# Supplementary material for: Synthesis of a library of stereo- and regiochemically diverse aminoglycoside derivatives
Source: Royal Society of Chemistry journal article supplement (doi:10.1039/b505865a), 2005-01-01
Supplement: b505865a.pdf [file b505865a.pdf]

## Supplementary information

### Experimental

General experimental methods have been previously described.<sup>1</sup> Anhydrous pyridine and DMF were purchased from Sigma Aldrich and used without further purification. All non-aqueous reactions were performed under an atmosphere of nitrogen. The numbering system used to name each compounds has been used to assign the NMR spectra; the numbering of the core ring is not marked with a dash in each case. Analytical HPLC was conducted on a Dionex HPLC system with diode array detection; unless otherwise stated, the column oven was set at 24 °C. An Econosil columns (silica particle size: 10 µm) was used for analytical (4.6 × 250 mm) work, and a Chiracel OD column (4.6 × 250 mm) was used for chiral analytical HPLC; samples were calibrated against external standard samples dissolved in isopropanol. Semi-preparative HPLC was conducted with a Waters 2525 binary gradient pump with detection by a Micromass ZQ mass spectrometer; an XTerra<sup>®</sup> preparative HPLC column (19 × 50 mm) was used. Preparative HPLC was generally conducted on a Gilson HPLC machine using a gradient of 90 → 95% MeCN in H<sub>2</sub>O over 30 min detecting at 200 nm on a Thermohypersil 250 × 21.2 mm, 8 µ, Hyperprep<sup>®</sup> HS C18 column. Microanalyses were carried out by staff of the Department of Chemistry using a Carlo Erba 1106 automatic analyser.

### 4,8-Dioxa-tricyclo[5.1.0.0<sup>3,5</sup>]octane *or cis*-1,4-Cyclohexadiene dioxide<sup>2a</sup> 12

A solution of 1,4-cyclohexadiene (5.0 g, 62 mmol) in dichloromethane (13 mL) was added dropwise to a solution of *m*-chloroperbenzoic acid (31.0 g, 125 mmol, 2 eq., 70 % in weight) in dichloromethane (120 mL) cooled at 0 °C. The rate of the addition was such that the temperature of the reaction mixture did not exceed 4 °C. The reaction was stirred for 8 h at 0 °C and allowed to warm to room temperature over 14 h. The reaction mixture was filtered, and the cake washed with dichloromethane (100 mL). The filtrate was stirred with a saturated aqueous solution of sodium sulfite (100 mL) over 30 min and then extracted with dichloromethane. The organic layer was stirred with calcium hydroxide (8.0 g) for 30 min, filtered, the cake washed with dichloromethane (100 mL), dried (Na<sub>2</sub>SO<sub>4</sub>) and concentrated

under reduced pressure. The crude mixture was purified by flash chromatography on silica gel (gradient elution: 1:0.8:0.2 → 6:3.8:0.2 → 7:2.8:0.2 dichloromethane–petrol–Et<sub>3</sub>N) to give the diepoxide **12** (4.1 g, 59%) as colourless prisms, m.p. 54-56 °C (from dichloromethane) (lit.<sup>3</sup> 59-60 °C); *R*<sub>f</sub> 0.25 (7:3 dichloromethane–petrol); *v*<sub>max</sub>/cm<sup>-1</sup> (film) 2960, 1278 and 1023; *δ*<sub>H</sub> (300 MHz, CDCl<sub>3</sub>) 3.09 (4H, d, *J* 1.0, 1-H, 2-H, 4-H and 5-H), 2.74 (2H, d, *J* 17.1, 3-H<sub>cis</sub> and 6-H<sub>cis</sub>), 2.28 (2H, dd, *J* 17.1 and 1.0, 3-H<sub>trans</sub> and 6-H<sub>trans</sub>); *δ*<sub>C</sub> (75 MHz, CDCl<sub>3</sub>) 49.6 (CHO), 23.9 (CH<sub>2</sub>); *m/z* (EI) 112.1 (20%, M<sup>+</sup>), 55.1 (100) and 39.1 (50); (Found: M<sup>+</sup>, 112.0520. C<sub>6</sub>H<sub>8</sub>O<sub>2</sub> requires *M*, 112.0519).

### **(1*R*,2*R*,4*R*,5*R*)-2,5-Diazido-cyclohexane-1,4-diol **13****

The diepoxide **12** (4.7 g, 41.5 mmol) was dissolved in dry ether (24 mL) in a flame dried round bottom flask. The (salen)Cr(III)Cl complex (*S,S*)-**16** (0.53 g, 0.8 mmol, 0.02 eq.) and trimethylsilylazide (11.5 mL, 87.1 mmol, 2.1 eq.) were added to the reaction mixture, which was stirred for 24 hr, (*S,S*)-**16** (0.53 mg, 0.8 mmol, 0.02 eq.) and trimethylsilylazide (11.5 mL, 87.1 mmol, 2.1 eq.) added and the reaction stirred for two days at room temperature. The crude reaction mixture was concentrated under reduced pressure and purified by flash chromatography on silica gel (gradient elution: 0.98:0:0.2 → 1:0.98:0.2 petrol–EtOAc–Et<sub>3</sub>N) to give the corresponding bis silyl ether (9.7 g, 68%), which was dissolved in dry methanol (94 mL), trifluoroacetic acid (1.8 mL, 24 μmol) added dropwise and stirred for 18 h. The reaction mixture was concentrated under reduced pressure and purified by flash chromatography on silica gel (7:3 petrol–EtOAc) and recrystallisation from dichloromethane to give the *diol* **13** (4.6 g, 57%) as colourless prisms, m.p. 139-141 °C (from dichloromethane); *R*<sub>f</sub> 0.56 (6:4 petrol–EtOAc); [*α*]<sub>D</sub> -21.4 (c. 1.05 in MeOH); (Found C, 36.45; H, 5.15; N, 42.55; C<sub>6</sub>H<sub>10</sub>N<sub>6</sub>O<sub>2</sub> requires C, 36.36; H, 5.09; N, 42.41%); *v*<sub>max</sub>/cm<sup>-1</sup> (film) 3339, 2933, 2104, 1256, 1010; *δ*<sub>H</sub> (300 MHz, MeOD) 3.66-3.50 (4H, m, 1-H, 2-H, 4-H and 5-H), 1.89-1.77 (2H, m, 3-H or 6-H) and 1.75-1.62 (2H, m, 3-H or 6-H); *δ*<sub>C</sub> (75 MHz, MeOD) 69.6-63.5 (1/4-CHO and 2/5-CN<sub>3</sub>) and 33.6 (3/6-CH<sub>2</sub>); *m/z* (ES) 221.0 (100%, MNa<sup>+</sup>). The sample was shown to have 70 ± 10% ee by chiral HPLC (Chiralcel OD column; elution with 3:97 isopropanol–hexane).

**(1*S*,2*S*,4*S*,5*S*)-2,5-Diazido-cyclohexane-1,4-diol **13'****

By the same general method, the diepoxide **12** (2.1 g, 18.5 mmol), (*R,R*)-**16** (0.23 g, 0.4 mmol, 0.02 eq.), trimethylsilylazide (5.1 mL, 38.9 mmol, 2.1 eq.), and trifluoroacetic acid (345  $\mu$ L, 4.2  $\mu$ mol) gave the *diol* **13'** (0.90 g, 25%) as colourless prisms,  $[\alpha]_D^{20} +21.7$  (*c*. 1.40 in MeOH), spectroscopically identical to **13** obtained previously. The sample was shown to have  $70 \pm 10\%$  ee by chiral HPLC (Chiralcel OD column; elution with 3:97 isopropanol–hexane).

**(1*R*,2*R*,4*R*,5*R*)-1,5-Diazido-2,4-bis-trimethylsilyloxy-cyclohexane**

The diepoxide<sup>2b</sup> **14** (168 mg, 3.0 mmol), (*S,S*)-*N-N'*-bis(3,5-di-*tert*-butyl-salicylidene)-1,2-cyclohexane-diaminochromium(III) chloride (84 mg, 0.12 mmol) and azidotrimethylsilane (1.2 mL, 9 mmol) were dissolved in ether (1 mL) and stirred for 48 h. Azidotrimethylsilane (600  $\mu$ L, 4.5 mmol) was added, the reaction mixture stirred for a further 16 h and then evaporated under reduced pressure to give a crude product, which was purified by flash chromatography, eluting with 79:20:1 petrol–EtOAc–Et<sub>3</sub>N to give the *diazide* (662 mg, 70%) as a yellow oil,  $R_f$  0.8 (8:2, petrol–EtOAc);  $[\alpha]_D^{20} -4.7$  (*c* 1.2 in CH<sub>2</sub>Cl<sub>2</sub>);  $\nu_{\max}/\text{cm}^{-1}$  (thin film) 2958, 2903, 2496, 2102 and 1703;  $\delta_H$  (500 MHz; CDCl<sub>3</sub>) 3.70 (2H, q, *J* 5.7, 2-CH and 4-CH), 3.37 (2H, q, *J* 5.7, 1-CH and 5-CH), 1.72 (2H, t, *J* 5.7, 3-CH<sub>2</sub>), 1.61 (2H, t, *J* 5.7, 5-CH<sub>2</sub>) and 0.00 (18H, s, TMS);  $\delta_C$  (75 MHz; CDCl<sub>3</sub>) 69.7, 61.7, 36.9, 29.2 and 0.00; *m/z* (ES) 315 (100%, M-N<sub>2</sub><sup>+</sup>); (Found: M-N<sub>2</sub><sup>+</sup> 315.1670; C<sub>12</sub>H<sub>27</sub>N<sub>6</sub>O<sub>2</sub>Si<sub>2</sub> requires *M-N*<sub>2</sub>, 315.1673).

**(1*R*,3*R*,4*R*,6*R*)-4,6-Diazidocyclohexane-1,3-diol<sup>3</sup> **15****

Trifluoroacetic acid (2  $\mu$ L) was added to a solution of (1*R*,2*R*,4*R*,5*R*)-1,5-Diazido-2,4-bis-trimethylsilyloxy-cyclohexane (534 mg, 1.7 mmol) dissolved in MeOH (2 mL), and the reaction mixture was stirred for 35 min. The reaction mixture was evaporated under reduced pressure to give a crude product, which was purified by flash chromatography eluting with 7:3 petrol–EtOAc to give the *diazide*<sup>3</sup> **15** (327 mg, 97%) as colourless prisms, mp 97-98 °C (from MeOH–CH<sub>2</sub>Cl<sub>2</sub>, lit.<sup>3</sup> 96 °C);  $R_f$  0.25 (7:3, petrol–EtOAc);  $[\alpha]_D^{20} -5.7$  (*c* 1.2 in CH<sub>2</sub>Cl<sub>2</sub>);

(Found: C, 36.6; H, 5.20; N, 42.3%; C<sub>14</sub>H<sub>14</sub>N<sub>2</sub>O requires C, 36.4; H, 5.10; N, 42.4%), spectroscopically identical to the racemate obtained previously. Analysis by chiral HPLC showed that the sample had >98%ee.

**(1*S*,3*S*,4*S*,6*S*)-4,6-Diazidocyclohexane-1,3-diol<sup>3</sup> 15'**

Azidotrimethylsilane (15.5 mL, 117 mmol) was added dropwise to a stirred solution of the diepoxide **14** (6.25 g, 55.8 mmol) and (*R,R*)-*N-N'*-bis(3,5-di-*tert*-butyl-salicylidene)-1,2-cyclohexane-diaminochromium(III) chloride (4 mol%, 705 mg, 1.12 mmol) in ether (19 mL) and stirred for 96 h and concentrated under reduced pressure to give a crude product, which was purified by flash chromatography, eluting with 99:10:1 petrol–EtOAc–Et<sub>3</sub>N to give the TMS protected diol as a yellow oil. The TMS-protected diol was dissolved in 0.05% TFA in MeOH (80 mL), stirred for 16 h and evaporated under reduced pressure to give a crude product, which was purified by flash chromatography eluting with 8:2 petrol–EtOAc and recrystallised from CH<sub>2</sub>Cl<sub>2</sub>–MeOH to give the *diol*<sup>3</sup> **15'** (4.44 g, 49%) as colourless prisms; mp 98–99 °C (from MeOH–CH<sub>2</sub>Cl<sub>2</sub>, lit.<sup>3</sup> 96 °C); *R*<sub>f</sub> 0.25 (7:3, petrol–EtOAc); [ $\alpha$ ]<sub>D</sub><sup>20</sup> + 5.6 (*c* 1.0 in CH<sub>2</sub>Cl<sub>2</sub>), spectroscopically identical to the racemate obtained previously. Analysis by chiral HPLC showed that the sample had >98%ee.

**(1*R*,3*S*,4*S*,6*R*)-Diazidocyclohexane-3,6-diol**

Azidotrimethylsilane (9.42 mL, 71.4 mmol) was added dropwise to stirred solution of the diepoxide **14** (2.0 g, 17.9 mmol) and (*R,R*)-*N-N'*-bis(3,5-di-*tert*-butyl-salicylidene)-1,2-cyclohexane-diaminochromium(III) chloride (4 mol%, 451 mg, 0.714 mmol) in ether (36 mL). After 96 h, the reaction mixture was filtered through a short pad of silica, and the crude residue treated with 0.05% TFA in MeOH (50 mL) for 30 min. The reaction mixture was concentrated under reduced pressure to give a crude product, which was recrystallised (twice) from crude (CH<sub>2</sub>Cl<sub>2</sub>–MeOH) and the mother liquor purified by flash chromatography eluting with 7:3 petrol–EtOAc to give the *centrosymmetric diol* **17** (183 mg, 5%) as colourless plates, m.p. 158–160 °C (from CH<sub>2</sub>Cl<sub>2</sub>–MeOH); *R*<sub>f</sub> 0.2 (7:3 petrol–EtOAc); (Found : C, 36.8; H, 5.05; N, 42.3; C<sub>6</sub>H<sub>10</sub>N<sub>6</sub>O<sub>2</sub> requires C, 36.4; H, 5.10; N, 42.4%);  $\nu_{\max}/\text{cm}^{-1}$  (thin film) 3376,

2939, 2906 and 2105;  $\delta_{\text{H}}$  (300 MHz;  $\text{d}_4\text{-MeOD}$ ) 3.51 (2H, ddd,  $J$  12.5, 9.5 and 4.5, 3-H and 6-H), 3.27 (2H, ddd,  $J$  12.5, 9.5 and 4.5, 1-H and 4-H), 2.03 (2H, app dt,  $^2J$  12.5 and  $J$  4.5, 2-H and 5-H) and 1.22 (2H, app q,  $^2J$  and  $J$  12.5, 2-H and 5-H);  $\delta_{\text{C}}$  (75 MHz;  $\text{d}_4\text{-MeOD}$ ) 73.0, 65.3 and 37.7;  $m/z$  (ES<sup>-</sup>) 197 [100%, (M-H)<sup>-</sup>]; (Found: [M-H] 197.0789;  $\text{C}_6\text{H}_{10}\text{N}_6\text{O}_2$  requires M-H, 197.0792).

### **(1R,3S,4S,6R)-Diazidocyclohexane-3,6-diacetate 18**

Triethylamine (1 mL) and acetic anhydride (1 mL) were added to the centrosymmetric diol **17** (50.0 mg, 0.25 mmol) and the reaction stirred for 1.5 h. The reaction mixture was evaporated under reduced pressure to give a crude product which was purified by flash chromatography eluting with 9:1 petrol-EtOAc to give the *diacetate* **18** (57.9 mg, 82%) as colourless plates, m.p. 151-152 °C (from petrol-Et<sub>2</sub>O);  $R_{\text{f}}$  0.20 (9:1 petrol-EtOAc);  $\nu_{\text{max}}/\text{cm}^{-1}$  (solid phase) 2967, 2102, 1735 and 1455;  $\delta_{\text{H}}$  (300 MHz;  $\text{CDCl}_3$ ) 4.74 (2H, ddd,  $J$  12.4, 9.9 and 4.6, 3-H and 6-H), 3.55 (2H, ddd,  $J$  12.4, 9.9 and 4.6, 1-H and 4-H), 2.39 (2H, app dt,  $J$  12.4 and 4.6, 2-H and 5-H), 2.12 (6H, s, OAc) and 1.46 (2H, app q,  $J$  12.6, 2-H and 5-H);  $\delta_{\text{C}}$  (75 MHz;  $\text{CDCl}_3$ ) 170.4, 72.8, 60.2, 33.3 and 21.4;  $m/z$  (ES) 300 (100%,  $\text{MNH}_4^+$ ); (Found:  $\text{MNH}_4^+$ , 300.1415;  $\text{C}_{10}\text{H}_{14}\text{N}_6\text{O}_2$  requires  $\text{MNH}_4$ , 300.1415).

### **(1S,3R,4R,6S)-Diazidocyclohexane-3-ol-6-acetate 19**

Porcine liver esterase (54  $\mu\text{l}$ , 10  $\text{mgml}^{-1}$ , 184  $\text{Umg}^{-1}$ , 100 U) was added to a stirred solution of the diacetate (65 mg, 0.23 mmol) suspended in aqueous Tris.HCl buffer (9 mL, 250 mM, pH 7.5) and DMSO (1 mL). After 16 h, water (10 mL) was added and the reaction mixture extracted with ether (3  $\times$  30 mL), dried ( $\text{MgSO}_4$ ), filtered and evaporated under reduced pressure to give a crude product, which was purified by flash chromatography eluting with 8:2 petrol-EtOAc to the *hydroxy acetate* **19** (25 mg, 46%) as a colourless oil,  $R_{\text{f}}$  0.20 (8:2 petrol-EtOAc);  $[\alpha]_{\text{D}}^{20} + 0.60$  ( $c$  0.66 in MeOH);  $\nu_{\text{max}}/\text{cm}^{-1}$  (thin film) 3357, 2928, 2098 and 1740;  $\delta_{\text{H}}$  (500 MHz;  $\text{CDCl}_3$ ) 4.75 (1H, ddd,  $J$  11.7, 9.9 and 4.7, 6-H), 3.53-3.48 (2H, m, 3-H and 1-H), 3.35 (1H, ddd,  $J$  11.7, 9.9 and 4.7, 4-H), 2.45 (1H, s, OH), 2.40 (1H, dt,  $J$  11.7 and 4.7, 5-H), 2.30 (1H, dt, 11.7 and 4.7, 2-H) and 1.45 (2H, 2  $\times$  app q,  $J$  11.7, 5-H and 2-H);  $\delta_{\text{C}}$

(75 MHz; CDCl<sub>3</sub>) 170.6, 73.3, 71.4, 63.6, 60.5, 35.6, 32.8 and 21.4; *m/z* (ES) 258 (100%, MNH<sub>4</sub><sup>+</sup>); (Found: MNH<sub>4</sub><sup>+</sup> 258.1309; C<sub>8</sub>H<sub>12</sub>N<sub>6</sub>O<sub>3</sub> requires *MNH<sub>4</sub>*, 258.1309).

**(1*R*,2*R*,4*S*,5*S*)-4-(acetyloxy)-2,5-diazidocyclohexyl-1-(1'*S*)-camphanic acid ester 20a**

(1*S*)-(–)-Camphanic chloride (8.3 mg, 38.5 μmol) was added in one portion to a stirred solution of the alcohol **19** (6.6 mg, 27.5 μmol) and dimethylaminopyridine (0.7 mg, 5.5 μmol) in pyridine (1 mL) at 0 °C. After 4 h, the reaction mixture was concentrated under reduced pressure and the crude residue redissolved in CH<sub>2</sub>Cl<sub>2</sub> (25 mL), washed with aqueous hydrochloric acid (25 mL of a 1 M solution), saturated aqueous sodium bicarbonate (25 mL), brine (25 mL), dried (MgSO<sub>4</sub>), filtered and evaporated under reduced pressure to give a crude product, which was purified by flash chromatography (gradient elution 8:2→7:3 petrol–Et<sub>2</sub>O) to give the (1'*S*)-camphanic ester **20a** (6.5 mg, 56%) as colourless needles, m.p. 186-187 °C (from petrol–Et<sub>2</sub>O); *R<sub>f</sub>* 0.15 (7:3 petrol–Et<sub>2</sub>O); [ $\alpha$ ]<sub>D</sub><sup>20</sup> –10.0 (*c* 0.16 in CH<sub>2</sub>Cl<sub>2</sub>);  $\nu_{\max}$ /cm<sup>-1</sup> (thin film) 2928, 2106, 1785 and 1751;  $\delta_{\text{H}}$  (500 MHz; CDCl<sub>3</sub>) 4.88-4.71 (2H, m, 4-H and 1-H), 3.65-3.55 (2H, m, 5-H and 2-H), 2.52-2.38 (3H, m, 6-H, 3-H and 4'-H or 3'-H), 2.13 (3H, s, OAc), 2.10-1.91 (2H, m, 4'-H and 3'-H), 1.71 (1H, ddd, <sup>2</sup>*J* 13.2, *J* 12.9 and 4.2, 4'-H or 3'-H), 1.50 (2H, m, 6-H and 3-H), 1.13 (3H, s, 6'-Me), 1.07 (3H, s, 9'-H or 8'-H) and 1.00 (3H, s, 9'-H or 8'-H);  $\delta_{\text{C}}$  (75 MHz, CDCl<sub>3</sub>) 178.2, 170.4, 167.2, 91.2, 73.5, 72.7, 60.2, 60.1, 55.3, 55.0, 33.3, 31.1, 29.3, 21.3, 17.3, 17.0 and 10.1 (1 carbon signal missing or overlapped); *m/z* (ES) 438 (100%, MNH<sub>4</sub><sup>+</sup>), 421 (40, MH<sup>+</sup>) and 443 (40, MNa<sup>+</sup>); (Found: MNa<sup>+</sup> 443.1670; C<sub>18</sub>H<sub>24</sub>N<sub>6</sub>O<sub>6</sub> requires *MNa*, 443.1655).

**(1*R*,2*R*,4*S*,5*S*) 4-(Acetyloxy)-2,5-diazidocyclohexyl-1-(1'*R*)-camphanic acid ester 20b**

By the same general method, the alcohol **19** (19 mg, 0.079 mmol) was converted into the (1'*R*)-camphanic ester **20b** (25.2 mg, 76%) as colourless plates, m.p. 185-186 °C (from petrol–EtOAc); *R<sub>f</sub>* 0.50 (8:2 petrol–EtOAc); [ $\alpha$ ]<sub>D</sub><sup>20</sup> +24.5 (*c* 0.62 in CH<sub>2</sub>Cl<sub>2</sub>);  $\nu_{\max}$ /cm<sup>-1</sup> (thin film) 2961, 2928, 2104, 1783 and 1737;  $\delta_{\text{H}}$  (300 MHz; CDCl<sub>3</sub>) 4.89 (1H, ddd, *J* 14.6, 12.1 and 4.7, 1-H), 4.76 (1H, ddd, *J* 14.4, 12.1, 4.5, 4-H), 3.67-3.56 (2H, m, 5-H and 2-H), 2.51-2.33 (3H, m, 3'-H or 4'-H and, 3-H and 6-H), 2.14 (3H, s, OAc), 2.14-2.03 (1H, m, 3'-H or 4'-H),

1.95 (1H, ddd,  $^2J$  13.2,  $J$  10.7 and 4.5, 3'-H or 4'-H), 1.71 (1H, ddd,  $^2J$  13.2,  $J$  10.7 and 4.5, 3'-H or 4'-H), 1.51 (2H, m, 6-H and 3-H), 1.11 (3H, s, 6'-Me), 1.07 (3H, s, 8'-Me or 9'-Me) and 0.97 (3H, s 8'-H or 9'-H);  $\delta_C$  (75 MHz,  $CDCl_3$ ) 177.9, 170.0, 166.8, 90.7, 72.8, 72.3, 60.1, 59.5, 54.8, 54.5, 32.8, 32.5, 30.6, 28.9, 20.9, 16.7, 16.6 and 9.7;  $m/z$  (ES) 438 (100%,  $MNH_4^+$ ); (Found:  $MNa^+$  443.1669;  $C_{18}H_{24}N_6O_6$  requires  $MNa$ , 443.1655).

### Phenyl-2,3,4,6-tetraol-1-thio- $\beta$ -L-glycopyranoside

A catalytic amount of sodium methoxide (0.90 g, 0.2 eq., 17.0 mmol) was added to a solution of phenyl-2,3,4,6-tetra-*O*-acetyl-1-thio- $\beta$ -L-glycopyranoside (37.0 g, 84.0 mmol) dissolved in dry MeOH (158 mL). The reaction mixture was stirred at room temperature 18 h and concentrated under reduced pressure. The residue was pre-absorbed on silica and filtered through a short pad of silica (gradient elution 9:1  $\rightarrow$  8:2 EtOAc–MeOH). The filtrate was then concentrated under reduced pressure and phenyl-2,3,4,6-tetraol-1-thio- $\beta$ -D-glycopyranoside (21.3 g, 93%) was obtained as a colourless foam, which has been used without any further purification.

### Phenyl-6-*O*-toluenesulfonyl-2,3,4-triol-1-thio- $\beta$ -L-glycopyranoside

A solution of *p*-toluenesulfonyl chloride (20.0 g, 1.3 eq., 112 mmol) in dry pyridine (150 mL) was added dropwise to a solution of phenyl-2,3,4,6-tetraol-1-thio- $\beta$ -D-glycopyranoside (23.4 g, 86.0 mmol) in dry pyridine (357 mL) at 0 °C. After 5 h stirred at 0 °C, the reaction was warmed to ambient temperature and stirred for an additional 18 h. The reaction was then quenched with methanol (50 mL) and concentrated under reduced pressure. The residue was dissolved in dichloromethane (150 mL) and washed sequentially with a saturated aqueous sodium hydrogen carbonate solution (100 mL), 1 M hydrochloric acid solution (100 mL) and saturated aqueous sodium hydrogen carbonate solution (2 $\times$ 100 mL). The aqueous layers were extracted with dichloromethane (2 $\times$ 100 mL) and the combined organic layers were dried ( $Na_2SO_4$ ) and concentrated under reduced pressure. The residue was purified by flash chromatography on silica gel (gradient elution 6:4  $\rightarrow$  0:1 petrol–EtOAc) to

provide phenyl-6-*O*-toluenesulfonyl-2,3,4-triol-1-thio-β-L-glycopyranoside (21.8 g, 60%) as colourless foam;  $[\alpha]_D +40.0$  (c. 0.22 in CHCl<sub>3</sub>).

#### **Phenyl-6-azido-6-deoxy-2,3,4-triol-1-thio-β-L-glycopyranoside**

Sodium azide (4.84 g, 1.2 eq., 74.0 mmol) was added to a solution of phenyl-6-*O*-toluenesulfonyl-2,3,4-triol-1-thio-β-L-glycopyranoside (26.4 g, 62.0 mmol) in dry DMF (250 mL). The reaction was heated at 80 °C during 8 h. After cooling at room temperature, the reaction mixture was concentrated under reduced pressure. The residue was dissolved in ethyl acetate (100 mL) and washed with a saturated aqueous sodium hydrogen carbonate solution (100 mL) and brine (100 mL), the aqueous layers were backwashed with ethyl acetate (2×100 mL) and the combined organic layers were dried (Na<sub>2</sub>SO<sub>4</sub>), and concentrated under reduced pressure. The residue was purified by flash chromatography on silica gel with pure ethyl acetate to provide phenyl-6-azido-6-deoxy-2,3,4-triol-1-thio-β-D-glycopyranoside (14.1 g, 48%) as a colourless foam,  $[\alpha]_D +15.6$  (c. 1.00 in CHCl<sub>3</sub>).

#### **Phenyl-6-azido-6-deoxy-2,3,4-tri-*O*-benzoyl-1-thio-β-D-glycopyranoside 21B**

Benzoyl chloride (4.1 mL, 3.0 eq., 35.4 mmol) was added dropwise at 0 °C to a stirred solution of phenyl-6-azido-6-deoxy-2,3,4-triol-1-thio-β-D-glycopyranoside (3.50 g, 11.8 mmol), triethylamine (6.6 mL, 4 eq., 47.2 mmol) and dimethylaminopyridine (0.14 g, 0.1 eq., 1.18 mmol) in dichloromethane (30 mL). The reaction mixture was warmed to room temperature over 18 h before being concentrated under reduced pressure. The residue was purified by flash chromatography on silica gel (gradient elution 9:1 → 8:2 petrol–EtOAc) to provide 2-azidomethyl-3,4,5-tris-benzoyloxy-6-phenylsulfanyl-tetrahydro-pyran (4.37 g, 61%), as colourless prisms, mp 43-44 °C;  $R_f$  0.41 (8:2 petrol–EtOAc);  $[\alpha]_D +30.8$  (c. 1.18 in CHCl<sub>3</sub>); (Found C, 65.25; H, 4.5; N, 6.7; S, 5.2; C<sub>33</sub>H<sub>27</sub>N<sub>3</sub>O<sub>7</sub>S requires C, 65.01; H, 4.46; N, 6.89; S, 5.26%);  $\nu_{\max}/\text{cm}^{-1}$  (film) 3155, 2959, 2107, 1734, 1278, 1091, 908, 733, 650;  $\delta_H$  (300 MHz, CDCl<sub>3</sub>) 7.90 (2H, d,  $J$  8.7, Bz 3-H and 5-H), 7.83 (2H, d,  $J$  8.7, Bz 3-H and 5-H), 7.71 (2H, d,  $J$  8.7, Bz 3-H and 5-H), 7.50-7.41 (3H, m, Bz 4-H), 7.37-7.16 (11H, m, Ph), 5.81 (1H, t,  $J$  9.7, 3-H), 5.39 (1H, t,  $J$  9.7, 2-H or 4-H), 5.38 (1H, t,  $J$  9.7, 2-H or 4-H), 4.97 (1H, d,  $J$



10.2, 1-H), 3.89 (1H, ddd,  $J$  9.7, 6.7 and 3.1, 5-H), 3.45 (1H, dd,  $J$  13.3 and 6.7, 6-H<sub>A</sub>) and 3.36 (1H, dd,  $J$  13.3 and 3.1, 6-H<sub>B</sub>);  $\delta_c$  (75 MHz, CDCl<sub>3</sub>) 164.7, 164.2, 163.9, 132.8, 132.6, 132.4, 129.9, 128.8, 128.7, 128.1, 128.0, 127.7, 127.6, 127.5, 127.4, 127.2, 85.2, 76.6, 72.9, 69.3, 68.8 and 50.4 (3 aromatic peaks overlapped or missing);  $m/z$  (ES) 632.6 (20%, MNa<sup>+</sup>) and 105.9 (100%, PhCO<sup>+</sup>).

#### **Phenyl-6-azido-6-deoxy-2,3,4-tri-*O*-benzyl-1-thio- $\beta$ -D-glycopyranoside 21A'**

Benzyl bromide (7.2 mL, 2.6 eq., 60.5 mmol) was added at 0 °C to a stirred solution of phenyl-6-azido-6-deoxy-2,3,4-triol-1-thio- $\alpha$ -D-glycopyranoside (7.07 g, 23.8 mmol) in dimethylformamide (104 mL), and followed by an portionwise addition of sodium hydride (2.36 g, 2.5 eq., 59.0 mmol). After 1 h, the reaction mixture was allowed to slowly warm to room temperature. After 3 h, additional portions of benzyl bromide (2.8 mL, 1.0 eq., 23.5 mmol) and sodium hydride (0.76 g, 0.8 eq., 19.0 mmol) were added. After 1 h, TLC showed no more starting material, the reaction mixture was quenched with methanol (50 mL) and the reaction was concentrated under reduced pressure. The residue was dissolved in ethyl acetate (100 mL), washed with a saturated aqueous ammonium chloride solution (50 mL) and brine (2  $\times$  50 mL). The organic layer was dried (Na<sub>2</sub>SO<sub>4</sub>), concentrated under reduced pressure, the crude mixture was purified by flash chromatography on silica gel (9:1 petrol–EtOAc) and recrystallised from EtOH to provide phenyl-6-azido-6-deoxy-2,3,4-tri-*O*-benzyl-1-thio- $\beta$ -D-glycopyranoside, as colourless needles (3.63 g, 27%),  $[\alpha]_D -16.0$  (c. 0.60 in CHCl<sub>3</sub>).

#### **Phenyl-6-azido-6-deoxy-2,3,4-tri-*O*-benzoyl-1-thio- $\beta$ -L-glycopyranoside 21B'**

Benzoyl chloride (8.2 mL, 3.0 eq., 70.8 mmol) was added dropwise at 0 °C to a solution of phenyl-6-azido-6-deoxy-2,3,4-triol-1-thio- $\beta$ -D-glycopyranoside (7.06 g, 23.6 mmol), triethylamine (13.2 mL, 4 eq., 94.4 mmol) and dimethylaminopyridine (0.28 g, 0.1 eq., 2.36 mmol) in dichloromethane (60 mL). The reaction mixture was warmed to room temperature over 18 h then concentrated under reduced pressure, and residue was purified by flash chromatography on silica gel (gradient elution 9:1 to 8:2 petrol–EtOAc) to provide

phenyl-6-azido-6-deoxy-2,3,4-tri-*O*-benzoyl-1-thio- $\beta$ -D-glycopyranoside, as colourless prisms (9.50 g, 66%),  $[\alpha]_D -14.4$  (*c.* 1.08 in  $\text{CHCl}_3$ ).

### **2-Acetamido-3,4,6-tri-*O*-acetyl-2-deoxy-1-phenylthio- $\beta$ -D-glucopyranoside<sup>4</sup> **24****

Zinc (II) iodide (76.92 g, 240.4 mmol) and phenylthiotrimethylsilane (25.0 g, 137 mmol) were added to a stirred suspension of D-glucosamine pentaacetate (13.36 g, 34.34 mmol) in dichloroethane (250 mL) and the reaction mixture heated to 50 °C for 8 h. The reaction mixture was allowed to cool, diluted with  $\text{CH}_2\text{Cl}_2$  (100 mL), filtered through celite and the filtrate was washed with saturated aqueous sodium hydrogen carbonate solution (250 mL), water (250 mL), dried ( $\text{Na}_2\text{SO}_4$ ), filtered and evaporated under reduced pressure to give a crude product, which was purified by flash chromatography eluting with 4:6 petrol–EtOAc to give the 2-acetamido-3,4,6-tri-*O*-acetyl-2-deoxy-1-phenylthio- $\beta$ -D-glucopyranoside<sup>4</sup> **24** (7.01 g, 47%) as colourless prisms, m.p. 207-209 °C [from EtOAc–petrol, lit.<sup>4</sup> 210-212 °C (from EtOAc–petrol)];  $R_f$  0.30 (75:25 petrol–EtOAc);  $[\alpha]_D^{20} -22.4$  [*c.* 1.6 in  $\text{CHCl}_3$ , lit.<sup>4</sup>  $-24.0$  (*c.* 1.0,  $\text{CHCl}_3$ )];  $\nu_{\text{max}}/\text{cm}^{-1}$  (thin film) 3305, 3078, 2951, 1747 and 1661;  $\delta_{\text{H}}$  (300 MHz;  $\text{CDCl}_3$ ); 7.50-7.48 (2H, m, SPh), 7.31-7.28 (3H, m, SPh), 5.60 (1H, d,  $J$  9.2, NHAc), 5.22 (1H, t,  $J$  9.2, 3-H), 5.06 (1H, t,  $J$  9.2, 4-H), 4.85 (1H, d,  $J$  10.2, 1-H), 4.23 (1H, dd,  $^2J$  12.2 and  $J$  5.6, 6-H), 4.16 (1H, dd,  $^2J$  12.2 and  $J$  5.6, 6-H), 4.03 (1H, app. dd,  $J$  10.2 and 9.2, 2-H), 3.72 (1H, dt,  $J$  9.2 and 5.6, 5-H), 2.08 (3H, s, OAc), 2.02 (3H, s, OAc), 2.01 (3H, s, OAc) and 1.99 (3H, s, NAc);  $m/z$  (ES) 439 (100%,  $\text{MH}^+$ ).

### **Phenyl-6-*O*-toluenesulfonyl-2-azido-2-deoxy-3,4-diol- $\beta$ -D-glycopyranoside<sup>5</sup> **25****

The glucosamine **24** (6.98 g, 15.9 mmol) was heated under reflux conditions in aqueous sodium hydroxide (150 mL of a 2 M solution) for 24 h. The resulting solution was cooled on ice, neutralised to pH 7 with aqueous hydrochloric acid (2 M), filtered through a short pad of silica eluting with EtOAc–MeOH– $\text{H}_2\text{O}$  7:2:1 (200 mL), and evaporated under reduced pressure to give the free amine. Dimethylaminopyridine (3.88 g, 31.8 mmol) was added and the reaction mixture was redissolved in methanol (200 mL), and a solution of trifluoromethanesulfonic azide (35.46 mmol) in  $\text{CH}_2\text{Cl}_2$  (76 mL) was added dropwise. The

reaction mixture was stirred for 16 h, evaporated under reduced pressure and the resulting residue was redissolved in EtOAc (100 mL), washed with water (2 × 75 mL), and the combined aqueous washings extracted with EtOAc (2 × 75 mL). The combined organic extracts were dried (NaSO<sub>4</sub>), filtered and evaporated under reduced pressure. The residue was dissolved in pyridine (100 mL), cooled to 0 °C and *p*-toluene sulfonyl chloride (4.18 g, 21.9 mmol) dissolved in pyridine (100 mL) was added dropwise *via* cannula. After stirring for 8 h, MeOH (20 mL) was added and the reaction mixture evaporated under reduced pressure to give a crude product, which was pre-absorbed onto silica and purified by flash chromatography eluting with 6:4 petrol–EtOAc to give the azide<sup>5</sup> **25** (3.58 g, 69%) as a colourless oil, *R*<sub>f</sub> 0.20 (6:4 petrol–EtOAc);  $[\alpha]_D^{20} + 40.8$  (*c* 1.51 in MeOH);  $\nu_{\max}/\text{cm}^{-1}$  (thin film) 3401, 3060, 2917, 2113 and 1597;  $\delta_{\text{H}}$  (300 MHz; CDCl<sub>3</sub>) 7.81 (2H, d, *J* 8.2, OTs), 7.48 (2H, dd, *J* 7.8 and 1.8, Ph), 7.35–7.25 (5H, m, Ph and OTs), 4.41 (1H, d, *J* 10.1, 1-H), 4.30 (1H, br s, 5-H), 3.49–3.37 (6H, m, 6-H, 4-H, 3-H and OH), 3.21 (1H, t, *J* 10.1, 2-H) and 2.42 (3H, s, Me);  $\delta_{\text{C}}$  (75 MHz, CDCl<sub>3</sub>) 133.3, 132.1, 130.0, 129.4, 129.0, 128.5, 128.0, 126.0, 86.2, 77.0, 76.6, 69.1, 68.4, 64.5 and 21.7; *m/z* (ES) 469 (100%, MNH<sub>4</sub><sup>+</sup>); (Found: MNH<sub>4</sub><sup>+</sup> 469.1198; C<sub>19</sub>H<sub>25</sub>N<sub>4</sub>O<sub>6</sub>S<sub>2</sub> requires MNH<sub>4</sub>, 469.1216).

#### ***S*-Phenyl-6-*O*-toluenesulfonyl-2-azido-2-deoxy-3,4-di-*O*-benzyl-β-D-glycopyranoside<sup>5</sup> **26****

Sodium azide (598 mg, 9.2 mmol) was added to a stirred solution of the tosylate **25** (3.193 g, 7.1 mmol) in DMF (100 mL) and the reaction mixture heated to 80 °C for 18 h. The reaction mixture was concentrated under reduced pressure and the residue redissolved in EtOAc (100 mL), washed with saturated aqueous sodium bicarbonate solution (100 mL), then the aqueous layer extracted with EtOAc (2 × 100 mL) and the combined organic extracts dried (MgSO<sub>4</sub>), filtered and evaporated under reduced pressure to give the product<sup>5</sup> (2.03 g, 89%), which was used without further purification.

#### ***S*-Phenyl-6,2-azido-6,2-deoxy-3,4-di-*O*-benzyl-β-D-glycopyranoside<sup>5</sup> **21G****

Sodium hydride (60% dispersion in mineral oil, 2.54 g, 63.4 mmol) was added portionwise to a stirred solution of the sugar **26** (2.04 g, 6.34 mmol) and *tert*-butyl ammonium iodide (468

mg, 1.27 mmol) in DMF (100 mL) at 0 °C. After 1h, benzyl bromide (3.77 mL, 31.7 mmol) was added dropwise and the reaction stirred at room temperature for 1 h. The reaction was quenched with saturated ammonium chloride (100 mL), extracted with CH<sub>2</sub>Cl<sub>2</sub> (3 × 100 mL), and the combined organic extracts washed with water (200 mL), brine (200 mL), dried (MgSO<sub>4</sub>), filtered and evaporated under reduced pressure to give a crude product, which was purified by flash chromatography (gradient elution 9:1 → 7:3 petrol–EtOAc) to give the benzylated sugar<sup>5</sup> **21G** (484 mg, 31%) as a colourless oil, *R*<sub>f</sub> 0.20 (9:1 petrol–EtOAc);  $[\alpha]_D^{20} + 6.46$  (*c* 0.99 in CH<sub>2</sub>Cl<sub>2</sub>);  $\nu_{\max}/\text{cm}^{-1}$  (thin film) 3063, 3031, 2916, 2868 and 2109;  $\delta_{\text{H}}$  (300 MHz; CDCl<sub>3</sub>) 7.72-7.69 (2H, m, Ph), 7.46-7.31 (13H, m, Ph), 4.97 (1H, d, <sup>2</sup>*J* 10.5, CH<sub>2</sub>Ph), 4.93 (1H, d, <sup>2</sup>*J* 11.0, CH<sub>2</sub>Ph), 4.90 (1H, d, <sup>2</sup>*J* 11.0, CH<sub>2</sub>Ph), 4.67 (1H, d, <sup>2</sup>*J* 10.5, CH<sub>2</sub>Ph), 4.48 (1H, d, *J* 10.0, 1-H), 3.66-3.53 (4H, m, 6-H, 5-H, 4-H and 3-H) and 3.43-3.36 (2H, m, 6-H and 2-H);  $\delta_{\text{C}}$  (75 MHz; CDCl<sub>3</sub>) 137.9, 137.8, 135.0, 130.6, 129.6, 129.3, 129.1, 128.7, 128.6, 128.4, 86.4, 85.4, 78.8, 78.3, 76.4, 75.7, 65.4 and 51.6 (two carbon signals missing or overlapped); *m/z* (ES) 525 (100%, MNa<sup>+</sup>); (Found: MNa<sup>+</sup> 525.1706; C<sub>26</sub>H<sub>26</sub>N<sub>6</sub>O<sub>3</sub>S requires MNa<sup>+</sup>, 525.1685).

#### General procedure for glycosylation (Method A)

The glycosyl donor (0.43 mmol) and the acceptor (0.34 mmol), both freshly dried azeotropically by removal of toluene, were dissolved in dry dichloromethane (2.6 mL) and transferred with a syringe into a flame dried round bottom flask containing activated 4 Å molecular sieves. The reaction mixture was cooled to 0 °C, *N*-iodosuccinimide (104 mg, 0.46 mmol) and silver(I) trifluoromethanesulfonate (9 mg, 0.03 mmol) added simultaneously, stirred for 2 h and quenched with Et<sub>3</sub>N (1 mL). The reaction mixture was filtered through celite, eluting with dichloromethane (15 mL), washed with a solution of 10% aqueous Na<sub>2</sub>S<sub>2</sub>O<sub>3</sub> solution (2×10 mL) and brine (2×10 mL), and the combined organic extracts were dried (Na<sub>2</sub>SO<sub>4</sub>) and concentrated under reduced pressure to give a crude product.

#### General procedure for glycosylation (Method B)

The glycosyl donor (5.57 mmol) and the acceptor (7.06 mmol), both freshly dried azeotropically by removal of toluene, were dissolved in dry dichloromethane (13 mL) and diethyl ether (40 mL) respectively, and transferred with a syringe into a flame dried round bottom flask containing activated 4 Å molecular sieves. The reaction mixture was cooled to 0 °C, *N*-iodosuccinimide (1.63 g, 7.23 mmol) and silver(I) trifluoromethanesulfonate (286 mg, 1.11 mmol) added simultaneously, stirred for 3 h and quenched with Et<sub>3</sub>N (5 mL). The reaction mixture was filtered through celite, eluting with dichloromethane (50 mL), washed with a solution of 10% aqueous Na<sub>2</sub>S<sub>2</sub>O<sub>3</sub> solution (2×50 mL) and brine (2×50 mL), and the combined organic extracts were dried (Na<sub>2</sub>SO<sub>4</sub>) and concentrated under reduced pressure to give a crude product.

#### General procedure for glycosylation with a trichloroacetimidate donor (Method C)

A solution of the trichloroacetimidate donor (1 equivalent), the acceptor (1.2 equivalents) and powdered 4 Å molecular sieves (80 mg) in dichloromethane (5 ml) were stirred at room temperature for 1 h. The reaction mixture was cooled to –60 °C and boron trifluoride diethyl etherate (0.1 equivalents) was added dropwise. The reaction was stirred at –60 °C for 2 h and then quenched with solid NaHCO<sub>3</sub> and stirred for 15 min. The mixture was filtered through celite, washing with dichloromethane and EtOAc, and the solvent was removed under reduced pressure to yield a crude product.

#### (1*R*,2*S*,3*S*,4*R*,6*S*)-1-*O*-(6'-Azido-6'-deoxy-2',3',4'-tri-*O*-benzyl- $\alpha$ -D-glucopyranosyl)-2,3-diacetoxy-4,6-diazido-cyclohexanol **27A**

By method A, the glycosyl donor **21A** (242 mg, 1.2 eq., 0.43 mmol) and the acceptor **11** (100 mg, 1.0 eq., 0.34 mmol), gave a crude product which was purified by flash chromatography on silica gel (gradient elution 9:1 → 8:2 petrol–EtOAc) to give **27A** (0.16 g, 65%) as a yellow oil, *R*<sub>f</sub> 0.51 (7:3 petrol–EtOAc); [ $\alpha$ ]<sub>D</sub> +34.2 (c. 1.10 in CHCl<sub>3</sub>);  $\nu_{\max}$ /cm<sup>-1</sup> (film) 2931, 2103, 1756, 1234 and 1071;  $\delta_{\text{H}}$  (500 MHz, CDCl<sub>3</sub>) 7.40–7.20 (15H, m, Ph), 5.18 (1H, dd, *J* 9.8 and 9.4, 1-H), 5.13 (1H, d, *J* 3.4, 1'-H), 4.96 (1H, dd, *J* 10.2 and 9.8, 2-H), 4.89 (1H, d, *J* 11.1, CH<sub>A</sub>HPh), 4.86 (1H, d, *J* 11.1, CH<sub>B</sub>HPh), 4.78 (1H, d, *J* 11.1, CHH<sub>B</sub>Ph), 4.71 (1H, d, *J*

12.0,  $CH_C$ HPh), 4.64 (1H, d,  $J$  12.0,  $CHH_C$ ·Ph), 4.59 (1H, d,  $J$  11.1,  $CHH_A$ ·Ph), 4.12 (1H, d,  $J$  9.4, 5'-H), 3.96 (1H, t,  $J$  9.4, 3'-H), 3.64-3.47 (6H, m, 2'-H, 4'-H, 6'-H<sub>A</sub>, 3-H, 4-H and 6-H), 3.37 (1H, dd,  $J$  13.3 and 4.7, 6'-H<sub>B</sub>), 2.37 (1H, ddd,  $J$  12.8, 4.7 and 4.3, 5-H<sub>A</sub>), 2.08 (3H, s, CH<sub>3</sub>), 1.86 (3H, s, CH<sub>3</sub>) and 1.56 (1H, q,  $J$  12.8, 5-H<sub>B</sub>);  $\delta_C$  (125 MHz, CDCl<sub>3</sub>) 169.8 (C=O), 169.6 (C=O), 138.4, 138.0, 137.7 (*o*-Ph), 128.5, 128.4, 128.3, 128.1, 127.9, 127.8, 127.7, 127.6, 127.5, 97.9 (1'-C), 81.3 (3'-C), 79.8 (4'-C), 78.2, 78.1 (2'-C and 3-C), 76.0 (CH<sub>2</sub>Ph), 75.5 (CH<sub>2</sub>Ph), 74.1 (2-C), 73.8 (CH<sub>2</sub>Ph), 73.2 (1-C), 71.1 (5'-C), 60.0, 57.8 (4-C and 6-C), 51.2 (6'-C), 32.3 (5-C), 20.7 (CH<sub>3</sub>) and 20.6 (CH<sub>3</sub>);  $m/z$  (ES) 778.3 (76%, MNa<sup>+</sup>) and 430.2 (100); (Found: MNa<sup>+</sup>, 778.2921. C<sub>37</sub>H<sub>41</sub>O<sub>9</sub>N<sub>9</sub> requires MNa, 778.2925).

**(1R,2S,3S,4R,6S)-1-O-(6'-Azido-6'-deoxy-2',3',4'-tri-O-benzyl- $\alpha$ -L-glucopyranosyl)-2,3-diacetoxy-4,6-diazido-cyclohexanol 27A'**

By method A, the glycosyl donor **21A'** (0.46 g, 1.2 eq., 0.81 mmol) and the acceptor **11** (0.20 g, 1.0 eq., 0.67 mmol) gave a crude product which was purified by flash chromatography on silica gel (gradient elution 9:1 to 8:2 petrol–EtOAc) to give **27A'** (0.28 g, 55%) as a yellow oil;  $R_f$  0.51 (7:3 petrol–EtOAc);  $[\alpha]_D -25.0$  (c. 0.16 in CHCl<sub>3</sub>);  $\nu_{max}/cm^{-1}$  (film) 2925, 2103, 1754, 1234 and 1072;  $\delta_H$  (500 MHz, CDCl<sub>3</sub>) 7.40-7.20 (15H, m, Ph), 5.09 (1H, d,  $J$  3.4, 1'-H), 5.04 (1H, t,  $J$  9.4, 2-H), 4.95 (1H, d,  $J$  10.7,  $CH_A$ HPh), 4.88 (1H, d,  $J$  11.1,  $CH_B$ HPh), 4.87 (1H, dd,  $J$  9.8 and 8.6, 3-H), 4.78 (1H, d,  $J$  11.9,  $CH_C$ HPh), 4.76 (1H, d,  $J$  11.1,  $CHH_B$ ·Ph), 4.71 (1H, d,  $J$  11.9,  $CHH_C$ ·Ph), 4.57 (1H, d,  $J$  10.7,  $CHH_A$ ·Ph), 3.97 (1H, t,  $J$  9.4, 3'-H), 3.82 (1H, dt,  $J$  9.8 and 2.5, 5'-H), 3.60-3.47 (6H, m, 2'-H, 4'-H, 6'-H, 1-H, 4-H and 6-H), 3.35 (1H, dd,  $J$  13.7 and 2.7, 6'-H), 2.28 (1H, ddd,  $J$  12.8, 4.7 and 4.3, 5-H<sub>A</sub>), 2.07 (3H, s, CH<sub>3</sub>), 2.02 (3H, s, CH<sub>3</sub>) and 1.44 (1H, q,  $J$  12.8, 5-H<sub>B</sub>);  $\delta_C$  (125 MHz, CDCl<sub>3</sub>) 170.0 (C=O), 169.8 (C=O), 138.6, 138.4, 138.1 (*o*-Ph), 128.5, 128.4, 128.3, 128.2, 128.1, 127.9, 127.8, 127.7, 127.6 (Ph), 98.9 (1'-C), 81.9 (2'-C), 80.8 (3'-C), 77.2 (4'-C and 1-C), 75.5 (CH<sub>2</sub>Ph), 75.2 (CH<sub>2</sub>Ph), 74.6 (3-C), 73.5 (CH<sub>2</sub>Ph), 73.2 (2-C), 70.9 (5'-C), 60.2, 58.1 (4-C and 6-C), 50.8 (6'-C), 31.9 (5-C), 20.7 (CH<sub>3</sub>) and 20.6 (CH<sub>3</sub>);  $m/z$  (ES) 778.3 (97%, MNa<sup>+</sup>) and 430.2 (100); (Found: MNa<sup>+</sup>, 778.2891. C<sub>37</sub>H<sub>41</sub>O<sub>9</sub>N<sub>9</sub>Na requires MNa, 778.2925).

**(1*R*,2*S*,3*S*,4*R*,6*S*)-1-*O*-(6'-Azido-6'-deoxy-2',3',4'-tri-*O*-benzoyl- $\alpha$ -D-glucopyranosyl)-2,3-diacetoxy-4,6-diazido-cyclohexanol 27B**

By method A, the glycosyl donor **21B** (102 mg, 1.2 eq., 0.16 mmol) and the acceptor **11** (42 mg, 1.0 eq., 0.14 mmol) gave a crude product was purified by flash chromatography on silica gel, eluting with 8:2 petrol–EtOAc, to give **27B** (83.5 mg, 75%) as a yellow oil;  $R_f$  0.53 (6:4 petrol–EtOAc);  $[\alpha]_D -16.5$  (c. 1.04 in  $\text{CHCl}_3$ );  $\nu_{\text{max}}/\text{cm}^{-1}$  (film) 2931, 2103, 1735, 1642, 1260 and 1069;  $\delta_{\text{H}}$  (500 MHz,  $\text{CDCl}_3$ ) 7.96 (2H, d,  $J$  7.6, Ph 2-H and 6-H), 7.91 (2H, d,  $J$  7.6, Ph 2-H and 6-H), 7.80 (2H, d,  $J$  7.6, Ph 2-H and 6-H), 7.56-7.46 (2H, m, Ph 4-H), 7.41-7.33 (5H, m, Ph), 7.31-7.26 (2H, m, Ph 3-H and 5-H), 5.88 (1H, t,  $J$  9.6, 3'-H), 5.45-5.38 (2H, m, 2'-H and 4'-H), 5.17 (1H, d,  $J$  7.9, 1'-H), 5.04-4.94 (2H, m, 1-H and 3-H), 3.94 (1H, dd,  $J$  7.6 and 7.4, 5'-H), 3.65 (1H, dd,  $J$  9.4 and 9.2, 2-H), 3.54 (1H, dd,  $J$  13.5 and 7.4, 6'-H<sub>A</sub>), 3.51-3.39 (3H, m, 6'-H<sub>B</sub>, 4-H and 6-H), 2.31-2.23 (1H, m, 5-H<sub>A</sub>), 2.13 (3H, s, CH<sub>3</sub>), 2.07 (3H, s, CH<sub>3</sub>) and 1.54 (1H, q,  $J$  12.6, 5-H<sub>B</sub>);  $\delta_{\text{C}}$  (125 MHz,  $\text{CDCl}_3$ ) 169.7 (C=O Ac), 169.6 (C=O Ac), 165.7 (C=O Bz), 165.3 (C=O Bz), 164.9 (C=O Bz), 133.7, 133.3 (4-C Ph), 129.9, 129.8, 129.7 (2C and 6C Ph), 129.1, 128.7, 128.5 (1-C Ph), 128.5, 128.4, 128.3 (3C and 5C Ph), 100.6 (1'-C), 79.1 (2-C), 73.6 (5'-C and 3-C), 72.7 (3'-C), 72.0 (4'-C), 71.1 (1-C), 70.2 (2'-C), 60.1, 57.8 (4-C and 6-C), 51.3 (6'-C), 32.3 (5-C), 20.8 (CH<sub>3</sub>), 20.7 (CH<sub>3</sub>) (1 aromatic peak overlapped or missing);  $m/z$  (ES) 820.2 (100%,  $\text{MNa}^+$ ) and 500.2 (79); (Found:  $\text{MNa}^+$ , 820.2270.  $\text{C}_{37}\text{H}_{35}\text{O}_{12}\text{N}_9$  requires  $\text{MNa}$ , 820.2303).

**(1*R*,2*S*,3*S*,4*R*,6*S*)-1-*O*-(6'-Azido-6'-deoxy-2',3',4'-tri-*O*-benzyl- $\alpha$ -D-glucopyranosyl)-4,6-diazido-cyclohexan-2,3-ol 31A**

A catalytic amount of sodium methoxide (3 mg, 0.2 eq., 0.06 mmol) was added to a solution of the diacetylated glycoside **4A** (165 mg, 0.22 mmol) in dry MeOH (1.4 mL). The reaction mixture was stirred at room temperature for 18h and concentrated under reduced pressure. The crude product was pre-absorbed on silica and filtered through a short pad of silica (gradient elution 9:1 to 8:2 EtOAc–MeOH) to give **31A** (67 mg, 65%) as a yellow oil;  $R_f$  0.26 (7:3 petrol–EtOAc);  $[\alpha]_D +60.9$  (c. 1.05 in  $\text{CHCl}_3$ );  $\nu_{\text{max}}/\text{cm}^{-1}$  (film) 3429, 2919, 2102,

1262 and 1069;  $\delta_{\text{H}}$  (300 MHz,  $\text{CDCl}_3$ ) 7.40-7.20 (15H, m, Ph), 4.96 (1H, d,  $J$  3.6, 1'-H), 4.93-4.85 (3H, m,  $\text{CH}_2\text{Ph}$ ), 4.74 (1H, d,  $J$  11.8,  $\text{CH}_A\text{HPh}$ ), 4.62 (2H, d,  $J$  10.8,  $\text{CH}_2\text{Ph}$ ), 4.11-3.98 (2H, m, 3'-H and 4'-H), 3.63-3.50 (3H, m, 2'-H, 5'-H and 6'-H), 3.47-3.15 (6H, m, 6'-H, 1-H, 2-H, 3-H, 4-H and 6-H), 2.29 (1H, ddd,  $J$  12.8, 4.6 and 4.1, 5- $\text{H}_A$ ) and 1.46 (1H, q,  $J$  12.8, 5- $\text{H}_B$ );  $\delta_{\text{C}}$  (75 MHz,  $\text{CDCl}_3$ ), 138.1 (*o*-Ph $\times$ 3), 129.2, 128.9, 128.5, 128.3, 128.1 (Ph), 101.4 (1'-C), 85.7 (1-C), 82.5 (3'-C), 79.8 (2'-C), 78.7 (5'-C), 76.0, 75.8 (2-C and 3-C), 75.1 ( $\text{CH}_2\text{Ph}$ ), 71.5 (4'-C), 60.1, 59.8 (4-C and 6-C), 51.5 (6'-C) and 32.7 (5-C) (4 aromatic peaks overlapped or missing);  $m/z$  (ES) 694.3 (81%,  $\text{MNa}^+$ ) and 430.2 (100); (Found:  $\text{MNa}^+$ , 694.2736.  $\text{C}_{33}\text{H}_{37}\text{O}_7\text{N}_9$  requires  $\text{MNa}$ , 694.2714).

**(1*R*,2*S*,3*S*,4*R*,6*S*)-1-*O*-(6'-Azido-6'-deoxy-2',3',4'-tri-*O*-benzyl- $\alpha$ -L-glucopyranosyl)-4,6-diazido-cyclohexan-2,3-ol 31A'**

By the same method, **27A'** (50.9 mg, 0.07 mmol) gave **31A'** (39.9 mg, 89%) as a yellow oil;  $R_f$  0.26 (7:3 petrol-EtOAc);  $[\alpha]_{\text{D}} -27.4$  (c. 0.57 in  $\text{CHCl}_3$ );  $\nu_{\text{max}}/\text{cm}^{-1}$  (film) 3437, 2923, 2104, 1260 and 1070;  $\delta_{\text{H}}$  (500 MHz,  $\text{CDCl}_3$ ) 7.45-7.20 (15H, m, Ph), 5.04 (1H, d,  $J$  3.8, 1'-H), 4.98 (1H, d,  $J$  11.1,  $\text{CH}_A\text{HPh}$ ), 4.90 (1H, d,  $J$  11.1,  $\text{CH}_B\text{HPh}$ ), 4.79 (1H, d,  $J$  11.1,  $\text{CHH}_A\text{Ph}$ ), 4.77 (1H, d,  $J$  12.0,  $\text{CH}_C\text{HPh}$ ), 4.71 (1H, d,  $J$  12.0,  $\text{CHH}_C\text{Ph}$ ), 4.57 (1H, d,  $J$  11.1,  $\text{CHH}_B\text{Ph}$ ), 4.06-3.98 (2H, m, 3'-H and 5'-H), 3.61-3.55 (2H, m, 2'-H and 6'- $\text{H}_A$ ), 3.50-3.36 (5H, m, 4'-H, 2-H, 3-H, 4-H and 6-H), 3.33 (1H, dd,  $J$  12.8 and 6.4, 6'- $\text{H}_B$ ), 3.28-3.23 (1H, m, 1-H), 2.28 (1H, dt,  $J$  12.3 and 4.3, 5- $\text{H}_A$ ) and 1.44 (1H, q,  $J$  12.3, 5- $\text{H}_B$ );  $\delta_{\text{C}}$  (125 MHz,  $\text{CDCl}_3$ ) 138.5, 137.8, 137.7 (*o*-Ph), 128.6, 128.5, 128.4, 128.1, 128.0, 127.9, 127.7 (Ph), 98.0 (1'-C), 85.5 (1-C), 81.1 (3'-C), 79.8 (2'-C), 78.1 (4'-C), 75.8 (3-C), 75.7 ( $\text{CH}_2\text{Ph}$ ), 75.3 ( $\text{CH}_2\text{Ph}$ ), 74.7 ( $\text{CH}_2\text{Ph}$ ), 73.6 (2-C), 71.1 (5'-C), 59.7, 59.5 (4-C and 6-C), 51.7 (6'-C) and 32.4 (5-C) (2 aromatic peaks overlapped or missing);  $m/z$  (ES) 694.2 (100%,  $\text{MNa}^+$ ) and 430.2 (78); (Found:  $\text{MNa}^+$ , 694.2681.  $\text{C}_{33}\text{H}_{37}\text{O}_7\text{N}_9$  requires  $\text{MNa}$ , 694.2714).

**(1*R*,2*S*,3*S*,4*R*,6*S*)-1-*O*-(6'-Azido-6'-deoxy-2',3',4'-tri-*O*-benzyl- $\alpha$ -D-glucopyranosyl)-3-*O*-(6''-Azido-6''-deoxy-2'',3'',4''-tri-*O*-benzyl- $\alpha$ -D-glucopyranosyl)-4,6-diazido-cyclohexan-1,2,3-ol 27AA**



By method A, the glycosyl donor **21A** (51 mg, 1.2 eq., 0.09 mmol) and the acceptor **31A** (50 mg, 1.0 eq., 0.08 mmol), gave a crude mixture which was purified by flash chromatography on silica gel (9:1 petrol–EtOAc) to give **27AA** (54 mg, 62%) as a yellow foam,  $R_f$  0.46 (7:3 petrol–EtOAc);  $[\alpha]_D +88.0$  (c. 1.10 in  $\text{CHCl}_3$ ),  $\nu_{\text{max}}/\text{cm}^{-1}$  (film) 3446, 2925, 2103, 1154 and 1070;  $\delta_{\text{H}}$  (500 MHz,  $\text{CDCl}_3$ ) 7.40–7.10 (30H, m, Ph), 5.29 (1H, d,  $J$  3.4, 1''-H), 5.12 (1H, d,  $J$  3.4, 1'-H), 5.01 (1H, d,  $J$  10.7,  $\text{CH}_A\text{HPh}$ ), 4.94 (1H, d,  $J$  11.1,  $\text{CH}_B\text{HPh}$ ), 4.91–4.76 (8H, m,  $\text{CH}_2\text{Ph}$ ), 4.61 (1H, d,  $J$  11.1,  $\text{CH}_C\text{HPh}$ ), 4.57 (1H, d,  $J$  11.1,  $\text{CHH}_D\text{Ph}$ ), 4.34 (1H, ddd,  $J$  9.8, 4.3 and 2.6, 5''-H), 4.09 (1H, ddd,  $J$  9.9, 3.4 and 2.6, 5''-H), 4.01 (1H, dd,  $J$  9.8 and 9.4, 3'-H), 3.97 (1H, dd,  $J$  9.8 and 9.4, 3''-H), 3.61–3.52 (6H, m, 2'-H, 2''-H, 4''-H, 6''-H, 2-H and 4-H), 3.49–3.39 (3H, m, 4'-H, 3-H, and 6''-H), 3.31–3.23 (3H, m, 6'-H, 1-H and 6-H), 3.19 (1H, dd,  $J$  13.2 and 4.3, 6'-H), 2.41 (1H, dt,  $J$  12.4, and 4.3, 5- $\text{H}_A$ ) and 1.61 (1H, q,  $J$  12.4, 5- $\text{H}_B$ );  $\delta_{\text{C}}$  (125 MHz,  $\text{CDCl}_3$ ) 138.7, 138.4, 138.0, 137.9, 137.1, 137.2 (*o*-Ph), 128.7, 128.5, 128.4, 128.3, 128.2, 128.1, 128.0, 127.9, 127.8, 127.7 (Ph), 100.4 (1'-C), 97.5 (1''-C), 84.9 (1-C), 81.8 (3''-C), 81.6 (3'-C), 80.3 (3-C), 79.8 (2'-C and 2''-C), 78.3 (4'-C and 4''-C), 75.6 ( $\text{CH}_2\text{Ph}$ ), 75.4 ( $\text{CH}_2\text{Ph}$ ), 75.3 ( $\text{CH}_2\text{Ph}$ ), 74.4 (2-C), 74.2 ( $\text{CH}_2\text{Ph}$ ), 73.3 ( $\text{CH}_2\text{Ph}$ ), 71.0 (5''-C), 70.2 (5'-C), 60.2 (4-C), 58.9 (6-C), 51.2 (6''-C), 51.1 (6'-C) and 32.2 (5-C) (nine peaks overlapped or missing);  $m/z$  (ES) 1151.9 (100%,  $\text{MNa}^+$ ) and 430.4 (100); (Found:  $\text{MNa}^+$ , 1151.4712.  $\text{C}_{60}\text{H}_{64}\text{O}_{11}\text{N}_{12}$  requires  $\text{MNa}$ , 1151.4715).

**(1*R*,2*S*,3*S*,4*R*,6*S*)-1-*O*-(6'-Azido-6'-deoxy-2',3',4'-tri-*O*-benzyl- $\alpha$ -D-glucopyranosyl)-3-*O*-(6''-Azido-6''-deoxy-2'',3'',4''-tri-*O*-benzyl- $\alpha$ -L-glucopyranosyl)-4,6-diazido-cyclohexan-1,2,3-ol **27AA'****

By method A, the glycosyl donor **21A'** (67 mg, 1.2 eq., 0.12 mmol) and the acceptor **31A** gave a crude mixture was purified by flash chromatography on silica gel (9:1 petrol–EtOAc) to give **27AA'** (56 mg, 50%) as a yellow foam,  $R_f$  0.55 (7:3 petrol–EtOAc);  $\nu_{\text{max}}/\text{cm}^{-1}$  (film) 3421, 2923, 2102, 1152 and 1069;  $\delta_{\text{H}}$  (500 MHz,  $\text{CDCl}_3$ ) 7.40–7.20 (30H, m, Ph), 5.35 (2H, d,  $J$  3.7, 1'-H and 1''-H), 4.94 (2H, d,  $J$  10.9,  $\text{CH}_A\text{HPh}$ ), 4.90 (2H, d,  $J$  11.4,  $\text{CH}_B\text{HPh}$ ), 4.84 (2H, d,  $J$  10.9,  $\text{CHH}_A\text{Ph}$ ), 4.65 (2H, d,  $J$  11.3,  $\text{CH}_C\text{HPh}$ ), 4.62 (2H, d,  $J$  11.4,  $\text{CHH}_B\text{Ph}$ ), 4.59 (2H, d,  $J$  11.3,  $\text{CHH}_C\text{Ph}$ ), 4.14 (2H, ddd,  $J$  9.9, 3.9 and 2.5, 5'-H and 5''-H),

4.06 (2H, t,  $J$  9.3, 4'-H and 4''-H), 3.74 (1H, t,  $J$  8.6, 2-H), 3.60-3.50 (6H, m, 2'-H, 2''-H, 4'-H, 4''-H, 6'-H<sub>A</sub> and 6''-H<sub>A</sub>), 3.45-3.37 (4H, m, 1-H, 3-H, 4-H and 6-H), 3.35 (2H, dd,  $J$  10.0 and 4.2, 6'-H<sub>B</sub> and 6''-H<sub>B</sub>), 2.41 (1H, dt,  $J$  12.6, and 4.1, 5-H<sub>A</sub>) and 1.60 (1H, q,  $J$  12.6, 5-H<sub>B</sub>);  $\delta_C$  (125 MHz, CDCl<sub>3</sub>) 138.5, 137.9, 137.2 (*o*-Ph), 128.5, 128.4, 128.2, 128.1, 127.9, 127.8, 127.7 (Ph), 98.8 (1'-C and 1''-C), 82.0-81.8 (1-C, 3-C, 3'-C and 3''-C), 79.8 (2'-C and 2''-C), 78.1 (4'-C and 4''-C), 76.7 (2-C), 75.7 (CH<sub>2</sub>Ph), 75.2 (CH<sub>2</sub>Ph), 73.7 (CH<sub>2</sub>Ph), 70.8 (5'-C and 5''-C), 58.9 (4-C and 6-C), 51.3 (6'-C and 6''-C) and 32.4 (5-C) (2 aromatic peaks overlapped or missing);  $m/z$  (ES) 1151.6 (20%, MNa<sup>+</sup>), and 947.4 (100, M-2Bn); (Found: MNa<sup>+</sup>, 1151.4724. C<sub>60</sub>H<sub>64</sub>O<sub>11</sub>N<sub>12</sub> requires MNa, 1151.4715).

**(1R,2S,3S,4R,6S)-1-O-(6'-Azido-6'-deoxy-2',3',4'-tri-O-benzyl- $\alpha$ -L-glucopyranosyl)-3-O-(6''-Azido-6''-deoxy-2'',3'',4''-tri-O-benzyl- $\alpha$ -D-glucopyranosyl)-4,6-diazidocyclohexan-1,2,3-ol 27A'A**

By method A, the glycosyl donor **21A** (91 mg, 1.2 eq., 0.16 mmol) and the acceptor **31A'** (89 mg, 1.0 eq., 0.13 mmol) gave a crude product which was purified by flash chromatography on silica gel (9:1 petrol–EtOAc) to give **27A'A** (31 mg, 21%) as a yellow foam,  $R_f$  0.44 (7:3 petrol–EtOAc);  $\nu_{\max}/\text{cm}^{-1}$  (film) 3469, 2923, 2104 and 1070;  $\delta_H$  (500 MHz, CDCl<sub>3</sub>)  $\delta_H$  (500 MHz, CDCl<sub>3</sub>) 7.40-7.20 (30H, m, Ph), 5.21 (2H, d,  $J$  3.9, 1'-H and 1''-H), 4.98 (2H, d,  $J$  11.1, CH<sub>A</sub>HPh), 4.89 (2H, d,  $J$  11.1, CH<sub>B</sub>HPh), 4.79 (2H, d,  $J$  11.1, CHH<sub>B</sub>Ph), 4.78 (2H, d,  $J$  11.5, CH<sub>C</sub>HPh), 4.74 (2H, d,  $J$  11.5, CHH<sub>C</sub>Ph), 4.58 (2H, d,  $J$  11.1, CHH<sub>A</sub>Ph), 4.25-4.19 (2H, m, 5'-H and 5''-H), 3.99 (2H, dd,  $J$  9.4 and 8.9, 3'-H and 3''-H), 3.60-3.48 (8H, m, 2'-H, 2''-H, 4'-H, 4''-H, 6'-H<sub>A</sub>, 6''-H<sub>A</sub>, 4-H and 6-H), 3.46 (1H, t,  $J$  9.4, 2-H), 3.36 (2H, t,  $J$  9.4, 1-H and 3-H), 3.33 (2H, dd,  $J$  13.2 and 5.1, 6'-H<sub>B</sub> and 6''-H<sub>B</sub>), 2.34 (1H, ddd,  $J$  12.8, 4.7 and 4.1, 5-H<sub>A</sub>) and 1.53 (1H, q,  $J$  12.8, 5-H<sub>B</sub>);  $\delta_C$  (125 MHz, CDCl<sub>3</sub>) 138.6, 137.9, 137.8 (*o*-Ph), 128.5, 128.4, 128.0, 127.9 (Ph), 97.6 (1'-C and 1''-C), 82.9 (1-C and 3-C), 81.4 (3'-C and 3''-C), 79.8 (2'-C and 2''-C), 78.2 (4'-C and 4''-C), 75.6 (CH<sub>2</sub>Ph), 75.2 (CH<sub>2</sub>Ph), 73.5, 73.2 (CH<sub>2</sub>Ph and 2-C), 70.7 (5'-C and 5''-C), 59.7 (4-C and 6-C), 51.4 (6'-C and 6''-C) and 29.7 (5-C) (five aromatic peaks overlapped or missing);  $m/z$  (ES) 1151.6 (65%, MNa<sup>+</sup>) and 430.3 (100); (Found: MNa<sup>+</sup>, 1151.4711. C<sub>60</sub>H<sub>64</sub>O<sub>11</sub>N<sub>12</sub> requires MNa, 1151.4715).

**(1*R*,2*S*,3*S*,4*R*,6*S*)-1-*O*-(6'-Azido-6'-deoxy-2',3',4'-tri-*O*-benzyl- $\alpha$ -L-glucopyranosyl)-3-*O*-(6''-Azido-6''-deoxy-2'',3'',4''-tri-*O*-benzyl- $\alpha$ -L-glucopyranosyl)-4,6-diazido-cyclohexan-1,2,3-ol 27A'A'**

By method A, the glycosyl donor **21A'** (119 mg, 1.2 eq., 0.21 mmol) and the acceptor **31A'** (117 mg, 1.0 eq., 0.17 mmol) gave a crude product which was purified by flash chromatography on silica gel (9:1 petrol–EtOAc) to give **27A'A'** (49 mg, 26%) as a yellow oil,  $[\alpha]_D -71.6$  (c. 0.91 in CHCl<sub>3</sub>), spectroscopically identical to **27AA** reported previously.

**(1*R*,2*S*,3*S*,4*R*,6*S*)-1-*O*-(6'-Azido-6'-deoxy-2',3',4'-tri-*O*-benzyl- $\alpha$ -D-glucopyranosyl)-3-*O*-(6''-Azido-6''-deoxy-2'',3'',4''-tri-*O*-benzoyl- $\beta$ -D-glucopyranosyl)-4,6-diazido-cyclohexan-1,2,3-ol 27AB**

By method A, the glycosyl donor **21B** (85 mg, 1.2 eq., 0.14 mmol) and the acceptor **31A** (78 mg, 1.0 eq., 0.12 mmol) gave a crude product which was purified by flash chromatography on silica gel (7:3 petrol–EtOAc) and preparative HPLC to give **27AB** (69 mg, 51%) as a colourless foam,  $R_f$  0.45 (7:3 petrol–EtOAc);  $[\alpha]_D +32.1$  (c. 0.09 in CHCl<sub>3</sub>);  $\nu_{\max}/\text{cm}^{-1}$  (film) 3460, 2920, 2104, 1736, 1261 and 1068;  $\delta_H$  (500 MHz, CDCl<sub>3</sub>) 7.94 (2H, dd,  $J$  7.2 and 1.1, Bz), 7.88 (2H, dd,  $J$  7.2 and 1.1, Bz), 7.84 (2H, dd,  $J$  7.2 and 1.1, Bz), 7.55–7.20 (24H, m, Ph), 5.89 (1H, t,  $J$  9.5, 3''-H), 5.51–5.46 (2H, m, 2''-H and 4''-H), 5.45 (1H, d,  $J$  8.0, 1''-H), 4.94 (1H, d,  $J$  3.5, 1'-H), 4.91 (1H, d,  $J$  10.9, CH<sub>A</sub>HPh), 4.90–4.81 (3H, m, CH<sub>B</sub>HPh, CH<sub>C</sub>HPh and CHH<sub>C</sub>·Ph), 4.73 (1H, d,  $J$  11.1, CHH<sub>B</sub>·Ph), 4.60 (1H, d,  $J$  10.9, CHH<sub>A</sub>·Ph), 4.54 (1H, d,  $J$  1.2, OH), 4.03–3.97 (2H, m, 5'-H and 5''-H), 3.92 (1H, t,  $J$  9.3, 3'-H), 3.81 (1H, t,  $J$  9.4, 3-H), 3.64–3.58 (2H, m, 2'-H and 6''-H), 3.58–3.52 (2H, m, 4'-H and 6'-H), 3.43–3.37 (3H, m, 6'-H, 2-H and 4-H), 3.35 (1H, dd,  $J$  13.7 and 2.1, 6''-H), 3.16–3.02 (2H, m, 1-H and 6-H), 2.24–2.15 (1H, m, 5-H<sub>A</sub>) and 1.45–1.33 (1H, m, 5-H<sub>B</sub>);  $\delta_C$  (125 MHz, CDCl<sub>3</sub>) 165.8, 165.4 (3×C=O Bz), 138.3, 137.8, 136.6 (*o*-Ph), 133.7, 133.3, 133.0 (*o*-Bz), 129.9, 129.8, 129.5, 129.0, 128.9, 128.8, 128.7, 128.6, 128.5, 128.3, 128.2, 128.0, 127.9, 127.8, 127.6 (Ph), 101.2 (1'-C), 100.3 (1''-C), 86.2 (1-C), 82.1 (3'-C), 80.3 (3-C), 79.7 (2'-C), 78.2 (4'-C), 76.2 (2-C), 75.6 (CH<sub>2</sub>Ph), 75.3 (CH<sub>2</sub>Ph), 75.0 (CH<sub>2</sub>Ph), 74.2 (5'-C), 72.7 (3''-C), 72.1 (4''-C), 71.0 (5''-C),

70.5 (2''-C), 58.9 (6-C), 57.9 (4-C), 51.5, 51.1 (6'-C and 6''-C) and 32.3 (5-C) (three aromatic peaks overlapped or missing);  $m/z$  (ES) 1194.2 (24%,  $MNa^+$ ) and 429.8 (98); (Found:  $MNa^+$ , 1193.4080.  $C_{60}H_{58}O_{14}N_{12}$  requires  $MNa$ , 1193.4093).

**(1*R*,2*S*,3*S*,4*R*,6*S*)-1-*O*-(6'-Azido-6'-deoxy-2',3',4'-tri-*O*-benzyl- $\alpha$ -D-glucopyranosyl)-3-*O*-(6''-Azido-6''-deoxy-2'',3'',4''-tri-*O*-benzoyl- $\beta$ -L-glucopyranosyl)-4,6-diazido-cyclohexan-1,2,3-ol 27AB'**

By method A, the glycosyl donor **21B'** (85 mg, 1.2 eq., 0.14 mmol) and the acceptor **31A** (78 mg, 1.0 eq., 0.12 mmol) gave a crude product which was purified by flash chromatography on silica gel (7:3 petrol–EtOAc) and preparative HPLC to give **27AB'** (38 mg, 28%) as a colourless foam,  $R_f$  0.48 (7:3 petrol–EtOAc);  $[\alpha]_D^{+45.3}$  (c. 0.98 in  $CHCl_3$ );  $\nu_{max}/cm^{-1}$  (film) 3475, 2926, 2104, 1733, 1261 and 1069;  $\delta_H$  (500 MHz,  $CDCl_3$ ) 7.99 (2H, dd,  $J$  7.3 and 1.0, Bz), 7.92 (2H, dd,  $J$  7.3 and 1.0, Bz), 7.81 (2H, br d,  $J$  7.3, Bz), 7.56–7.23 (24H, m, Ph), 5.91 (1H, t,  $J$  9.7, 3''-H), 5.57 (1H, dd,  $J$  9.7 and 8.0, 2''-H), 5.55 (1H, d,  $J$  3.8, 1'-H), 5.50 (1H, t,  $J$  9.7, 4''-H), 5.14 (1H, d,  $J$  8.0, 1''-H), 4.98 (1H, d,  $J$  10.9,  $CH_A$ HPh), 4.90 (1H, d,  $J$  11.2,  $CH_B$ HPh), 4.86 (1H, d,  $J$  11.7,  $CH_C$ HPh), 4.80 (1H, d,  $J$  10.9,  $CH_H$ A·Ph), 4.73 (1H, d,  $J$  11.7,  $CH_H$ C·Ph), 4.59 (1H, d,  $J$  11.2,  $CH_H$ B·Ph), 4.15 (1H, ddd,  $J$  9.9, 4.4 and 2.3, 5'-H), 4.00 (1H, t,  $J$  9.3, 3'-H), 3.94 (1H, ddd,  $J$  9.7, 6.9 and 2.7, 5''-H), 3.75 (1H, dd,  $J$  8.6 and 8.3, 2-H), 3.57 (1H, dd,  $J$  9.3 and 3.8, 1'-H), 3.53–3.47 (5H, m, 4'-H, 6'-H, 6''-H and 1-H), 3.47–3.34 (4H, m, 6'-H, 3-H, 4-H and 6-H), 2.32–2.25 (1H, m, 5-H<sub>A</sub>) and 1.52 (1H, q,  $J$  12.4, 5-H<sub>B</sub>);  $\delta_C$  (125 MHz,  $CDCl_3$ ) 165.7, 165.3, 165.1 (C=O Bz), 138.7, 138.1, 137.7 (*o*-Ph), 133.8, 133.4 (*o*-Bz), 129.9, 129.8, 129.1, 128.7, 128.6, 128.5, 128.4, 128.3, 128.0, 127.9, 127.8 (Ph), 101.5 (1''-C), 97.9 (1'-C), 84.5 (3-C), 81.5 (3'-C), 80.5 (1-C), 79.4 (2'-C), 78.1 (4'-C), 75.7 ( $C_A$ H<sub>2</sub>Ph), 75.1 ( $C_B$ H<sub>2</sub>Ph), 74.8 (2-C), 73.8 (5''-C), 72.9 ( $C_C$ H<sub>2</sub>Ph), 72.6 (3''-C), 71.7 (2''-C), 70.7 (5'-C), 69.9 (4''-C), 59.2, 58.7 (4-C and 6-C), 51.4, 51.3 (6'-C and 6''-C) and 32.1 (5-C) (eight aromatic peaks overlapped or missing);  $m/z$  (ES) 1193.7 (52%,  $MNa^+$ ) and 430.3 (100); (Found:  $MNa^+$ , 1193.4125.  $C_{60}H_{58}O_{14}N_{12}$  requires  $MNa$ , 1193.4093).

**(1*R*,2*S*,3*S*,4*R*,6*S*)-1-*O*-(6'-Azido-6'-deoxy-2',3',4'-tri-*O*-benzyl- $\alpha$ -L-glucopyranosyl)-3-*O*-(6''-Azido-6''-deoxy-2'',3'',4''-tri-*O*-benzoyl- $\beta$ -D-glucopyranosyl)-4,6-diazido-cyclohexan-1,2,3-ol 27A'B**

By method A, the donor **21B** (88 mg, 1.2 eq., 0.15 mmol) and the acceptor **31A'** (81 mg, 1.0 eq., 0.12 mmol) gave a crude product which was purified by flash chromatography on silica gel (7:3 petrol–EtOAc) and preparative HPLC to give **27A'B** (45 mg, 32%) as a colourless foam;  $R_f$  0.38 (7:3 petrol/EtOAc);  $[\alpha]_D -32.4$  (c. 1.00 in CHCl<sub>3</sub>);  $\nu_{\max}/\text{cm}^{-1}$  (film) 3461, 2924, 2106, 1733, 1261 and 1069;  $\delta_H$  (500 MHz, CDCl<sub>3</sub>) 7.95 (2H, d,  $J$  7.3, Bz), 7.91 (2H, d,  $J$  7.4, Bz), 7.80 (2H, d,  $J$  7.4, 3''C-Bz), 7.52 (1H, dd,  $J$  7.5 and 7.4, Ph), 7.44-7.21 (23H, m, Ph), 5.90 (1H, t,  $J$  9.6, 3''-H), 5.51 (1H, dd,  $J$  9.6 and 8.0, 2''-H), 5.49 (1H, t,  $J$  9.6, 4''-H), 5.43 (1H, d,  $J$  8.0, 1''-H), 5.01 (1H, d,  $J$  3.5, 1'-H), 4.93 (1H, d,  $J$  10.9, 3'C-CH<sub>A</sub>HPh), 4.89 (1H, d,  $J$  10.9, 4'C-CH<sub>B</sub>HPh), 4.75 (1H, d,  $J$  10.9, 3'C-CH<sub>A</sub>Ph), 4.70 (2H, s, 2'C-CH<sub>2</sub>Ph), 4.54 (1H, d,  $J$  10.9, 4'C-CH<sub>B</sub>Ph), 4.00 (1H, ddd,  $J$  9.7, 7.5 and 2.2, 5''-H), 3.90 (1H, t,  $J$  9.4, 3'-H), 3.89-3.84 (1H, m, 5'-H), 3.76-3.70 (2H, m, OH and 3-H), 3.60 (1H, dd,  $J$  13.4 and 7.5, 6''-H<sub>A</sub>), 3.54 (1H, dd,  $J$  9.4 and 3.5, 2'-H), 3.46 (1H, dd,  $J$  9.6 and 9.3, 4'-H), 3.45-3.33 (4H, m, 2-H, 4-H, 6-H and 6''-H<sub>B</sub>), 3.23 (1H, t,  $J$  9.4, 1-H), 3.14 (2H, d,  $J$  3.5, 6'-H), 2.17 (1H, dt,  $J$  13.5 and 4.5, 5-H<sub>A</sub>) and 1.57 (1H, m, 5-H<sub>B</sub>);  $\delta_C$  (125 MHz, CDCl<sub>3</sub>) 165.8, 165.3, 165.0 (C=O Bz), 138.5, 137.7 (*o*-Ph), 133.6, 133.3, 133.2 (*o*-Bz), 129.9, 129.8, 129.7, 129.3, 128.8, 128.6, 128.5, 128.4, 128.3, 128.0, 127.9, 127.7 (Ph), 100.8 (1''-C), 98.3 (1'-C), 85.4 (1-C), 81.3 (3-C), 80.9 (3'-C), 79.6 (2'-C<sub>2</sub>), 77.7 (4'-C), 75.6 (3''-CCH<sub>2</sub>Ph), 75.3 (4''-CCH<sub>2</sub>Ph), 75.2 (2-C), 74.1 (5''-C), 73.5 (2''-CCH<sub>2</sub>Ph), 72.7 (3''-C), 72.3 (2''-C), 71.0 (5'-C), 70.3 (4''-C), 59.5 (6-C), 58.0 (4-C), 51.5 (6''-C), 51.0 (6'-C) and 32.4 (5-C) (seven aromatic peaks overlapped or missing);  $m/z$  (ES) 1193.6 (55%, MNa<sup>+</sup>), 1151.7 (57) and 430.3 (100); (Found: MNa<sup>+</sup>, 1193.4102. C<sub>60</sub>H<sub>58</sub>O<sub>14</sub>N<sub>12</sub> requires MNa, 1193.4093).

**(1*R*,2*S*,3*S*,4*R*,6*S*)-1-*O*-(6'-Azido-6'-deoxy-2',3',4'-tri-*O*-benzyl- $\alpha$ -L-glucopyranosyl)-3-*O*-(6''-Azido-6''-deoxy-2'',3'',4''-tri-*O*-benzoyl- $\beta$ -L-glucopyranosyl)-4,6-diazido-cyclohexan-1,2,3-ol 27A'B'**

By method A, the glycosyl donor **21B'** (88 mg, 1.2 eq., 0.15 mmol) and the acceptor **31A'** (81 mg, 1.0 eq., 0.12 mmol) gave a crude product which was purified by flash chromatography on silica gel (7:3 petrol–EtOAc) and preparative HPLC to give **27A'B'** (36 mg, 26%) as a colourless foam;  $R_f$  0.32 (7:3 petrol–EtOAc);  $[\alpha]_D -29.6$  (c. 1.00 in  $\text{CHCl}_3$ );  $\nu_{\text{max}}/\text{cm}^{-1}$  (film) 3490, 2924, 2104, 1735, 1261 and 1092;  $\delta_{\text{H}}$  (500 MHz,  $\text{CDCl}_3$ ) 8.00 (2H, d,  $J$  7.5, Bz), 7.92 (2H, d,  $J$  7.5, Bz), 7.81 (2H, d,  $J$  7.5, 3''C-Bz), 7.56–7.49 (2H, m, Ph), 7.45–7.23 (22H, m, Ph), 5.90 (1H, t,  $J$  9.7, 3''-H), 5.54 (1H, dd,  $J$  9.7 and 8.0, 2''-H), 5.48 (1H, t,  $J$  9.7, 4''-H), 5.32 (1H, d,  $J$  3.6, 1'-H), 5.07 (1H, d,  $J$  8.0, 1''-H), 4.98 (1H, d,  $J$  10.9, 3'-CCH<sub>A</sub>HPh), 4.89 (1H, d,  $J$  11.1, 4'-CCH<sub>B</sub>HPh), 4.84 (1H, d,  $J$  11.8, 2'-CCH<sub>C</sub>HPh), 4.82 (1H, d,  $J$  10.9, 3'-CCH<sub>H<sub>A</sub></sub>Ph), 4.74 (1H, d,  $J$  11.8, 2'-CCH<sub>H<sub>C</sub></sub>Ph), 4.60 (1H, d,  $J$  11.1, 4'-CCH<sub>H<sub>B</sub></sub>Ph), 4.51–4.44 (1H, m, 5'-H), 4.00 (1H, t,  $J$  9.4, 3''-H), 3.99–3.94 (1H, m, 5''-H), 3.68 (1H, d,  $J$  1.2, OH), 3.61–3.49 (6H, m, 2-H, 6-H, 2'-H, 6'-H<sub>A</sub> and 6''-H), 3.49 (1H, t,  $J$  9.5, 4'-H), 3.44 (1H, t,  $J$  9.4, 1-H), 3.40–3.32 (3H, m, 3-H, 4-H and 6'-H<sub>B</sub>), 2.31–2.23 (1H, m, 5-H<sub>A</sub>) and 1.58–1.49 (1H, m, 5-H<sub>B</sub>);  $\delta_{\text{C}}$  (125 MHz,  $\text{CDCl}_3$ ) 165.7, 165.3, 165.1 (C=O Bz), 138.7, 138.1, 137.9 (*o*-Ph), 133.8, 133.4 (*o*-Bz), 129.9, 129.8, 129.0, 128.6, 128.5, 128.4, 128.3, 128.0, 127.9, 127.8, 127.6 (Ph), 101.9 (1''-C), 97.5 (1'-C), 85.7 (3-C), 81.6 (3'-C), 80.1 (1-C), 79.7 (2'-C), 78.2 (4'-C), 75.6 (3'-CCH<sub>2</sub>Ph), 75.1 (4'-CCH<sub>2</sub>Ph), 73.6 (5''-C), 73.2 (2'-CCH<sub>2</sub>Ph), 72.6 (3''-C), 72.5 (2-C), 71.7 (2''-C), 70.2 (5'-C), 69.9 (4''-C), 59.9 (6-C), 59.0 (4-C), 51.4 (6''-C), 51.1 (6'-C) and 31.8 (5-C) (eight aromatic peaks overlapped or missing);  $m/z$  (ES) 1193.6 (75%,  $\text{MNa}^+$ ), 1188.7 (55) and 430.3 (100); (Found:  $\text{MNa}^+$ , 1193.4081.  $\text{C}_{60}\text{H}_{58}\text{O}_{14}\text{N}_{12}$  requires  $\text{MNa}$ , 1193.4093).

**(1*R*,2*S*,3*S*,4*R*,6*S*)-1-*O*-(6'-Azido-6'-deoxy-2',3',4'-tri-*O*-benzyl- $\alpha$ -D-glucopyranosyl)-3-*O*-(3''-Azido-3''-deoxy-2'',4'',6''-tri-*O*-benzyl- $\alpha$ -D-glucopyranosyl)-4,6-diazido-cyclohexan-1,2,3-ol 27AC**

By method A, the glycosyl donor **21C** (79 mg, 1.2 eq., 0.14 mmol) and the acceptor **31A** (78 mg, 1.0 eq., 0.12 mmol), gave a crude product which was purified by flash chromatography on silica gel (8:2 petrol–EtOAc) and preparative HPLC to give **27AC** (40 mg, 30%) as a colourless foam,  $R_f$  0.58 (7:3 petrol–EtOAc);  $[\alpha]_D +76.7$  (c. 0.97 in  $\text{CHCl}_3$ );  $\nu_{\text{max}}/\text{cm}^{-1}$  (film) 3453, 2924, 2106, 1154 and 1071;  $\delta_{\text{H}}$  (500 MHz,  $\text{CDCl}_3$ ) 7.48–7.10 (30H, m,

Ph), 5.27 (1H, d,  $J$  3.5, 1''-H), 5.11 (1H, d,  $J$  3.5, 1'-H), 4.90 (1H, d,  $J$  10.9, 3'-CCH<sub>A</sub>HPh), 4.89 (1H, d,  $J$  11.0, 2''-CCH<sub>B</sub>HPh), 4.84 (1H, d,  $J$  10.9, 3'-CCHH<sub>A</sub>·Ph), 4.82 (1H, d,  $J$  11.9, CH<sub>C</sub>HPh), 4.79 (1H, d,  $J$  10.5, 4''-CCH<sub>D</sub>HPh), 4.73 (1H, d,  $J$  11.9, CHH<sub>C</sub>·Ph), 4.69 (1H, d,  $J$  11.7, CH<sub>E</sub>HPh), 4.65 (1H, d,  $J$  11.7, CHH<sub>E</sub>·Ph), 4.60 (1H, d,  $J$  11.0, 2''-CCHH<sub>B</sub>·Ph), 4.55 (1H, d,  $J$  12.1, 6''-CCH<sub>F</sub>HPh), 4.42 (1H, d,  $J$  10.5, 4''-CCHH<sub>D</sub>·Ph), 4.36 (1H, d,  $J$  12.1, 6''-CCHH<sub>F</sub>·Ph), 4.26 (1H, m, 5''-H), 4.09 (1H, ddd,  $J$  9.8, 3.3 and 2.7, 5'-H), 3.98 (1H, t,  $J$  9.4, 3'-H), 3.89 (1H, t,  $J$  9.9, 3''-H), 3.59 (1H, dd,  $J$  10.9 and 2.8, 6''-H), 3.56-3.49 (5H, m, 2'-H, 4'-H, 6'-H, 2-H and 6-H), 3.49-3.43 (2H, m, 4''-H and 6''-H), 3.43-3.36 (3H, m, 2''-H, 6'-H and 1-H), 3.31-3.22 (2H, m, 3-H and 4-H), 2.40-2.34 (1H, m, 5-H<sub>A</sub>) and 1.57 (1H, q,  $J$  12.5, 5-H<sub>B</sub>);  $\delta_C$  (125 MHz, CDCl<sub>3</sub>) 138.4, 137.9, 137.7, 137.4, 137.1 (*o*-Ph), 128.7, 128.5, 128.4, 128.3, 128.2, 128.1, 128.0, 127.9, 127.8, 127.7 (Ph), 100.0 (1''-C), 96.9 (1'-C), 84.3 (3-C), 81.8 (3'-C), 80.7 (1-C), 79.6, 78.2 (2'-C and 4'-C), 77.3 (2''-C), 76.3 (4''-C), 75.6 (C<sub>A</sub>H<sub>2</sub>Ph), 75.3 (C<sub>D</sub>H<sub>2</sub>Ph), 75.1 (C<sub>B</sub>H<sub>2</sub>Ph), 74.6 (2-C), 74.0 (C<sub>E</sub>H<sub>2</sub>Ph), 73.6 (C<sub>F</sub>H<sub>2</sub>Ph), 72.9 (C<sub>C</sub>H<sub>2</sub>Ph), 70.9 (5''-C), 70.4 (5''-C), 68.0 (6''-C), 65.4 (3''-C), 60.2 (6-C), 58.8 (4-C), 51.2 (6'-C) and 32.2 (5-C) (nine aromatic peaks overlapped or missing);  $m/z$  (ES) 1151.4 (71%, MNa<sup>+</sup>), 586.8 (41) and 429.8 (100); (Found: MNa<sup>+</sup>, 1151.4667. C<sub>60</sub>H<sub>64</sub>O<sub>11</sub>N<sub>12</sub> requires MNa, 1151.4715).

Also obtained was (1*R*,2*S*,3*S*,4*R*,6*S*)-1-*O*-(6'-Azido-6'-deoxy-2',3',4'-tri-*O*-benzyl- $\alpha$ -D-glucopyranosyl)-3-*O*-(3''-Azido-3''-deoxy-2'',4'',6''-tri-*O*-benzyl- $\beta$ -D-glucopyranosyl)-4,6-diazido-cyclohexan-1,2,3-ol **27Ad** (15 mg, 11%) as a colourless foam,  $R_f$  0.58 (7:3 petrol-EtOAc);  $[\alpha]_D^{+25}$  +52.4 (c. 1.16 in CHCl<sub>3</sub>);  $\nu_{\max}/\text{cm}^{-1}$  (film) 3429, 2922, 2104, 1151 and 1070;  $\delta_H$  (500 MHz, CDCl<sub>3</sub>) 7.40-7.20 (30H, m, Ph), 5.04 (1H, d,  $J$  3.5, 1'-H), 4.96 (1H, d,  $J$  10.9, CH<sub>A</sub>HPh), 4.91 (1H, d,  $J$  8.0, 1''-H), 4.90 (1H, d,  $J$  11.2, CH<sub>B</sub>HPh), 4.89 (1H, d,  $J$  10.9, CHH<sub>A</sub>·Ph), 4.85 (1H, d,  $J$  11.5, CH<sub>C</sub>HPh), 4.81 (1H, d,  $J$  10.7, CH<sub>D</sub>HPh), 4.77 (1H, d,  $J$  11.5, CHH<sub>C</sub>·Ph), 4.76 (1H, d,  $J$  11.6, CH<sub>E</sub>HPh), 4.68 (1H, d,  $J$  12.1, 6''-CCH<sub>F</sub>HPh), 4.66 (1H, d,  $J$  11.6, CHH<sub>E</sub>·Ph), 4.64-4.57 (3H, m, 6''-CCHH<sub>F</sub>·Ph, CHH<sub>D</sub>·Ph and CHH<sub>B</sub>·Ph), 4.10-4.08 (1H, m, 5'-H), 4.01 (1H, t,  $J$  9.4, 3'-H), 3.81-3.73 (2H, m, 5''-H and 6''-H), 3.70 (1H, t,  $J$  9.5, 3-H), 3.60-3.54 (3H, m, 2'-H, 3''-H and 6'-H), 3.54-3.46 (4H, m, 4'-H, 4''-H, 6''-H, and 2-H), 3.41 (1H, dd,  $J$  13.2 and 4.2, 6'-H), 3.34-3.20 (3H, m, 2''-H, 4-H and 6-H), 3.17 (1H, dd,  $J$  9.7 and 9.2, 1-H), 2.25 (1H, dt,  $J$  13.4 and 4.4, 5-H<sub>A</sub>) and 1.43-1.34 (1H, m, 5-H<sub>B</sub>);  $\delta_C$  (125 MHz,

CDCl<sub>3</sub>) 138.3, 137.9, 137.7, 137.4, 136.7 (*o*-Ph), 128.7, 128.6, 128.5, 128.4, 128.3, 128.2, 128.1, 128.0, 127.9, 127.7, 127.6 (Ph), 102.6 (1''-C), 100.2 (1'-C), 84.2 (1-C), 82.0 (3'-C), 80.3, 80.2 (3-C and 2''-C), 79.2 (2'-C), 78.2 (4'-C), 76.5 (2-C), 76.4 (4''-C), 75.6 (CH<sub>2</sub>Ph), 74.9 (CH<sub>2</sub>Ph), 74.5 (CH<sub>2</sub>Ph), 74.2 (CH<sub>2</sub>Ph), 73.5 (CH<sub>2</sub>Ph), 70.9 (6''-CCH<sub>2</sub>Ph), 70.9 (5'-C), 68.6 (3''-C, 5''-C and 6''-C), 59.1 (6-C), 58.4 (4-C), 50.8 (6'-C) and 32.3 (5-C) (eight aromatic peaks overlapped or missing); *m/z* (ES) 1151.2 (12%, MNa<sup>+</sup>) and 430.1 (100); (Found: MNa<sup>+</sup>, 1151.4734. C<sub>60</sub>H<sub>64</sub>O<sub>11</sub>N<sub>12</sub> requires *MNa*, 1151.4715).

**(1*R*,2*S*,3*S*,4*R*,6*S*)-1-*O*-(6'-Azido-6'-deoxy-2',3',4'-tri-*O*-benzyl- $\alpha$ -D-glucopyranosyl)-3-*O*-(3''-Azido-3''-deoxy-2'',4'',6''-tri-*O*-acetoxy- $\beta$ -D-glucopyranosyl)-4,6-diazido-cyclohexan-1,2,3-ol 27AD**

By method A, the glycosyl donor **21D** (59 mg, 1.2 eq., 0.14 mmol) and the acceptor **31A** (78 mg, 1.0 eq., 0.12 mmol), gave a crude product which was purified by flash chromatography on silica gel (gradient elution 8:2 to 7:3 to 6:4 petrol–EtOAc) to give **27AD** (61 mg, 54%) as a colourless foam, *R<sub>f</sub>* 0.40 (6:4 petrol–EtOAc); [ $\alpha$ ]<sub>D</sub> +27.3 (c. 0.06 in CHCl<sub>3</sub>);  $\nu_{\max}$ /cm<sup>-1</sup> (film) 3412, 2920, 2106, 1749, 1223 and 1068;  $\delta_{\text{H}}$  (500 MHz, CDCl<sub>3</sub>) 7.40-7.20 (15H, m, Ph), 5.03 (1H, t, *J* 10.1, 4''-H), 5.00 (1H, d, *J* 3.5, 1'-H), 4.92-4.88 (4H, m, 1''-H, 2''-H, CH<sub>A</sub>HPh and CH<sub>B</sub>HPh), 4.87 (2H, d, *J* 10.8, CHH<sub>A</sub>'Ph and CH<sub>C</sub>HPh), 4.75 (1H, d, *J* 11.5, CHH<sub>B</sub>'Ph), 4.62 (1H, d, *J* 10.8, CHH<sub>C</sub>'Ph), 4.36 (1H, br s, OH), 4.22 (2H, d, *J* 3.4, 6''-H), 4.09-4.04 (1H, m, 5'-H), 4.01 (1H, dd, *J* 9.8 and 9.3, 3'-H), 3.69-3.64 (1H, m, 5''-H), 3.64-3.58 (3H, m, 2'-H, 3''-H and 4'-H), 3.58-3.52 (2H, m, 6'-H and 3-H), 3.48 (1H, dd, *J* 9.1 and 8.4, 2-H), 3.42 (1H, dd, *J* 13.3 and 3.9, 6'-H), 3.38-3.31 (1H, m, 4-H), 3.24-3.18 (1H, m, 6-H), 3.14 (1H, dd, *J* 9.6 and 9.1, 1-H), 2.28-2.22 (1H, m, 5-H<sub>A</sub>), 2.14 (3H, s, 4''-COCOCH<sub>3</sub>), 2.08 (3H, s, 6''-COCOCH<sub>3</sub>), 1.95 (3H, s, 2''-COCOCH<sub>3</sub>) and 1.43-1.33 (1H, m, 5-H<sub>B</sub>);  $\delta_{\text{C}}$  (125 MHz, CDCl<sub>3</sub>) 170.8, 169.2, 169.1 (C=O), 138.2, 137.7, 136.9 (*o*-Ph), 128.7, 128.6, 128.5, 128.4, 128.0, 127.9, 127.8, 127.6 (Ph), 100.9 (1''-C and 1'-C), 85.6 (1-C), 82.0 (3'-C), 81.6 (3-C), 79.7, 78.4 (2'-C and 4'-C), 75.9 (2-C), 75.6 (CH<sub>2</sub>Ph), 75.3 (CH<sub>2</sub>Ph), 74.9 (CH<sub>2</sub>Ph), 72.4 (5''-C), 71.6 (2''-C), 71.1 (5'-C), 68.5 (4''-C), 64.4 (3''-C), 61.9 (6''-C), 58.9 (6-C), 58.3 (4-C), 51.1 (6'-C), 32.4 (5-C), 20.8, 20.7, 20.6 (CH<sub>3</sub>) (one aromatic peak overlapped or missing); *m/z*



(ES) 1007.3 (54%,  $MNa^+$ ), 1006.3 (100) and 429.7 (87); (Found:  $MNa^+$ , 1007.3596.

$C_{45}H_{52}O_{14}N_{12}$  requires  $MNa$ , 1007.3624).

**(1*R*,2*S*,3*S*,4*R*,6*S*)-1-*O*-(6'-Azido-6'-deoxy-2',3',4'-tri-*O*-benzyl- $\alpha$ -L-glucopyranosyl)-3-*O*-(3''-Azido-3''-deoxy-2'',4'',6''-tri-*O*-benzyl- $\alpha$ -D-glucopyranosyl)-4,6-diazido-cyclohexan-1,2,3-ol 27A'C**

By method A, the glycosyl donor **21C** (82 mg, 1.2 eq., 0.15 mmol) and the acceptor **31A'** (81 mg, 1.0 eq., 0.12 mmol) gave a crude product which was purified by flash chromatography on silica gel (gradient elution 9:1 to 8:2 petrol–EtOAc) and preparative HPLC to give **27A'C** (55 mg, 40%) as a colourless foam,  $R_f$  0.60 (7:3 petrol–EtOAc);  $[\alpha]_D^{+12.2}$  (c. 0.92 in  $CHCl_3$ );  $\nu_{max}/cm^{-1}$  (film) 3475, 2920, 2107 and 1071;  $\delta_H$  (500 MHz,  $CDCl_3$ ) 7.45–7.11 (30H, m, Ph), 5.27 (1H, d,  $J$  3.6, 1'-H), 5.10 (1H, d,  $J$  3.5, 1''-H), 4.94 (1H, d,  $J$  10.9,  $CH_A$ HPh), 4.83 (1H, d,  $J$  11.2,  $CH_B$ HPh), 4.81–4.70 (6H, m,  $CH_2$ Ph), 4.53 (1H, d,  $J$  10.9,  $CH_C$ HPh), 4.51 (1H, d,  $J$  12.5,  $CH_D$ HPh), 4.43 (1H, d,  $J$  12.5,  $CH_H$  $_D$ ·Ph), 4.39 (1H, d,  $J$  10.7,  $CH_E$ HPh), 4.34–4.29 (1H, m, 5'-H), 4.16 (1H, d,  $J$  3.1, OH), 4.14–4.09 (1H, m, 5''-H), 3.96 (1H, t,  $J$  9.3, 3'-H), 3.90 (1H, dd,  $J$  10.0 and 9.9, 3''-H), 3.56 (1H, dd,  $J$  9.8 and 3.7, 2'-H), 3.54–3.49 (4H, m, 2-H, 6-H, and 6''-H), 3.49–3.41 (3H, m, 4-H, 4'-H and 6'-H), 3.41–3.35 (2H, m, 1-H and 2''-H), 3.31 (1H, dd,  $J$  9.9 and 9.8, 4''-H), 3.30 (1H, dd,  $J$  9.8 and 9.3, 3-H), 3.27 (1H, dd,  $J$  13.7 and 4.8, 6'-H), 2.34–2.28 (1H, m, 5-H<sub>A</sub>) and 1.51 (1H, q,  $J$  12.8, 5-H<sub>B</sub>);  $\delta_C$  (125 MHz,  $CDCl_3$ ) 138.6, 137.9, 137.8, 137.6, 137.5, 137.4 (*o*-Ph), 128.6, 128.5, 128.4, 128.3, 128.2, 128.1, 128.0, 127.9, 127.8, 127.6 (Ph), 97.4, 97.3 (1''-C and 1'-C), 84.8 (3-C), 81.6, 81.5 (3'-C and 1-C), 79.7 (2'-C), 78.2 (4'-C), 77.6 (2''-C), 76.3 (4''-C), 75.6 ( $CH_2$ Ph), 75.2 ( $CH_2$ Ph), 74.9 ( $CH_2$ Ph), 73.4 (2-C), 73.4 ( $CH_2$ Ph), 73.3 ( $CH_2$ Ph), 73.1 ( $CH_2$ Ph), 70.8 (5''-C), 70.4 (5'-C), 67.9 (6''-C), 65.2 (3''-C), 59.9 (6-C), 59.7 (4-C), 51.4 (6'-C), 32.2 (5-C) (eight aromatic peaks overlapped or missing);  $m/z$  (ES) 1151.8 (55%,  $MNa^+$ ), 496.3 (65), 430.3 (100) and 401.0 (70); (Found:  $MNa^+$ , 1151.4756.  $C_{60}H_{64}O_{11}N_{12}$  requires  $MNa$ , 1151.4715).

Also obtained was (1*R*,2*S*,3*S*,4*R*,6*S*)-1-*O*-(6'-Azido-6'-deoxy-2',3',4'-tri-*O*-benzyl- $\alpha$ -L-glucopyranosyl)-3-*O*-(3''-Azido-3''-deoxy-2'',4'',6''-tri-*O*-benzyl- $\beta$ -D-glucopyranosyl)-

4,6-diazido-cyclohexan-1,2,3-ol **27A'd** (17 mg, 12%) as a colourless foam,  $R_f$  0.60 (7:3 petrol–EtOAc);  $[\alpha]_D -16.7$  (c. 1.03 in  $\text{CHCl}_3$ );  $\nu_{\text{max}}/\text{cm}^{-1}$  (film) 3468, 2919, 2105, 1261 and 1070;  $\delta_{\text{H}}$  (500 MHz,  $\text{CDCl}_3$ ) 7.39-7.18 (30H, m, Ph), 5.18 (1H, d,  $J$  3.6, 1'-H), 4.99 (1H, d,  $J$  10.9,  $\text{CH}_A\text{HPh}$ ), 4.92 (1H, d,  $J$  10.8,  $\text{CH}_B\text{HPh}$ ), 4.85 (1H, d,  $J$  10.9,  $\text{CH}_C\text{HPh}$ ), 4.84 (1H, d,  $J$  10.9,  $\text{CHH}_A\text{-Ph}$ ), 4.82-4.76 (4H, m,  $\text{CH}_2\text{Ph}$ ), 4.77 (1H, d,  $J$  5.3, 1''-H), 4.72 (1H, d,  $J$  11.6,  $\text{CH}_D\text{HPh}$ ), 4.67 (1H, d,  $J$  12.2,  $\text{CH}_E\text{HPh}$ ), 4.58 (1H, d,  $J$  12.2,  $\text{CHH}_E\text{-Ph}$ ), 4.57 (1H, d,  $J$  10.8,  $\text{CHH}_B\text{-Ph}$ ), 4.10-4.05 (1H, m, 5'-H), 3.93 (1H, t,  $J$  9.4, 3'-H), 3.77-3.72 (2H, m, 6''-H), 3.69 (1H, d,  $J$  2.5, OH), 3.60-3.42 (8H, m, 2-H, 3-H, 6-H, 2'-H, 4'-H, 3''-H, 4''-H and 5''-H), 3.36 (1H, dd,  $J$  13.1 and 2.4, 6'-H), 3.34-3.28 (3H, m, 1-H, 4-H and 2''-H), 3.22 (1H, dd,  $J$  13.1 and 4.4, 6'-H), 2.28-2.22 (1H, m, 5- $\text{H}_A$ ) and 1.45-1.35 (1H, m, 5- $\text{H}_B$ );  $\delta_{\text{C}}$  (125 MHz,  $\text{CDCl}_3$ ) 138.3, 137.8 (*o*-Ph), 128.6, 128.5, 128.4, 128.3, 128.2, 128.1, 128.0, 127.9, 127.7 (Ph), 103.5 (1''-C), 97.7 (1'-C), 83.7 (3-C), 81.9 (2''-C), 81.5 (3'-C), 80.3 (1-C), 79.7 (2'-C), 78.1 (4'-C), 75.9 (2-C), 75.7 ( $\text{CH}_2\text{Ph}$ ), 75.3 (4''-C), 74.9 ( $\text{CH}_2\text{Ph}$ ), 73.6 ( $\text{CH}_2\text{Ph}$ ), 73.4 ( $\text{CH}_2\text{Ph}$ ), 70.4 (5'-C), 68.8 (3''-C), 68.6 (6''-C), 60.1 (6-C), 58.2 (4-C), 51.1 (6'-C) and 32.3 (5-C) (sixteen peaks overlapped or missing);  $m/z$  (ES) 1151.7 (30%,  $\text{MNa}^+$ ), 1101.7 (32) and 430.3 (100); (Found:  $\text{MNa}^+$ , 1151.4681.  $\text{C}_{60}\text{H}_{64}\text{O}_{11}\text{N}_{12}$  requires *MNa*, 1151.4715).

**(1R,2S,3S,4R,6S)-1-O-(6'-Azido-6'-deoxy-2',3',4'-tri-O-benzyl- $\alpha$ -L-glucopyranosyl)-3-O-(3''-Azido-3''-deoxy-2'',4'',6''-tri-O-acetoxy- $\beta$ -D-glucopyranosyl)-4,6-diazido-cyclohexan-1,2,3-ol **27A'D****

By method A, the glycosyl donor **21D** (61 mg, 1.2 eq., 0.15 mmol) and the acceptor **31A'** (81 mg, 1.0 eq., 0.12 mmol) gave a crude product which was purified by flash chromatography on silica gel (gradient elution 7:3 to 6:4 petrol–EtOAc) and preparative HPLC to give **27A'D** (44 mg, 37%) as a colourless foam,  $R_f$  0.25 (7:3 petrol–EtOAc);  $[\alpha]_D -23.6$  (c. 1.00 in  $\text{CHCl}_3$ );  $\nu_{\text{max}}/\text{cm}^{-1}$  (film) 3486, 2916, 2106, 1751, 1222 and 1069;  $\delta_{\text{H}}$  (500 MHz,  $\text{CDCl}_3$ ) 7.41-7.24 (15H, m, Ph), 5.05 (1H, d,  $J$  3.8, 1'-H), 5.04 (1H, dd,  $J$  9.9 and 9.6, 4''-H), 4.98 (1H, d,  $J$  7.9, 1''-H), 4.97 (1H, d,  $J$  10.9,  $\text{CH}_A\text{HPh}$ ), 4.91 (1H, dd,  $J$  10.1 and 7.9, 2''-H), 4.90 (1H, d,  $J$  11.0,  $\text{CH}_B\text{HPh}$ ), 4.79 (1H, d,  $J$  10.9,  $\text{CHH}_A\text{-Ph}$ ), 4.76 (1H, d,  $J$  11.8,  $\text{CH}_C\text{HPh}$ ), 4.73 (1H, d,  $J$  11.8,  $\text{CHH}_C\text{-Ph}$ ), 4.56 (1H, d,  $J$  11.0,  $\text{CHH}_B\text{-Ph}$ ), 4.23-4.20 (2H, m,

6''-H), 4.05-4.01 (1H, m, 5'-H), 4.00 (1H, t,  $J$  9.3, 3'-H), 3.83 (1H, d,  $J$  2.5, OH), 3.68-3.64 (1H, m, 5''-H), 3.63 (1H, t,  $J$  10.1, 3''-H), 3.57 (1H, dd,  $J$  9.3 and 3.8, 2'-H), 3.55 (1H, dd,  $J$  9.3 and 9.1, 3-H), 3.53-3.38 (3H, m, 2-H, 6-H and 6'-H), 3.41 (1H, dd,  $J$  9.7 and 9.3, 4'-H), 3.38-3.34 (1H, m, 4-H), 3.31 (1H, dd,  $J$  13.0 and 6.7, 6'-H), 3.24 (1H, t,  $J$  9.2, 1-H), 2.20 (1H, dt,  $J$  13.5 and 4.5, 5-H<sub>A</sub>), 2.12 (6H, s, CH<sub>3</sub>), 2.08 (3H, s, CH<sub>3</sub>) and 1.37-1.27 (1H, m, 5-H<sub>B</sub>);  $\delta_C$  (125 MHz, CDCl<sub>3</sub>) 170.8, 169.2, 169.2 (C=O), 138.4, 137.8, 137.6 (*o*-Ph), 128.6, 128.5, 128.4, 128.1, 128.0, 127.9, 127.8 (Ph), 100.8 (1''-C), 98.4 (1'-C), 85.6 (1-C), 81.6 (3-C), 81.0 (3'-C), 79.7 (2'-C), 78.1 (4'-C), 75.7 (*C*<sub>A</sub>H<sub>2</sub>Ph), 75.3 (*C*<sub>B</sub>H<sub>2</sub>Ph), 75.0 (2-C), 73.6 (*C*<sub>C</sub>H<sub>2</sub>Ph), 72.5 (5''-C), 71.6 (2''-C), 71.2 (5'-C), 68.4 (4''-C), 64.3 (3''-C), 61.8 (6''-C), 59.4 (6-C), 58.3 (4-C), 51.8 (6'-C), 32.5 (5-C), 20.7, 20.7 and 20.6 (CH<sub>3</sub>) (two aromatic peaks overlapped or missing);  $m/z$  (ES) 1007.5 (60%, MNa<sup>+</sup>), and 430.3 (100); (Found: MNa<sup>+</sup>, 1007.3625). C<sub>45</sub>H<sub>52</sub>O<sub>14</sub>N<sub>12</sub> requires *MNa*, 1007.3624).

**(1*R*,2*S*,3*S*,4*R*,6*S*)-1-*O*-(6'-Azido-6'-deoxy-2',3',4'-tri-*O*-benzyl- $\alpha$ -D-glucopyranosyl)-3-*O*-(2''-Azido-2''-deoxy-3'',4'',6''-tri-*O*-benzyl- $\alpha$ -D-glucopyranosyl)-4,6-diazido-cyclohexan-1,2,3-ol 27AE**

By method A, the glycosyl donor **21E** (79 mg, 1.2 eq., 0.14 mmol) and the acceptor **31A** (78 mg, 1.0 eq., 0.12 mmol) gave a crude product which was purified by flash chromatography on silica gel (gradient elution: 8:2  $\rightarrow$  7:3 petrol–EtOAc) and preparative HPLC to give **27AE** (31 mg, 24%) as a colourless foam,  $R_f$  0.50 (7:3 petrol–EtOAc);  $[\alpha]_D$  +64.2 (c. 0.99 in CHCl<sub>3</sub>);  $\nu_{\max}/\text{cm}^{-1}$  (film) 3459, 2923, 2106, 1154 and 1069;  $\delta_H$  (500 MHz, CDCl<sub>3</sub>) 7.40-7.00 (30H, m, Ph), 5.33 (1H, d,  $J$  3.7, 1''-H), 5.07 (1H, d,  $J$  3.5, 1'-H), 4.92-4.87 (4H, m, CH<sub>2</sub>Ph), 4.86 (1H, d,  $J$  11.0, CH<sub>A</sub>HPh), 4.83 (1H, d,  $J$  10.8, CH<sub>B</sub>HPh), 4.73 (1H, d,  $J$  11.6, CH<sub>C</sub>HPh), 4.68 (1H, d,  $J$  11.6, CHH<sub>C</sub>Ph), 4.61 (1H, d,  $J$  11.0, CHH<sub>A</sub>Ph), 4.57 (1H, d,  $J$  12.1, CH<sub>D</sub>HPh), 4.52 (1H, d,  $J$  10.8, CHH<sub>B</sub>Ph), 4.40 (1H, d,  $J$  12.1, CHH<sub>D</sub>Ph), 4.35 (1H, d,  $J$  1.6, OH), 4.33-4.28 (1H, m, 5''-H), 4.11-4.05 (1H, m, 5'-H), 3.99 (1H, t,  $J$  9.4, 3'-H), 3.96 (1H, dd,  $J$  10.0 and 9.3, 3''-H), 3.75 (1H, dd,  $J$  9.7 and 9.3, 4''-H), 3.65 (1H, dd,  $J$  10.7 and 3.0, 6''-H), 3.59-3.50 (6H, m, 2'-H, 4'-H, 6'-H, 6''-H, 2-H and 4-H), 3.46-3.36 (3H, m, 2''-H, 6'-H and 1-H), 3.30-3.25 (1H, m, 6-H), 3.22 (1H, m, 3-H), 2.38 (1H, dt,  $J$  13.1 and 4.3, 5-H<sub>A</sub>)

and 1.67-1.50 (1H, m, 5-H<sub>B</sub>);  $\delta_C$  (125 MHz, CDCl<sub>3</sub>) 138.4, 138.1, 138.0, 137.9, 137.8, 137.0 (*o*-Ph), 128.7, 128.6, 128.5, 128.4, 128.3, 128.1, 128.0, 127.9, 127.8, 127.7 (Ph), 100.4 (1''-C), 98.7 (1'-C), 84.9 (3-C), 81.9 (3'-C), 80.8 (1-C), 80.3 (3''-C), 79.7 (2'-C), 78.2, 78.1 (4'-C and 4''-C), 75.6 (CH<sub>2</sub>Ph), 75.5 (CH<sub>2</sub>Ph), 75.3 (CH<sub>2</sub>Ph), 75.2 (CH<sub>2</sub>Ph), 74.4, 74.3 (CH<sub>2</sub>Ph and 2-C), 73.5 (CH<sub>2</sub>Ph), 71.0, 70.9 (5'-C and 5''-C), 68.1 (6''-C), 63.6 (2''-C), 60.9 (4-C), 58.8 (6-C), 51.2 (6'-C) and 32.5 (5-C) (eight aromatic peaks overlapped or missing); *m/z* (ES) 1151.8 (100%, MNa<sup>+</sup>), and 430.3 (89); (Found: MNa<sup>+</sup>, 1151.4741. C<sub>60</sub>H<sub>64</sub>O<sub>11</sub>N<sub>12</sub> requires *MNa*, 1151.4715).

Also obtained was (1*R*,2*S*,3*S*,4*R*,6*S*)-1-*O*-(6'-Azido-6'-deoxy-2',3',4'-tri-*O*-benzyl- $\alpha$ -D-glucopyranosyl)-3-*O*-(2''-Azido-2''-deoxy-3'',4'',6''-tri-*O*-benzyl- $\beta$ -D-glucopyranosyl)-4,6-diazido-cyclohexan-1,2,3-ol **27Af** (32 mg, 24%) as a colourless foam, *R<sub>f</sub>* 0.50 (7:3 petrol-EtOAc);  $[\alpha]_D^{+57.6}$  (c. 1.00 in CHCl<sub>3</sub>);  $\nu_{\max}/\text{cm}^{-1}$  (film) 3435, 2919, 2107 and 1069;  $\delta_H$  (500 MHz, CDCl<sub>3</sub>) 7.42-7.14 (30H, m, Ph), 5.07 (1H, d, *J* 3.5, 1'-H), 4.96 (1H, d, *J* 11.0, CH<sub>A</sub>HPh), 4.93-4.89 (3H, m, CHH<sub>A</sub>Ph, CH<sub>B</sub>HPh and CH<sub>C</sub>HPh), 4.88 (1H, d, *J* 11.4, CH<sub>D</sub>HPh), 4.86 (1H, d, *J* 11.2, CHH<sub>B</sub>Ph), 4.81 (1H, d, *J* 11.8, CH<sub>E</sub>HPh), 5.11 (1H, d, *J* 4.0, 1''-H), 4.72 (1H, d, *J* 11.4, CHH<sub>D</sub>Ph), 4.68 (1H, d, *J* 12.2, CH<sub>F</sub>HPh), 4.64-4.59 (2H, m, CHH<sub>C</sub>Ph and CHH<sub>E</sub>Ph), 4.60 (1H, d, *J* 12.2, CHH<sub>F</sub>Ph), 4.10 (1H, br d, *J* 9.6, 5'-H), 4.03 (1H, t, *J* 9.3, 3'-H), 3.81-3.78 (1H, m, 6''-H<sub>A</sub>), 3.75 (1H, dd, *J* 11.3 and 4.5, 6''-H<sub>B</sub>), 3.71-3.63 (3H, m, 3''-H, 2-H and 3-H), 3.60 (1H, dd, *J* 9.3 and 3.5, 2'-H), 3.58-3.52 (2H, m, 4'-H and 6'-H), 3.50-3.36 (5H, m, 2''-H, 4''-H, 5''-H, 6'-H and 4-H), 3.30-3.22 (1H, m, 6-H), 3.20-3.14 (1H, m, 1-H), 2.29-2.22 (1H, m, 5-H<sub>A</sub>) and 1.38 (1H, q, *J* 12.8, 5-H<sub>B</sub>);  $\delta_C$  (125 MHz, CDCl<sub>3</sub>) 138.5, 138.3, 138.0, 137.9, 137.8, 136.9 (*o*-Ph), 128.7, 128.6, 128.5, 128.4, 128.0, 127.9, 127.8, 127.7, 127.6, 127.5 (Ph), 101.5 (1''-C), 100.5 (1'-C), 84.6 (1-C), 83.1 (4''-C), 82.0 (3'-C), 80.7 (3-C), 79.8 (2'-C), 78.3 (4'-C), 77.9 (3''-C), 76.3 (2-C), 75.6 (5''-C), 75.5 (CH<sub>2</sub>Ph), 75.4 (CH<sub>2</sub>Ph), 75.3 (CH<sub>2</sub>Ph), 75.1 (CH<sub>2</sub>Ph), 74.7 (CH<sub>2</sub>Ph), 73.5 (CH<sub>2</sub>Ph), 70.9 (5'-C), 68.8 (6''-C), 66.0 (2''-C), 58.9 (6-C), 58.3 (4-C), 51.2 (6'-C) and 32.3 (5-C) (eight aromatic peaks overlapped or missing); *m/z* (ES) 1151.9 (100%, MNa<sup>+</sup>) and 430.4 (89); (Found: MNa<sup>+</sup>, 1151.4698. C<sub>60</sub>H<sub>64</sub>O<sub>11</sub>N<sub>12</sub> requires *MNa*, 1151.4715).

**(1R,2S,3S,4R,6S)-1-O-(6'-Azido-6'-deoxy-2',3',4'-tri-O-benzyl- $\alpha$ -D-glucopyranosyl)-3-O-(2''-Phthalimido-2''-deoxy-3'',4'',6''-tri-O-benzyl- $\beta$ -D-glucopyranosyl)-4,6-diazidocyclohexan-1,2,3-ol 27AF**

By method A, the glycosyl donor **21F** (72 mg, 1.2 eq., 0.11 mmol) and the acceptor **31A** (60 mg, 1.0 eq., 0.09 mmol) gave a crude product which was purified by flash chromatography on silica gel (7:3 petrol–EtOAc) and preparative HPLC to give **27AF** (56 mg, 51%) as a colourless foam,  $R_f$  0.50 (7:3 petrol–EtOAc);  $[\alpha]_D^{+63.8}$  (c. 1.01 in  $\text{CHCl}_3$ );  $\nu_{\text{max}}/\text{cm}^{-1}$  (film) 3432, 2926, 2105, 1715, 1388 and 1070;  $\delta_{\text{H}}$  (500 MHz,  $\text{CDCl}_3$ ) 7.42–7.17 (30H, m, Ph), 6.98 (2H, d,  $J$  7.1, 2- $\text{H}_{\text{Phth}}$ ), 6.98 (2H, t,  $J$  7.1, 3- $\text{H}_{\text{Phth}}$ ), 5.51 (1H, d,  $J$  8.5, 1''-H), 4.84 (1H, d,  $J$  3.8, 1'-H), 4.79 (1H, d,  $J$  11.7,  $\text{CH}_B\text{HPh}$ ), 4.72 (1H, d,  $J$  10.9,  $\text{CH}_C\text{HPh}$ ), 4.69 (1H, d,  $J$  12.2,  $\text{CH}_D\text{HPh}$ ), 4.68 (1H, d,  $J$  11.8,  $\text{CHH}_A\text{Ph}$ ), 4.65–4.63 (3H, m), 4.59 (1H, d,  $J$  12.2,  $\text{CHH}_D\text{Ph}$ ), 4.56 (1H, d,  $J$  12.1,  $\text{CH}_E\text{HPh}$ ), 4.54 (1H, d,  $J$  10.9,  $\text{CHH}_C\text{Ph}$ ), 4.47 (1H, t,  $J$  10.5, 3''-H), 4.45 (1H, d,  $J$  11.7,  $\text{CHH}_B\text{Ph}$ ), 4.40 (1H, d,  $J$  12.1,  $\text{CHH}_E\text{Ph}$ ), 4.27 (1H, dd,  $J$  10.5 and 8.5, 2''-H), 4.05 (1H, d,  $J$  1.1, OH), 3.95 (1H, ddd,  $J$  9.6, 4.0 and 2.8, 5'-H), 3.88–3.80 (3H, m, 4''-H and 6''-H), 3.77 (1H, t,  $J$  9.4, 3'-H), 3.75–3.70 (1H, m, 5''-H), 3.53 (1H, t,  $J$  9.5, 3-H), 3.49 (1H, dd,  $J$  13.4 and 2.8, 6'-H), 3.43 (1H, dd,  $J$  9.6 and 9.4, 4'-H), 3.39 (1H, dd,  $J$  9.4 and 3.8, 2'-H), 3.35 (1H, dd,  $J$  13.4 and 4.0, 6'-H), 3.33–3.23 (2H, m, 2-H and 4-H), 3.15 (1H, m, 6-H), 3.04 (1H, dd,  $J$  9.6 and 9.4, 1-H), 2.24–2.16 (1H, m, 5- $\text{H}_A$ ) and 1.38–1.28 (1H, m, 5- $\text{H}_B$ );  $\delta_{\text{C}}$  (125 MHz,  $\text{CDCl}_3$ ) 166.6 (C=O), 138.5, 138.4, 138.1, 138.0, 137.9 (*o*-Ph), 133.4, 131.9 (*o*-Phth), 128.8, 128.7, 128.6, 128.5, 128.4, 128.0, 127.9, 127.8, 127.7, 127.6, 127.3 (Ph), 100.1 (1'-C), 98.6 (1''-C), 84.1 (1-C), 81.7 (3'-C and 3-C), 79.6 (4''-C), 79.2 (3''-C), 78.6 (2'-C), 78.0 (4'-C), 75.5 (2-C), 75.4 (5''-C), 75.2 ( $\text{CH}_2\text{Ph}$ ), 75.1 ( $\text{CH}_2\text{Ph}$ ), 75.0 ( $\text{CH}_2\text{Ph}$ ), 74.8 ( $\text{CH}_2\text{Ph}$ ), 73.5 ( $\text{CH}_2\text{Ph}$ ), 70.8 (5'-C), 68.9 (6''-C), 59.2 (6-C), 58.4 (4-C), 55.9 (2''-C), 51.1 (6'-C) and 32.4 (5-C) (ten peaks overlapped or missing);  $m/z$  (ES) 1256.0 (40%,  $\text{MNa}^+$ ), 454.4 (25) and 348.3 (100); (Found:  $\text{MNa}^+$ , 1255.4885.  $\text{C}_{64}\text{H}_{68}\text{O}_{13}\text{N}_{10}$  requires  $\text{MNa}$ , 1255.4865).

**(1*R*,2*S*,3*S*,4*R*,6*S*)-1-*O*-(6'-Azido-6'-deoxy-2',3',4'-tri-*O*-benzyl- $\alpha$ -L-glucopyranosyl)-3-*O*-(2''-Azido-2''-deoxy-3'',4'',6''-tri-*O*-benzyl- $\alpha$ -D-glucopyranosyl)-4,6-diazido-cyclohexan-1,2,3-ol 27A'E**

By method A, the glycosyl donor **21E** (82 mg, 1.2 eq., 0.14 mmol) and the acceptor **31A'** (81 mg, 1.0 eq., 0.12 mmol) gave a crude product which was purified by flash chromatography on silica gel (8:2 petrol–EtOAc) and preparative HPLC to give **27A'E** (25 mg, 19%; >90:10 mixture of diastereomers) as a colourless foam,  $R_f$  0.57 (7:3 petrol–EtOAc);  $\nu_{\max}/\text{cm}^{-1}$  (film) 3473, 2920, 2106 and 1070;  $\delta_{\text{H}}$  (500 MHz,  $\text{CDCl}_3$ ) 7.48-7.07 (30H, m, Ph), 5.24 (1H, d,  $J$  4.3, 1'-H), 5.22 (1H, d,  $J$  4.6, 1''-H), 4.96 (1H, d,  $J$  11.0,  $\text{CH}_A\text{HPh}$ ), 4.88 (1H, d,  $J$  10.6,  $\text{CH}_B\text{HPh}$ ), 4.85 (1H, d,  $J$  10.9,  $\text{CH}_C\text{HPh}$ ), 4.84 (1H, d,  $J$  10.6,  $\text{CH}_H\text{B}\cdot\text{Ph}$ ), 4.79 (1H, d,  $J$  11.6,  $\text{CH}_D\text{HPh}$ ), 4.77 (1H, d,  $J$  10.9,  $\text{CH}_E\text{HPh}$ ), 4.75-4.71 (2H, m,  $\text{CH}_H\text{A}\cdot\text{Ph}$  and  $\text{CH}_H\text{D}\cdot\text{Ph}$ ), 4.54 (1H, d,  $J$  10.9,  $\text{CH}_H\text{C}\cdot\text{Ph}$ ), 4.52 (1H, d,  $J$  12.5, 6''- $\text{CCH}_F\text{HPh}$ ), 4.46 (1H, d,  $J$  10.8,  $\text{CH}_H\text{E}\cdot\text{Ph}$ ), 4.44 (1H, d,  $J$  12.5, 6''- $\text{CCH}_H\text{F}\cdot\text{Ph}$ ), 4.28 (1H, ddd,  $J$  9.9, 4.9 and 2.3, 5'-H), 4.19 (1H, ddd,  $J$  9.9, 3.4 and 3.0, 5''-H), 4.10 (1H, d,  $J$  3.3, OH), 3.98 (1H, t,  $J$  9.4, 3'-H), 3.96 (1H, dd,  $J$  9.9 and 9.4, 3''-H), 3.63-3.53 (5H, m, 6-H, 2'-H, 4''-H and 6''-H), 3.53-3.49 (3H, m, 2-H, 6'- $\text{H}_A$  and 2''-H), 3.49-3.40 (2H, m, 4-H and 4'-H), 3.35 (1H, t,  $J$  9.4, 1-H), 3.34 (1H, dd,  $J$  9.5 and 9.1, 3-H), 3.29 (1H, dd,  $J$  13.0 and 5.0, 6'- $\text{H}_B$ ), 2.36-2.30 (1H, m, 5- $\text{H}_A$ ) and 1.52 (1H, q,  $J$  12.8, 5- $\text{H}_B$ );  $\delta_{\text{C}}$  (125 MHz,  $\text{CDCl}_3$ ) 138.6, 137.9, 137.8, 137.7 (*o*-Ph), 128.7, 128.5, 128.4, 128.1, 128.0, 127.9, 127.8 (Ph), 98.8 (1''-C), 97.5 (1'-C), 84.2 (3-C), 82.5 (1-C), 81.5 (3'-C), 80.4 (3''-C), 79.7 (2'-C), 78.3 (4''-C), 78.2 (4'-C), 75.7 ( $\text{CH}_2\text{Ph}$ ), 75.6 ( $\text{CH}_2\text{Ph}$ ), 75.2 ( $\text{CH}_2\text{Ph}$ ), 75.1 ( $\text{CH}_2\text{Ph}$ ), 73.5, 73.4, 73.3 ( $\text{CH}_2\text{Ph}$  and 2-C), 71.4 (5''-C), 70.6 (5'-C), 67.9 (6''-C), 63.9 (2''-C), 60.3-59.8 (4-C and 6-C), 51.4 (6'-C) and 32.4 (5-C) (13 aromatic peaks overlapped or missing);  $m/z$  (ES) 1151.7 (80%,  $\text{MNa}^+$ ), 609.4 (54) and 430.3 (100); (Found:  $\text{MNa}^+$ , 1151.4666.  $\text{C}_{60}\text{H}_{64}\text{O}_{11}\text{N}_{12}$  requires  $\text{MNa}$ , 1151.4715).

Also obtained was (1*R*,2*S*,3*S*,4*R*,6*S*)-1-*O*-(6'-Azido-6'-deoxy-2',3',4'-tri-*O*-benzyl- $\alpha$ -L-glucopyranosyl)-3-*O*-(2''-Azido-2''-deoxy-3'',4'',6''-tri-*O*-benzyl- $\beta$ -D-glucopyranosyl)-4,6-diazido-cyclohexan-1,2,3-ol **27A'f** (36 mg, 26%; >85:15 mixture of diastereomers) as a colourless foam,  $R_f$  0.57 (7:3 petrol–EtOAc);  $\nu_{\max}/\text{cm}^{-1}$  (film) 3480, 2918, 2108 and 1070;  $\delta_{\text{H}}$  (500 MHz,  $\text{CDCl}_3$ ) 7.41-7.15 (30H, m, Ph), 5.12 (1H, d,  $J$  3.5, 1'-H), 4.98 (1H, d,  $J$  10.9,

$CH_AHPh$ ), 4.90 (1H, d,  $J$  10.9,  $CH_BHPh$ ), 4.87 (1H, d,  $J$  10.7,  $CH_CHPh$ ), 4.83-4.74 (5H, m,  $CH_2Ph$ ), 4.78 (1H, d,  $J$  5.1, 1''-H), 4.66 (1H, d,  $J$  12.2,  $CH_DHPh$ ), 4.63-4.54 (3H, m,  $CH_2Ph$ ), 4.18-4.12 (1H, m, 5'-H), 4.05-3.98 (1H, m, 3'-H), 4.04 (1H, d,  $J$  2.7, OH), 3.80-3.75 (1H, m, 6''-H<sub>A</sub>), 3.73 (1H, dd,  $J$  11.2 and 4.5, 6''-H<sub>B</sub>), 3.68-3.55 (5H, m, 2-H, 3-H, 2'-H, 6'-H<sub>A</sub> and 4''-H), 3.50-3.43 (5H, m, 6-H, 4'-H, 2''-H, 3''-H and 5''-H), 3.43-3.33 (2H, m, 4-H and 6'-H<sub>B</sub>), 3.30 (1H, dd,  $J$  9.2 and 9.0, 1-H), 2.26-2.18 (1H, m, 5-H<sub>A</sub>) and 1.34 (1H, q,  $J$  12.9, 5-H<sub>B</sub>);  $\delta_C$  (125 MHz, CDCl<sub>3</sub>) 138.6, 138.5, 137.9, 137.8, 137.7 (*o*-Ph), 128.6, 128.5, 128.4, 128.1, 128.0, 127.9, 127.8, 127.7, 127.5 (Ph), 101.9 (1''-C), 97.8 (1'-C), 84.3 (1-C), 83.2 (3''-C), 82.2 (3-C), 81.3 (3'-C), 79.7 (2'-C), 78.1 (4'-C), 77.9 (4''-C), 75.7 ( $CH_2Ph$ ), 75.6 ( $CH_2Ph$ ), 75.4 (5''-C), 75.2 (2-C), 75.0 ( $CH_2Ph$ ), 73.5 ( $CH_2Ph$ ), 70.9 (5'-C), 68.8 (6''-C), 66.1 (2''-C), 59.7 (6-C), 58.3 (4-C), 51.5 (6'-C) and 32.4 (5-C) (twelve peaks overlapped or missing);  $m/z$  (ES) 1151.7 (88%, MNa<sup>+</sup>) and 430.3 (100); (Found: MNa<sup>+</sup>, 1151.4746. C<sub>60</sub>H<sub>64</sub>O<sub>11</sub>N<sub>12</sub> requires MNa, 1151.4715).

**(1*R*,2*S*,3*S*,4*R*,6*S*)-1-*O*-(6'-Azido-6'-deoxy-2',3',4'-tri-*O*-benzyl- $\alpha$ -L-glucopyranosyl)-3-*O*-(2''-Phthalimido-2''-deoxy-3'',4'',6''-tri-*O*-benzyl- $\beta$ -D-glucopyranosyl)-4,6-diazido-cyclohexan-1,2,3-ol 27A'F**

By method A, the glycosyl donor **21F** (97 mg, 1.2 eq., 0.15 mmol) and the acceptor **31A'** (81 mg, 1.0 eq., 0.14 mmol) gave a crude product which was purified by flash chromatography on silica gel (7:3 petrol–EtOAc) and preparative HPLC to give **27A'F** (62 mg, 42%) as a colourless foam,  $R_f$  0.41 (7:3 petrol/EtOAc);  $[\alpha]_D -2.0$  (c. 0.92 in CHCl<sub>3</sub>);  $\nu_{max}/cm^{-1}$  (film) 3477, 2923, 2106, 1715 and 1071;  $\delta_H$  (500 MHz, CDCl<sub>3</sub>) 7.38-7.14 (30H, m, Ph), 6.99-6.80 (4H, m, H<sub>Phth</sub>), 5.49 (1H, d,  $J$  8.5, 1''-H), 5.00 (1H, d,  $J$  3.5, 1'-H), 4.90 (1H, d,  $J$  11.0,  $CH_AHPh$ ), 4.84 (1H, d,  $J$  10.9,  $CH_BHPh$ ), 4.82 (1H, d,  $J$  11.8,  $CH_CHPh$ ), 4.78 (1H, d,  $J$  12.1,  $CH_DHPh$ ), 4.71 (1H, d,  $J$  11.0,  $CHH_APh$ ), 4.67 (1H, d,  $J$  12.1, 6''-CCH<sub>E</sub>HPh), 4.66 (1H, d,  $J$  11.8,  $CH_FHPh$ ), 4.64 (1H, d,  $J$  11.8,  $CHH_CPh$ ), 4.62 (1H, d,  $J$  11.8,  $CHH_FPh$ ), 4.60 (1H, d,  $J$  12.1, 6''-CCH<sub>H\_E</sub>Ph), 4.51 (1H, d,  $J$  10.9,  $CHH_BPh$ ), 4.42 (1H, d,  $J$  12.1,  $CHH_DPh$ ), 4.37 (1H, dd,  $J$  10.6 and 8.7, 3''-H), 4.24 (1H, dd,  $J$  10.6 and 8.5, 2''-H), 3.93-3.88 (1H, m, 5'-H), 3.87 (1H, dd,  $J$  9.5 and 9.3, 3'-H), 3.83-3.73 (3H, m, 4''-H and 6''-H), 3.71-3.66 (1H, m, 5''-H),

3.52-3.45 (3H, m, 3-H, 2'-H and OH), 3.42 (1H, dd,  $J$  9.5 and 9.4, 4'-H), 3.37-3.30 (1H, m, 6-H), 3.30-3.21 (2H, m, 2-H and 4-H), 3.19 (1H, t,  $J$  9.4, 1-H), 3.09 (1H, dd,  $J$  13.3 and 4.1, 6'-H<sub>A</sub>), 2.99 (1H, dd,  $J$  13.3 and 2.2, 6'-H<sub>B</sub>), 2.18-2.11 (1H, m, 5-H<sub>A</sub>) and 1.34-1.25 (1H, m, 5-H<sub>B</sub>);  $\delta_C$  (125 MHz, CDCl<sub>3</sub>) 138.1, 137.9, 137.5, 137.4, 137.2 (*o*-Ph), 128.6, 127.9, 127.8, 127.7, 127.5, 127.4, 127.3, 127.2, 127.0, 129.8 (Ph), 97.6 (1''-C), 97.1 (1'-C), 83.1 (1-C), 81.3 (3-C), 80.7 (3'-C), 79.2 (4''-C), 78.9 (2'-C), 78.2 (3''-C), 77.2 (4'-C), 75.1 (CH<sub>2</sub>Ph), 74.7 (5''-C), 74.6 (CH<sub>2</sub>Ph), 74.5 (CH<sub>2</sub>Ph), 74.3 (CH<sub>2</sub>Ph), 73.4 (2-C), 72.9, 72.8 (CH<sub>2</sub>Ph), 70.1 (5'-C), 68.2 (6''-C), 59.1 (6-C), 57.5 (4-C), 55.4 (2''-C), 50.3 (6'-C) and 31.8 (5-C) (thirteen peaks overlapped or missing);  $m/z$  (ES) 1255.8 (50%, MNa<sup>+</sup>) and 348.2 (100); (Found: MNa<sup>+</sup>, 1255.4866. C<sub>68</sub>H<sub>68</sub>O<sub>13</sub>N<sub>10</sub> requires *MNa*, 1255.4865).

**(1*R*,2*R*,4*R*,5*R*)-1-*O*-(6'-Azido-6'-deoxy-2',3',4'-tri-*O*-benzyl- $\alpha$ -D-glucopyranosyl)-2,5-diazido-cyclohexane-1,4-diol 28A**

By method B, the glycosyl donor **21A** (3.16 g, 1.0 eq., 5.57 mmol) and the acceptor **13** (1.40 g, 1.2 eq., 7.06 mmol) gave a crude product which was purified by flash chromatography on silica gel (gradient elution: 9:1, 8:2  $\rightarrow$  7:3 petrol–EtOAc) to give a mixture of diastereomeric monoglycosylated products (1.17 g, 32%; *ca.* 70:15:15 **28A** : **28b** : **28'A**) and a mixture of diastereomeric diglycosylated products (1.98 g, 32%; *ca.* 70:20:10 **28AA** : **28Ab** : **28'AA**).

For analytical purposes, a sample (201 mg) of the mixture of diastereomeric monoglycosylated products was purified by preparative HPLC to give **28A** (82.5 mg, 13%) as a yellow oil,  $R_f$  0.34 (8:2 petrol–EtOAc);  $[\alpha]_D +41.8$  (c. 0.90 in CHCl<sub>3</sub>);  $\nu_{\max}/\text{cm}^{-1}$  (film) 3450, 2927, 2102, 1756, 1255 and 1071;  $\delta_H$  (500 MHz, CDCl<sub>3</sub>) 7.40-7.25 (15H, m, Ph), 4.98 (1H, d,  $J$  10.9, CH<sub>A</sub>HPh), 4.91 (1H, d,  $J$  10.9, CH<sub>B</sub>HPh), 4.84 (1H, d,  $J$  3.3, 1'-H), 4.83 (1H, d,  $J$  10.9, CHH<sub>A</sub>Ph), 4.78 (1H, d,  $J$  11.8, CH<sub>C</sub>HPh), 4.62 (1H, d,  $J$  11.8, CHH<sub>C</sub>Ph), 4.58 (1H, d,  $J$  10.9, CHH<sub>B</sub>Ph), 3.92 (1H, t,  $J$  9.3, 3'-H), 3.87-3.81 (1H, m, 5'-H), 3.75-3.64 (3H, m, 1-H, 4-H, 2-H or 5-H), 3.59-3.54 (1H, m, 2-H or 5-H), 3.33 (1H, dd,  $J$  9.3 and 3.3, 2'-H), 3.47 (1H, dd,  $J$  13.1 and 2.4, 6'-H<sub>A</sub>), 3.50-3.42 (1H, m, 4'-H), 3.34 (1H, dd,  $J$  13.1 and 5.7, 6'-H<sub>B</sub>), 2.07-2.00 (1H, m, 3-H or 6-H), 2.00-1.95 (1H, m, 3-H or 6-H), 1.94-1.88 (1H, m, 3-H or 6-H) and



1.88-1.80 (1H, m, 3-H or 6-H);  $\delta_C$  (125 MHz, CDCl<sub>3</sub>) 138.5, 138.1, 137.7 (*o*-Ph), 128.7, 128.6, 128.5, 128.2, 128.1, 128.0, 127.9, 127.8 (Ph), 97.4 (1'-C), 81.4 (3'-C), 80.2 (2'-C), 77.3 (4'-C), 75.7 (C<sub>A</sub>H<sub>2</sub>Ph), 75.4 (C<sub>B</sub>H<sub>2</sub>Ph), 74.7 (1-C or 4-C), 73.9 (C<sub>C</sub>H<sub>2</sub>Ph), 71.0 (5'-C), 68.6 (1-C or 4-C), 61.9, 59.0 (2-C and 5-C), 51.4 (6'-C), 32.1, 30.8 (3-C and 6-H) (one aromatic peak overlapped or missing); *m/z* (ES) 677.9 (50, MNa<sup>+</sup>), 672.9 (100, MNH<sub>4</sub><sup>+</sup>) and 429.9 (58); (Found: MNa<sup>+</sup>, 678.2781 C<sub>33</sub>H<sub>37</sub>O<sub>6</sub>N<sub>9</sub> requires MNa, 678.2765).

Also obtained was (*1S,2S,4S,5S*)-1-*O*-(6'-Azido-6'-deoxy-2',3',4'-tri-*O*-benzyl- $\alpha$ -D-glucopyranosyl)-2,5-diazido-cyclohexane-1,4-diol **28'A** (20.3 mg, 3%) as a yellow oil, *R<sub>f</sub>* 0.34 (8:2 petrol–EtOAc);  $[\alpha]_D^{25} +54.0$  (c. 1.00 in CHCl<sub>3</sub>);  $\nu_{\max}/\text{cm}^{-1}$  (film) 3453, 2926, 2102, 1255 and 1071;  $\delta_H$  (500 MHz, CDCl<sub>3</sub>) 7.40-7.25 (15H, m, Ph), 4.98 (1H, d, *J* 10.9, CH<sub>A</sub>HPh), 4.91 (1H, d, *J* 11.0, CH<sub>B</sub>HPh), 4.83 (1H, d, *J* 10.9, CHH<sub>A</sub>·Ph), 4.81 (1H, d, *J* 3.9, 1'-H), 4.79 (1H, d, *J* 11.9, CH<sub>C</sub>HPh), 4.63 (1H, d, *J* 11.9, CHH<sub>C</sub>·Ph), 4.58 (1H, d, *J* 11.0, CHH<sub>B</sub>·Ph), 3.92 (1H, t, *J* 9.3, 3'-H), 3.88-3.86 (2H, m, 2-H and 5-H), 3.85-3.81 (1H, m, 5'-H), 3.80-3.73 (2H, m, 1-H and 4-H), 3.54 (1H, dd, *J* 9.3 and 3.6, 2'-H), 3.47 (1H, dd, *J* 13.1 and 2.3, 6'-H<sub>A</sub>), 3.46-3.42 (1H, m, 4'-H), 3.32 (1H, dd, *J* 13.1 and 5.8, 6'-H<sub>B</sub>), 2.14-2.08 (1H, br. s, OH), 2.08-1.99 (2H, m, 3-H<sub>A</sub> and 6-H<sub>A</sub>), 1.99-1.91 (1H, m, 3-H<sub>B</sub> or 6-H<sub>B</sub>) and 1.77-1.69 (1H, m, 3-H<sub>B</sub> or 6-H<sub>B</sub>);  $\delta_C$  (125 MHz, CDCl<sub>3</sub>) 138.5, 138.1, 137.7 (*o*-Ph), 128.9, 128.8, 128.4, 128.1, 127.9, 127.8 (Ph), 95.9 (1'-C), 81.4 (3'-C), 79.7 (2'-C), 78.2 (4'-C), 75.6 (C<sub>A</sub>H<sub>2</sub>Ph), 75.4 (C<sub>B</sub>H<sub>2</sub>Ph), 73.8 (C<sub>C</sub>H<sub>2</sub>Ph), 73.4 (1-C or 4-C), 70.9 (5'-C), 68.9 (1-C or 4-C), 61.7, 59.8 (2-C and 5-C), 51.3 (6'-C), 32.4 and 28.8 (3-C and 6-H) (two aromatic peaks overlapped or missing); *m/z* (ES) 678.3 (35%, MNa<sup>+</sup>), 673.3 (67, MNH<sub>4</sub><sup>+</sup>) and 430.2 (100); (Found: MNa<sup>+</sup>, 678.2780. C<sub>33</sub>H<sub>37</sub>O<sub>6</sub>N<sub>9</sub> requires MNa, 678.2765).

Also obtained was (*1R,2R,4R,5R*)-1-*O*-(6'-Azido-6'-deoxy-2',3',4'-tri-*O*-benzyl- $\beta$ -D-glucopyranosyl)-2,5-diazido-cyclohexane-1,4-diol **28b** (22.3 mg, 4%; 90:10 mixture of diastereoisomers) as a yellow oil, *R<sub>f</sub>* 0.34 (8:2 petrol–EtOAc);  $[\alpha]_D^{25} +1.4$  (c. 1.10 in CHCl<sub>3</sub>);  $\nu_{\max}/\text{cm}^{-1}$  (film) 3435, 2917, 2101, 1756, 1254, 1070, 736 and 698;  $\delta_H$  (500 MHz, CDCl<sub>3</sub>) 7.40-7.25 (15H, m, Ph), 4.94 (1H, d, *J* 10.9, CH<sub>A</sub>HPh), 4.87 (1H, d, *J* 11.0, CH<sub>B</sub>HPh), 4.85 (1H, d, *J* 11.0, CH<sub>C</sub>HPh), 4.82 (1H, d, *J* 10.9, CHH<sub>A</sub>·Ph), 4.78 (1H, d, *J* 11.0, CHH<sub>C</sub>·Ph), 4.58 (1H, d, *J* 11.0, CHH<sub>B</sub>·Ph), 4.51 (1H, d, *J* 7.8, 1'-H), 4.03-3.98 (1H, m, 2-H or 5-H), 3.95-3.91

(1H, m, 1-H or 4-H), 3.75-3.63 (3H, m, 1-H or 4-H, 3'-H and 2-H or 5-H), 3.51-3.41 (5H, m, 2-H or 5-H, 2'-H, 4'-H, 5'-H, 6'-H<sub>A</sub>), 3.28 (1H, dd, *J* 13.1 and 5.7, 6'-H<sub>B</sub>), 2.10-2.01 (2H, m, 3-H<sub>A</sub> and 6-H<sub>A</sub>), 1.93 (1H, ddd, *J* 13.9, 10.5 and 3.3, 3-H<sub>B</sub> or 6-H<sub>B</sub>) and 1.75 (1H, ddd, *J* 14.0, 11.3 and 2.6, 3-H<sub>B</sub> or 6-H<sub>B</sub>);  $\delta_C$  (125 MHz, CDCl<sub>3</sub>) 138.5, 138.1, 137.7 (*o*-Ph), 128.9, 128.8, 128.5, 128.2, 128.1, 128.0 (Ph), 102.3 (1'-C), 84.4 (3'-C), 82.1 (2'-C), 78.2 (4'-C), 75.8 (*C<sub>A</sub>H<sub>2</sub>Ph*), 75.3 (*C<sub>C</sub>H<sub>2</sub>Ph*), 75.2 (*C<sub>B</sub>H<sub>2</sub>Ph*), 75.1 (1-C or 4-C), 74.8 (5'-C), 68.6 (1-C or 4-C), 61.9, 59.9 (2-C and 5-C), 51.2 (6'-C) and 32.1, 29.5 (3-C and 6-H) (two aromatic peaks overlapped or missing); *m/z* (ES) 678.3 (35%, MNa<sup>+</sup>), 673.3 (67, MNH<sub>4</sub><sup>+</sup>) and 430.2 (100); (Found: MNa<sup>+</sup>, 678.2781. C<sub>33</sub>H<sub>37</sub>O<sub>6</sub>N<sub>9</sub> requires *MNa*, 678.2765).

For analytical purposes, a sample (424 mg) of the mixture of diastereomeric diglycosylated products was purified by preparative HPLC to give (*1R,2R,4R,5R*)-*1-O*-(6'-Azido-6'-deoxy-2',3',4'-tri-*O*-benzyl- $\alpha$ -D-glucopyranosyl)-4-*O*-(6''-Azido-6''-deoxy-2'',3'',4''-tri-*O*-benzyl- $\alpha$ -D-glucopyranosyl)-2,5-diazido-cyclohexane-1,4-diol **28AA** (200.2 mg, 15%) as a yellow oil, *R<sub>f</sub>* 0.53 (8:2 petrol–EtOAc);  $[\alpha]_D +46.4$  (c. 1.12 in CHCl<sub>3</sub>);  $\nu_{\max}/\text{cm}^{-1}$  (film) 2922, 2102, 1285 and 1072;  $\delta_H$  (500 MHz, CDCl<sub>3</sub>) 7.40-7.10 (30H, m, Ph), 5.02 (2H, d, *J* 10.9, CH<sub>A</sub>HPh), 4.95-4.90 (4H, m, 1'-H, 1''-H and CH<sub>B</sub>HPh), 4.85 (2H, d, *J* 10.9, CHH<sub>A</sub>Ph), 4.77 (2H, d, *J* 11.8, CH<sub>C</sub>HPh), 4.68 (2H, d, *J* 11.8, CHH<sub>C</sub>Ph), 4.58 (2H, d, *J* 10.9, CHH<sub>B</sub>Ph), 3.97 (2H, t, *J* 9.3, 3'-H and 3''-H), 3.88-3.83 (2H, m, 5'-H and 5''-H), 3.70-3.63 (4H, m, 1-H, 2-H, 4-H and 5-H), 3.54 (2H, dd, *J* 9.3 and 3.6, 2'-H and 2''-H), 3.48-3.41 (4H, m, 4'-H, 4''-H, 6'-H<sub>A</sub> and 6''-H<sub>A</sub>), 3.34 (2H, dd, *J* 13.1 and 5.8, 6'-H<sub>B</sub> and 6''-H<sub>B</sub>), 2.12-2.02 (2H, m, 3-H<sub>A</sub> and 6-H<sub>A</sub>) and 1.98-1.89 (2H, m, 3-H<sub>B</sub> and 6-H<sub>B</sub>);  $\delta_C$  (125 MHz, CDCl<sub>3</sub>) 138.6, 138.1, 137.8 (*o*-Ph), 129.1, 128.6, 128.4, 128.5, 128.3, 128.1, 127.9, 127.7 (Ph), 97.8 (1'-C and 1''-C), 81.4 (3'-C and 3''-C), 80.0 (2'-C and 2''-C), 78.4 (4'-C and 4''-C), 75.7 (*C<sub>A</sub>H<sub>2</sub>Ph*), 75.4 (*C<sub>B</sub>H<sub>2</sub>Ph*), 74.9 (1-C and 4-C), 73.6 (*C<sub>C</sub>H<sub>2</sub>Ph*), 70.9 (5'-C and 5''-C), 59.5 (2-C and 5-C), 51.5 (6'-H and 6''-C) and 31.4 (3-C and 6-C) (one aromatic peak overlapped or missing); *m/z* (ES) 1135.4 (80, MNa<sup>+</sup>) and 430.2 (100); (Found: MNa<sup>+</sup>, 1135.4800. C<sub>60</sub>H<sub>64</sub>O<sub>10</sub>N<sub>12</sub> requires *MNa*, 1135.4766).

Also obtained was (*1S,2S,4S,5S*)-*1-O*-(6'-Azido-6'-deoxy-2',3',4'-tri-*O*-benzyl- $\alpha$ -D-glucopyranosyl)-4-*O*-(6''-Azido-6''-deoxy-2'',3'',4''-tri-*O*-benzyl- $\alpha$ -D-glucopyranosyl)-2,5-

*diazido-cyclohexane-1,4-diol* **28'AA** (31.7 mg, 2%) as a yellow oil,  $R_f$  0.53 (8:2 petrol–EtOAc);  $[\alpha]_D +61.6$  (c. 1.00 in  $\text{CHCl}_3$ );  $\nu_{\text{max}}/\text{cm}^{-1}$  (film) 2925, 2102, 1086 and 1072;  $\delta_{\text{H}}$  (500 MHz,  $\text{CDCl}_3$ ) 7.40–7.20 (30H, m, Ph), 5.02 (2H, d,  $J$  10.8,  $\text{CH}_A\text{HPh}$ ), 4.92 (2H, d,  $J$  11.1,  $\text{CH}_B\text{HPh}$ ), 4.84 (2H, d,  $J$  10.8,  $\text{CHH}_A\text{Ph}$ ), 4.81 (2H, d,  $J$  12.0,  $\text{CH}_C\text{HPh}$ ), 4.79 (2H, d,  $J$  4.9, 1'-H and 1''-H), 4.63 (2H, d,  $J$  12.0,  $\text{CHH}_C\text{Ph}$ ), 4.60 (2H, d,  $J$  11.1,  $\text{CHH}_B\text{Ph}$ ), 4.00 (2H, t,  $J$  9.3, 3'-H and 3''-H), 3.97–3.90 (2H, m, 5'-H and 5''-H), 3.87–3.81 (2H, m, 2-H and 5-H), 3.75–3.68 (2H, m, 1-H and 4-H), 3.58–3.53 (2H, m, 2'-H and 2''-H), 3.51–3.43 (4H, m, 4'-H, 4''-H, 6'- $\text{H}_A$  and 6''- $\text{H}_A$ ), 3.43 (2H, dd,  $J$  13.1 and 5.5, 6'- $\text{H}_B$  and 6''- $\text{H}_B$ ), 2.00–1.92 (2H, m, 3- $\text{H}_A$  and 6- $\text{H}_A$ ) and 1.89–1.81 (2H, m, 3- $\text{H}_B$  and 6- $\text{H}_B$ );  $\delta_{\text{C}}$  (125 MHz,  $\text{CDCl}_3$ ) 138.4, 137.9 (*o*-Ph), 128.7, 128.5, 128.4, 128.2, 128.1, 128.0, 127.9, 127.7 (Ph), 95.5 (1'-C and 1''-C), 81.6 (3'-C and 3''-C), 79.7 (2'-C and 2''-C), 78.3 (4'-C and 4''-C), 75.8 ( $\text{C}_A\text{H}_2\text{Ph}$ ), 75.2 ( $\text{C}_B\text{H}_2\text{Ph}$ ), 73.9 ( $\text{C}_C\text{H}_2\text{Ph}$ ), 73.4 (1-C and 4-C), 70.8 (5'-C and 5''-C), 59.7 (2-C and 5-C), 51.3 (6'-H and 6''-C) and 29.6 (3-C and 6-C) (two aromatic peaks overlapped or missing);  $m/z$  (ES) 1135.4 (69,  $\text{M}^+ + \text{Na}$ ), 1085.5 (60) and 430.2 (100); (Found:  $\text{MNa}^+$ , 1135.4792.  $\text{C}_{60}\text{H}_{64}\text{O}_{10}\text{N}_{12}$  requires  $\text{MNa}$ , 1135.4766).

Also obtained was (*1R,2R,4R,5R*)-1-*O*-(6'-Azido-6'-deoxy-2',3',4'-tri-*O*-benzyl- $\beta$ -*D*-glucopyranosyl)-4-*O*-(6''-Azido-6''-deoxy-2'',3'',4''-tri-*O*-benzyl- $\alpha$ -*D*-glucopyranosyl)-2,5-diazido-cyclohexane-1,4-diol **28Ab** (69.6 mg, 16%; 80:20 mixture of diastereoisomers) as a yellow oil,  $R_f$  0.53 (8:2 petrol–EtOAc);  $[\alpha]_D +18.0$  (c. 1.00 in  $\text{CHCl}_3$ );  $\nu_{\text{max}}/\text{cm}^{-1}$  (film) 2917, 2102, 1285 and 1072;  $\delta_{\text{H}}$  (500 MHz,  $\text{CDCl}_3$ ) 7.45–7.20 (30H, m, Ph), 5.03 (1H, d,  $J$  3.4, 1''-H), 4.99 (1H, d,  $J$  10.9,  $\text{CH}_A\text{HPh}$ ), 4.94 (1H, d,  $J$  11.0,  $\text{CH}_B\text{HPh}$ ), 4.90 (1H, d,  $J$  10.9,  $\text{CH}_C\text{HPh}$ ), 4.88 (1H, d,  $J$  10.8,  $\text{CH}_E\text{HPh}$ ), 4.87 (1H, d,  $J$  11.0,  $\text{CH}_D\text{HPh}$ ), 4.82 (1H, d,  $J$  11.0,  $\text{CHH}_B\text{Ph}$ ), 4.81 (1H, d,  $J$  10.8,  $\text{CHH}_E\text{Ph}$ ), 4.79 (1H, d,  $J$  10.9,  $\text{CHH}_A\text{Ph}$ ), 4.75 (2H, d,  $J$  11.6,  $\text{CH}_F\text{HPh}$  and  $\text{CHH}_F\text{Ph}$ ), 4.58 (1H, d,  $J$  11.0,  $\text{CHH}_D\text{Ph}$ ), 4.57 (1H, d,  $J$  10.9,  $\text{CHH}_C\text{Ph}$ ), 4.51 (1H, d,  $J$  7.7, 1'-H), 4.00–3.94 (2H, m, 3''-H and 2-H or 5-H), 3.91–3.84 (2H, m, 4''-H and 1-H or 4-H), 3.69–3.62 (3H, m, 1-H or 4-H, 3'-H and 2-H or 5-H), 3.54 (1H, dd,  $J$  9.7 and 3.4, 2''-H), 3.51–3.40 (6H, m, 2'-H, 4'-H, 5'-H, 6'- $\text{H}_A$ , 5''-H and 6''- $\text{H}_A$ ), 3.34 (1H, dd,  $J$  13.1 and 5.6, 6''- $\text{H}_B$ ), 3.31–3.26 (1H, m, 6'- $\text{H}_B$ ), 2.13–1.93 (3H, m, 3-H and 6-H) and 1.87–1.78 (1H, m, 3-H or 6-H);  $\delta_{\text{C}}$  (125 MHz,  $\text{CDCl}_3$ ) 138.4, 137.9, 137.7, 137.4, 137.1 (*o*-Ph), 128.3, 128.2, 128.1,

128.0, 127.9, 127.8, 127.7 (Ph), 102.6 (1'-C), 98.2 (1''-C), 84.4 (3'-C), 82.1 (2'-C), 81.4 (3''-C), 80.1 (2''-C), 78.3 (4'-C), 76.5 (1-C or 4-C), 75.6 ( $C_BH_2Ph$  and  $C_EH_2Ph$ ), 75.5 (4''-C and  $C_AH_2Ph$ ), 75.1 ( $C_CH_2Ph$  and  $C_DH_2Ph$ ), 74.6 (5'-C and 5''-C), 73.2 ( $C_FH_2Ph$ ), 70.8 (1-C or 4-C), 60.2, 60.1 (2-C and 5-C), 51.4 (6'-C and 6''-C), 31.4 and 30.2 (3-C and 6-C) (12 aromatic peaks overlapped or missing);  $m/z$  (ES) 1135.6 (100,  $M^+Na$ ), 575.2 (67) and 430.3 (100); (Found:  $MNa^+$ , 1135.4806.  $C_{60}H_{64}O_{10}N_{12}$  requires  $MNa$ , 1135.4766).

**(1*R*,2*R*,4*R*,5*R*)-1-*O*-(6'-Azido-6'-deoxy-2',3',4'-tri-*O*-benzyl- $\alpha$ -D-glucopyranosyl)-4-*O*-(6''-Azido-6''-deoxy-2'',3'',4''-tri-*O*-benzyl- $\alpha$ -L-glucopyranosyl)-2,5-diazido-cyclohexane-1,4-diol 28AA'**

By method A, the glycosyl donor **21A'** (242 mg, 1.2 eq., 0.43 mmol) and the acceptor **28A** (233 mg, 1.0 eq., 0.36 mmol; *ca.* 70:15:15 **28A** : **28b** : **28'A**) gave a crude mixture which was purified by flash chromatography on silica gel (8:2 petrol–EtOAc) and preparative HPLC to give **28AA'** (83.4 mg, 21%) as a yellow oil,  $R_f$  0.33 (8:2 petrol–EtOAc);  $[\alpha]_D -11.2$  (c. 1.00 in  $CHCl_3$ );  $\nu_{max}/cm^{-1}$  (film) 3031, 2922, 2102, 1285 and 1072;  $\delta_H$  (500 MHz,  $CDCl_3$ ) 7.45-7.20 (30H, m, Ph), 5.02 (1H, d,  $J$  10.9,  $CH_AHPh$ ), 5.01 (1H, d,  $J$  10.9,  $CH_BHPh$ ), 4.95 (1H, d,  $J$  3.6, 1'-H or 1''-H), 4.92 (1H, d,  $J$  11.8,  $CH_CHPh$ ), 4.91 (1H, d,  $J$  10.7,  $CH_DHPh$ ), 4.85 (1H, d,  $J$  10.9,  $CHH_APh$ ), 4.84 (1H, d,  $J$  10.9,  $CHH_BPh$ ), 4.81 (1H, d,  $J$  3.7, 1'-H or 1''-H), 4.79 (1H, d,  $J$  11.9,  $CH_EHPh$ ), 4.77 (1H, d,  $J$  11.9,  $CH_FHPh$ ), 4.72 (1H, d,  $J$  11.9,  $CHH_FPh$ ), 4.63 (1H, d,  $J$  11.9,  $CHH_EPh$ ), 4.59 (1H, d,  $J$  11.8,  $CHH_CPh$ ), 4.58 (1H, d,  $J$  10.7,  $CHH_DPh$ ), 3.98 (1H, t,  $J$  9.3, 3'-H or 3''-H), 3.97 (1H, t,  $J$  9.3, 3'-H or 3''-H), 3.92-3.85 (2H, m, 5'-H and 5''-H), 3.84-3.78 (1H, m, 2-H or 5-H), 3.77-3.65 (3H, m, 1-H, 4-H and 2-H or 5-H), 3.55 (2H, dd,  $J$  9.3 and 3.6, 2'-H and 2''-H), 3.51-3.42 (4H, m, 4'-H, 4''-H, 6'-H<sub>A</sub> and 6''-H<sub>A</sub>), 3.38-3.30 (2H, m, 6'-H<sub>B</sub> and 6''-H<sub>B</sub>), 2.07-1.99 (3H, m, 3-H and 6-H) and 1.84-1.77 (1H, m, 3-H or 6-H);  $\delta_C$  (125 MHz,  $CDCl_3$ ) 138.6, 138.5, 138.1, 138.0, 137.9, 137.8 (*o*-Ph), 128.7, 128.6, 128.5, 128.4, 128.2, 128.1, 128.0, 127.9, 127.7 (Ph), 98.1, 95.8 (1'-C and 1''-C), 81.6, 81.4 (3'-C and 3''-C), 80.1, 79.7 (2'-C and 2''-C), 78.3, 78.2 (4'-C and 4''-C), 75.8 (1-C and 4-C), 75.7, 75.6 ( $C_CH_2Ph$  and  $C_DH_2Ph$ ), 75.4, 75.2 ( $C_AH_2Ph$  and  $C_BH_2Ph$ ), 73.8, 73.5 ( $C_EH_2Ph$  and  $C_FH_2Ph$ ), 73.4 (1-C and 4-C), 70.9 (5'-C and 5''-C), 59.9, 59.7 (2-C and 5-C), 51.5, 51.3

(6'-H and 6''-C), 31.7 and 29.5 (3-C and 6-C) (nine aromatic peaks overlapped or missing);  $m/z$  (ES) 1135.5 (45,  $MNa^+$ ) and 430.2 (100); (Found:  $MNa^+$ , 1135.4784.  $C_{60}H_{64}O_{10}N_{12}$  requires  $MNa$ , 1135.4766).

Also obtained was (1*S*,2*S*,4*S*,5*S*)-1-*O*-(6'-Azido-6'-deoxy-2',3',4'-tri-*O*-benzyl- $\alpha$ -D-glucopyranosyl)-4-*O*-(6''-Azido-6''-deoxy-2'',3'',4''-tri-*O*-benzyl- $\alpha$ -L-glucopyranosyl)-2,5-diazido-cyclohexane-1,4-diol **28'AA'** (22.0 mg, 5%) as a yellow oil,  $R_f$  0.33 (8:2 petrol–EtOAc);  $[\alpha]_D +4.4$  (c. 1.00 in  $CHCl_3$ );  $\nu_{max}/cm^{-1}$  (film) 3031, 2917, 2102, 1285 and 1071;  $\delta_H$  (500 MHz,  $CDCl_3$ ) 7.45-7.20 (30H, m, Ph), 5.00 (1H, d,  $J$  10.9,  $CH_A$ HPh), 4.99 (1H, d,  $J$  4.6, 1''-H), 4.93 (1H, d,  $J$  10.9,  $CH_B$ HPh), 4.91 (1H, d,  $J$  11.0,  $CH_C$ HPh), 4.89 (1H, d,  $J$  11.1,  $CH_D$ HPh), 4.87 (1H, d,  $J$  11.0,  $CH_F$ HPh), 4.80 (2H, d,  $J$  10.9,  $CHH_A$ ·Ph and  $CHH_B$ ·Ph), 4.77 (1H, d,  $J$  11.1,  $CHH_D$ ·Ph), 4.75 (1H, d,  $J$  11.8,  $CH_F$ HPh), 4.72 (1H, d,  $J$  11.8,  $CHH_F$ ·Ph), 4.59 (1H, d,  $J$  11.0,  $CHH_E$ ·Ph), 4.56 (1H, d,  $J$  11.0,  $CHH_C$ ·Ph), 4.55 (1H, d,  $J$  5.2, 1'-H), 3.95 (1H, t,  $J$  9.3, 3''-H), 3.84-3.78 (2H, m, 5''-H and 1-H or 4-H), 3.78-3.73 (1H, m, 2-H or 5-H), 3.73-3.62 (4H, m, 1-H or 4-H, 3'-H, and 2-H or 5-H), 3.56-3.39 (7H, m, 2''-H, 2'-H, 4'-H, 5'-H, 6'-H<sub>A</sub>, 4''-H and 6''-H<sub>A</sub>), 3.34-3.27 (2H, m, 6''-H<sub>B</sub> and 6'-H<sub>B</sub>), 2.26-2.19 (1H, m, 3-H or 6-H) and 2.04-1.92 (3H, m, 3-H and 6-H);  $\delta_C$  (125 MHz,  $CDCl_3$ ) 138.5, 138.2, 138.1, 137.9, 137.7, 137.6 (*o*-Ph), 128.5, 128.4, 128.1, 128.0, 127.9, 127.8, 127.7 (Ph), 103.6 (1'-C), 97.8 (1''-C), 84.4 (3'-C), 82.2 (2'-C), 81.4 (3''-C), 79.9 (2''-C), 78.2, 77.9 (4'-C and 4''-C), 75.9, 75.6, 75.4, 75.3, 75.2, 74.4 (5'-C), 73.4, 70.8 (5''-C), 59.8, 59.6 (2-C and 5-C), 51.4, 51.1 (6'-C and 6''-C), 31.6 and 31.4 (3-C and 6-C) (11 aromatic peaks overlapped or missing);  $m/z$  (ES) 1135.9 (55,  $MNa^+$ ) and 430.3 (100); (Found:  $MNa^+$ , 1135.4769.  $C_{60}H_{64}O_{10}N_{12}$  requires  $MNa$ , 1135.4766).

Also obtained was (1*R*,2*R*,4*R*,5*R*)-1-*O*-(6'-Azido-6'-deoxy-2',3',4'-tri-*O*-benzyl- $\beta$ -D-glucopyranosyl)-4-*O*-(6''-Azido-6''-deoxy-2'',3'',4''-tri-*O*-benzyl- $\alpha$ -L-glucopyranosyl)-2,5-diazido-cyclohexane-1,4-diol **28A'b** (40.3 mg, 10%) as a yellow oil,  $R_f$  0.33 (8:2 petrol–EtOAc);  $[\alpha]_D -24.0$  (c. 1.00 in  $CHCl_3$ );  $\nu_{max}/cm^{-1}$  (film) 3031, 2920, 2102, 1285 and 1071;  $\delta_H$  (500 MHz,  $CDCl_3$ ) 7.40-7.20 (30H, m, Ph), 4.96 (1H, d,  $J$  10.8,  $CH_A$ HPh), 4.95 (1H, d,  $J$  10.6,  $CH_B$ HPh), 4.92 (1H, d,  $J$  10.6,  $CH_C$ HPh), 4.88 (2H, d,  $J$  10.8,  $CH_D$ HPh and  $CHH_A$ ·Ph), 4.84 (1H, d,  $J$  11.7,  $CH_E$ HPh), 4.83 (1H, d,  $J$  4.1, 1''-H), 4.82 (1H, d,  $J$  10.6,

CHH<sub>C</sub>·Ph), 4.79 (1H, d, *J* 11.7, CHH<sub>E</sub>·Ph), 4.78 (1H, d, *J* 10.2, CH<sub>F</sub>HPh), 4.68 (1H, d, *J* 10.2, CHH<sub>F</sub>·Ph), 4.61 (1H, d, *J* 10.6, CHH<sub>B</sub>·Ph), 4.69 (1H, d, *J* 10.8, CHH<sub>D</sub>·Ph), 4.52 (1H, d, *J* 7.7, 1'-H), 4.03-3.94 (2H, m, 3''-H and 2-H or 5-H), 3.94-3.86 (1H, m, 1-H or 4-H), 3.75-3.62 (3H, m, 1-H or 4-H, 3'-H and 2-H or 5-H), 3.56 (1H, dd, *J* 9.7 and 3.6, 2''-H), 3.53-3.42 (7H, m, 2'-H, 4'-H, 4''-H, 5'-H, 5''-H, 6'-H<sub>A</sub> and 6''-H<sub>A</sub>), 3.42-3.25 (2H, m, 6'-H<sub>B</sub> and 6''-H<sub>B</sub>), 2.09-1.93 (3H, m, 3-H and 6-H) and 1.93-1.81 (1H, m, 3-H or 6-H); δ<sub>C</sub> (125 MHz, CDCl<sub>3</sub>) 138.9, 138.6, 138.4, 138.3, 138.0 (*o*-Ph), 129.0, 128.9, 128.8, 128.6, 128.5, 128.4, 128.3, 128.2, 128.1 (Ph), 103.0 (1'-C), 94.9 (1''-C), 84.8 (3'-C), 82.6 (2'-C), 82.1 (3''-C), 80.1 (2''-C), 78.5, 78.4 (4'-C and 4''-C), 76.2, 76.1, 75.9, 75.6, 75.5, 74.9, 73.4 (C<sub>A</sub>H<sub>2</sub>Ph, C<sub>B</sub>H<sub>2</sub>Ph, C<sub>D</sub>H<sub>2</sub>Ph, C<sub>E</sub>H<sub>2</sub>Ph, C<sub>F</sub>H<sub>2</sub>Ph, 1-C and 4-C), 74.2 (5'-C and 5''-C), 71.0 (C<sub>C</sub>H<sub>2</sub>Ph), 60.1 (2-C and 5-C), 51.7, 51.6 (6'-H and 6''-C), 30.9, 29.4 (3-C and 6-C) (10 aromatic peaks overlapped or missing); *m/z* (ES) 1135.5 (40, MNa<sup>+</sup>), 1085.5 (35) and 430.2 (100); (Found: MNa<sup>+</sup>, 1135.4758. C<sub>60</sub>H<sub>64</sub>O<sub>10</sub>N<sub>12</sub> requires *MNa*, 1135.4766).

**(1*R*,2*R*,4*R*,5*R*)-1-*O*-(6'-Azido-6'-deoxy-2',3',4'-tri-*O*-benzyl-α-*D*-glucopyranosyl)-4-*O*-(6''-Azido-6''-deoxy-2'',3'',4''-tri-*O*-benzoyl-β-*D*-glucopyranosyl)-2,5-diazido-cyclohexane-1,4-diol 28AB**

By method A, glycosyl donor **21B** (260 mg, 1.2 eq., 0.43 mmol) and the acceptor **28A** (233 mg, 0.36 mmol; *ca.* 70:15:15 **28A** : **28b** : **28'A**) gave a crude mixture which was purified by flash chromatography on silica gel (gradient elution: 7:3 → 6:4 petrol–EtOAc) and preparative HPLC to give **28AB** (185 mg, 45%) as a yellow oil, *R*<sub>f</sub> 0.35 (7:3 petrol–EtOAc); [α]<sub>D</sub> –6.67 (c. 1.14 in CHCl<sub>3</sub>); ν<sub>max</sub>/cm<sup>-1</sup> (film) 2929, 2101, 1732, 1259 and 1070; δ<sub>H</sub> (500 MHz, CDCl<sub>3</sub>) 7.98 (2H, d, *J* 7.3, Bz), 7.92 (2H, d, *J* 7.5, OBz), 7.84 (2H, d, *J* 7.4, Bz), 7.56-7.47 (1H, m, Bz), 7.47-7.14 (23H, m, Ar), 5.92 (1H, t, *J* 9.7, 3''-H), 5.60-5.43 (2H, m, 2''-H and 4''-H), 4.96 (1H, d, *J* 10.8, CH<sub>A</sub>HPh), 4.95 (1H, d, *J* 6.8, 1''-H), 4.92 (1H, d, *J* 11.0, CH<sub>B</sub>HPh), 4.89 (1H, d, *J* 4.6, 1'-H), 4.78 (1H, d, *J* 10.8, CHH<sub>A</sub>·Ph), 4.67-4.55 (3H, m, CHH<sub>B</sub>·Ph, CH<sub>C</sub>HPh and CHH<sub>C</sub>·Ph), 4.06-3.96 (1H, m, 5''-H), 3.96-3.90 (2H, m, 1-H or 4-H and 2-H or 5-H), 3.88 (1H, t, *J* 9.5, 3'-H), 3.84-3.77 (1H, m, 5'-H), 3.62-3.51 (2H, m, 6''-H<sub>A</sub> and 1-H or 4-H), 3.51-3.42 (2H, m, 2'-H and 6'-H<sub>A</sub>), 3.44-3.30 (4H, m, 4'-H, 2-H or 5-H, 6'-

H<sub>B</sub> and 6''-H<sub>B</sub>), 2.14-1.84 (3H, m, 3-H and 6-H) and 1.76-1.62 (1H, m, 3-H or 6-H); δ<sub>C</sub> (125 MHz, CDCl<sub>3</sub>) 166.2, 165.7, 165.4 (C=O), 139.1, 138.6, 138.4 (*o*-Ph), 134.2, 134.1, 133.8 (*o*-Bz), 130.3, 130.2, 130.1, 129.3, 129.2, 129.1, 129.0, 128.9, 128.8, 128.7, 128.5, 128.4, 128.3, 128.2, 128.1, 100.7 (1''-C), 98.3 (1'-C), 81.7 (3'-C), 80.5 (2'-C), 78.5 (4'-C), 76.9 (1-C or 4-C), 76.2, 76.1 (C<sub>A</sub>H<sub>2</sub>Ph and C<sub>B</sub>H<sub>2</sub>Ph), 75.8 (1-C or 4-C), 74.8 (5''-C), 73.5 (C<sub>C</sub>H<sub>2</sub>Ph), 72.7 (3''-C), 72.2 (2''-C), 71.2 (5'-C), 70.5 (4''-C), 60.1, 60.0 (2-C and 5-C), 51.8, 51.7 (6'-H and 6''-C), 31.6 and 30.7 (3-C and 6-C) (three aromatic peaks overlapped or missing); *m/z* (ES) 1177.4 (60, MNa<sup>+</sup>), 760.3 (27) and 430.2 (100); (Found: MNa<sup>+</sup>, 1177.4193. C<sub>60</sub>H<sub>58</sub>O<sub>13</sub>N<sub>12</sub> requires MNa, 1177.4144).

Also obtained was (1*S*,2*S*,4*S*,5*S*)-1-*O*-(6'-Azido-6'-deoxy-2',3',4'-tri-*O*-benzyl-α-*D*-glucopyranosyl)-4-*O*-(6''-Azido-6''-deoxy-2'',3'',4''-tri-*O*-benzoyl-β-*D*-glucopyranosyl)-2,5-diazido-cyclohexane-1,4-diol **28'AB** (11.3 mg, 3%) as a yellow oil, *R*<sub>f</sub> 0.35 (7:3 petrol–EtOAc); [α]<sub>D</sub> +24.8 (c. 1.00 in CHCl<sub>3</sub>); ν<sub>max</sub>/cm<sup>-1</sup> (film) 2926, 2103, 1734, 1260 and 1070; δ<sub>H</sub> (500 MHz, CDCl<sub>3</sub>) 7.98 (2H, dd, *J* 7.2 and 1.4, Bz), 7.91 (2H, dd, *J* 7.2 and 1.0, Bz), 7.81 (2H, dd, *J* 7.3 and 1.3, Bz), 7.57-7.17 (24H, m, Ph), 5.88 (1H, t, *J* 9.7, 3''-H), 5.58-5.44 (2H, m, 2''-H and 4''-H), 5.05 (1H, d, *J* 8.0, 1''-H), 4.97 (1H, d, *J* 10.9, CH<sub>A</sub>HPh), 4.91 (1H, d, *J* 11.1, CH<sub>B</sub>HPh), 4.83 (1H, d, *J* 10.9, CHH<sub>A</sub>-Ph), 4.71 (1H, d, *J* 11.8, CH<sub>C</sub>HPh), 4.69 (1H, d, *J* 4.5, 1'-H), 4.58 (1H, d, *J* 11.1, CHH<sub>B</sub>-Ph), 4.52 (1H, d, *J* 11.8, CHH<sub>C</sub>-Ph), 4.04-3.93 (1H, m, 5''-H), 3.92 (1H, t, *J* 9.4, 3'-H), 3.89-3.69 (3H, m, 1-H or 4-H, 5'-H and 2-H or 5-H), 3.69-3.57 (2H, m, 1-H or 4-H and 2-H or 5-H), 3.52-3.37 (5H, m, 2'-H, 4'-H, 6'-H<sub>A</sub>, 6''-H<sub>A</sub> and 6''-H<sub>B</sub>), 3.31 (1H, dd, *J* 13.1 and 5.4, 6'-H<sub>B</sub>), 2.25-2.08 (2H, m, 3-H or 6-H), 1.94-1.82 (1H, m, 3-H<sub>A</sub> or 6-H<sub>A</sub>) and 1.75-1.53 (1H, m, 3-H<sub>B</sub> or 6-H<sub>B</sub>); δ<sub>C</sub> (125 MHz, CDCl<sub>3</sub>) 165.7, 165.3, 165.1 (C=O), 138.5, 137.9, 137.8 (*o*-Ph), 133.7, 133.3 (*o*-Bz), 129.9, 129.8, 129.2, 128.7, 128.6, 128.5, 128.4, 128.3, 128.0, 127.9, 127.7 (Ph), 102.1 (1''-C), 95.8 (1'-C), 81.4 (3'-C), 79.4 (2'-C), 78.1 (4'-C), 77.0 (1-C or 4-C), 75.7 (C<sub>A</sub>H<sub>2</sub>Ph), 75.2 (C<sub>B</sub>H<sub>2</sub>Ph), 73.7, 73.6 (C<sub>C</sub>H<sub>2</sub>Ph and 1-C or 4-C), 73.1 (3''-C), 72.6 (5''-C), 71.8 (2''-C or 4''-C), 70.8 (5'-C), 69.9 (2''-C or 4''-C), 59.9 (2-C and 5-C), 51.2 (6'-C and 6''-C), 31.8 and 29.4 (3-C and 6-C) (eight aromatic peaks overlapped or missing); *m/z* (ES) 1177.5 (95, MNa<sup>+</sup>), 760.5 (20) and 430.2 (100); (Found: MNa<sup>+</sup>, 1177.4186. C<sub>60</sub>H<sub>58</sub>O<sub>13</sub>N<sub>12</sub> requires MNa, 1177.4144).

Also obtained was (1*R*,2*R*,4*R*,5*R*)-1-*O*-(6'-Azido-6'-deoxy-2',3',4'-tri-*O*-benzyl-β-*D*-glucopyranosyl)-4-*O*-(6''-Azido-6''-deoxy-2'',3'',4''-tri-*O*-benzoyl-β-*D*-glucopyranosyl)-2,5-diazido-cyclohexane-1,4-diol **28Bb** (20.8 mg, 5%; 90:10 mixture of diastereomers) as a yellow oil, *R*<sub>f</sub> 0.35 (7:3 petrol–EtOAc); [α]<sub>D</sub> +9.1 (c. 1.10 in CHCl<sub>3</sub>); ν<sub>max</sub>/cm<sup>-1</sup> (film) 2924, 2103, 1735, 1260 and 1069; δ<sub>H</sub> (500 MHz, CDCl<sub>3</sub>) 7.98 (2H, d, *J* 7.1, Bz), 7.91 (2H, d, *J* 8.2, Bz), 7.81 (2H, d, *J* 7.4, Bz), 7.58-7.22 (24H, m, Ph), 5.87 (1H, t, *J* 9.7, 3''-H), 5.59-5.41 (2H, m, 2''-H and 4''-H), 4.98 (1H, d, *J* 7.9, 1''-H), 4.98-4.85 (3H, m, CH<sub>A</sub>HPh, CH<sub>B</sub>HPh and CH<sub>C</sub>HPh), 4.73 (1H, d, *J* 10.8, CHH<sub>A</sub>·Ph), 4.55 (2H, d, *J* 10.9, CHH<sub>B</sub>·Ph, and CHH<sub>C</sub>·Ph), 4.43 (1H, d, *J* 7.4, 1'-H), 4.07-3.94 (1H, m, 5''-H), 3.94-3.85 (2H, m, 3'-H and 2-H or 5-H), 3.85-3.69 (2H, m, 5'-H and 1-H or 4-H), 3.64-3.52 (2H, m, 6''-H<sub>A</sub> and 1-H or 4-H), 3.52-3.19 (6H, m, 2'-H, 4'-H, 2-H or 5-H, 6'-H and 6''-H<sub>B</sub>), 2.17-2.07 (1H, m, 3-H<sub>A</sub> or 6-H<sub>A</sub>), 2.07-1.96 (1H, m, 3-H<sub>A</sub> or 6-H<sub>A</sub>) and 1.94-1.78 (2H, m, 3-H<sub>B</sub> and 6-H<sub>B</sub>); *m/z* (ES) 1177.4 (100, MNa<sup>+</sup>), 760.3 (20), 487.2 (48) and 430.2 (98); (Found: MNa<sup>+</sup>, 1177.4180. C<sub>60</sub>H<sub>58</sub>O<sub>13</sub>N<sub>12</sub> requires *MNa*, 1177.4144).

**(1*R*,2*R*,4*R*,5*R*)-1-*O*-(6'-Azido-6'-deoxy-2',3',4'-tri-*O*-benzyl-α-*D*-glucopyranosyl)-4-*O*-(6''-Azido-6''-deoxy-2'',3'',4''-tri-*O*-benzoyl-β-*L*-glucopyranosyl)-2,5-diazido-cyclohexane-1,4-diol **28AB'****

By method A, the glycosyl donor **21B'** (260 mg, 1.2 eq., 0.43 mmol) and the acceptor **28A** (233 mg, 1.0 eq., 0.36 mmol; *ca.* 70:15:15 **28A** : **28b** : **28'A**) gave a crude product which was purified by flash chromatography on silica gel (8:2 petrol–EtOAc) and preparative HPLC to give **28AB'** (171.5 mg, 42%) as a yellow oil, *R*<sub>f</sub> 0.52 (7:3 petrol–EtOAc); [α]<sub>D</sub> +28.6 (c. 1.09 in CHCl<sub>3</sub>); ν<sub>max</sub>/cm<sup>-1</sup> (film) 2927, 2102, 1732, 1259 and 1070; δ<sub>H</sub> (500 MHz, CDCl<sub>3</sub>) 7.97 (2H, dd, *J* 7.3 and 1.0, Bz), 7.92 (2H, dd, *J* 7.3 and 1.0, Bz), 7.82 (2H, d, *J* 7.3, Bz), 7.51 (1H, t, *J* 7.3, Bz), 7.45 (1H, d, *J* 7.3, Bz), 7.42-7.13 (22H, m, Ph), 5.89 (1H, t, *J* 9.7, 3''-H), 5.56-5.48 (2H, m, 2''-H and 4''-H), 5.01 (1H, d, *J* 7.9, 1''-H), 5.00 (1H, d, *J* 11.0, CH<sub>A</sub>HPh), 4.90 (1H, d, *J* 10.9, CH<sub>B</sub>HPh), 4.83 (1H, d, *J* 11.0, CHH<sub>A</sub>·Ph), 4.80 (1H, d, *J* 2.9, 1'-H), 4.76 (1H, d, *J* 11.9, CH<sub>C</sub>HPh), 4.63 (1H, d, *J* 11.9, CHH<sub>C</sub>·Ph), 4.55 (1H, d, *J* 10.9, CHH<sub>B</sub>·Ph), 4.01-3.95 (1H, m, 5''-H), 3.89 (1H, t, *J* 9.3, 3'-H), 3.80-3.74 (1H, m, 5'-H), 3.71-3.66 (1H, m,



1-H or 4-H), 3.66-3.62 (1H, m, 2-H or 5-H), 3.62-3.55 (2H, m, 1-H or 4-H and 2-H or 5-H), 3.55-3.47 (2H, m, 2'-H and 6''-H<sub>A</sub>), 3.45 (1H, dd, *J* 13.4 and 2.6, 6''-H<sub>B</sub>), 3.40 (1H, t, *J* 9.4, 4'-H), 3.33 (1H, dd, *J* 13.1 and 2.2, 6'-H<sub>A</sub>), 3.24 (1H, dd, *J* 13.1 and 5.6, 6'-H<sub>B</sub>), 2.25-2.17 (1H, m, 3-H<sub>A</sub> or 6-H<sub>A</sub>), 2.13-2.05 (1H, m, 3-H<sub>B</sub> or 6-H<sub>B</sub>) and 1.91-1.77 (2H, m, 3-H or 6-H);  $\delta_C$  (125 MHz, CDCl<sub>3</sub>) 165.8, 165.3, 165.2 (C=O), 138.6, 138.2, 137.8 (*o*-Ph), 133.7, 133.4, 133.3 (*o*-Bz), 129.9, 129.8, 129.7, 129.2, 129.1, 128.8, 128.6, 128.5, 128.4, 128.3, 128.2, 128.1, 128.0, 127.7 (Ph), 101.9 (1''-C), 97.6 (1'-C), 81.3 (3'-C), 80.1 (2'-C), 78.2 (4'-C), 77.2 (1-C or 4-C), 75.7 (C<sub>A</sub>H<sub>2</sub>Ph), 75.3 (C<sub>B</sub>H<sub>2</sub>Ph), 74.6 (1-C or 4-C), 73.9, 73.7 (5''-C and C<sub>C</sub>H<sub>2</sub>Ph), 72.6 (3''-C), 71.9 (2''-C), 70.8 (5'-C), 70.1 (4''-C), 59.8, 59.3 (2-C and 5-C), 51.3, 51.2 (6'-H and 6''-C), 31.6 and 31.3 (3-C and 6-C) (four aromatic peaks overlapped or missing); *m/z* (ES) 1177.5 (55, MNa<sup>+</sup>) and 430.3 (100); (Found: MNa<sup>+</sup>, 1177.4180). C<sub>60</sub>H<sub>58</sub>O<sub>13</sub>N<sub>12</sub> requires *MNa*, 1177.4144).

Also obtained was (*1S,2S,4S,5S*)-1-*O*-(6'-Azido-6'-deoxy-2',3',4'-tri-*O*-benzyl- $\alpha$ -D-glucopyranosyl)-4-*O*-(6''-Azido-6''-deoxy-2'',3'',4''-tri-*O*-benzoyl- $\beta$ -L-glucopyranosyl)-2,5-diazido-cyclohexane-1,4-diol **28'AB'** (12.2 mg, 3%) as a yellow oil, *R*<sub>f</sub> 0.52 (7:3 petrol-EtOAc);  $[\alpha]_D^{25} +70.4$  (c. 1.00 in CHCl<sub>3</sub>);  $\nu_{\max}/\text{cm}^{-1}$  (film) 2917, 2103, 1734, 1259 and 1069;  $\delta_H$  (500 MHz, CDCl<sub>3</sub>) 7.96 (2H, dd, *J* 7.3 and 1.2, Bz), 7.92 (2H, dd, *J* 7.3 and 1.1, Bz), 7.83 (2H, dd, *J* 7.2 and 1.1, Bz), 7.53 (1H, dd, *J* 7.4 and 7.3, Bz), 7.49 (1H, dd, *J* 7.4 and 7.3, Bz), 7.44 (1H, dd, *J* 7.5 and 7.4, Bz), 7.41-7.23 (21H, m, Ph), 5.89 (1H, t, *J* 9.7, 3''-H), 5.50 (1H, dd, *J* 9.7 and 7.9, 2''-H), 5.49 (1H, t, *J* 9.7, 4''-H), 4.95 (1H, d, *J* 7.9, 1''-H), 4.94 (1H, d, *J* 11.4, CH<sub>A</sub>HPh), 4.89 (1H, d, *J* 11.1, CH<sub>B</sub>HPh), 4.79-4.74 (3H, m, CH<sub>H<sub>A</sub></sub>Ph, CH<sub>C</sub>HPh and 1'-H), 4.61 (1H, d, *J* 11.9, CH<sub>H<sub>C</sub></sub>Ph), 4.57 (1H, d, *J* 11.1, CH<sub>H<sub>B</sub></sub>Ph), 4.00 (1H, ddd, *J* 9.7, 7.3 and 2.3, 5''-H), 3.97-3.92 (2H, m, 1-H or 4-H and 2-H or 5-H), 3.89 (1H, t, *J* 9.3, 3'-H), 3.86-3.80 (1H, m, 5'-H), 3.63-3.58 (1H, m, 1-H or 4-H), 3.56 (1H, dd, *J* 13.6 and 7.3, 6''-H<sub>A</sub>), 3.53-3.47 (2H, m, 2'-H and 2-H or 5-H), 3.42 (1H, t, *J* 9.3, 4'-H), 3.40-3.35 (2H, m, 6'-H<sub>A</sub> and 6''-H<sub>B</sub>), 3.28 (1H, dd, *J* 13.1 and 5.1, 6'-H<sub>B</sub>), 1.95-1.82 (3H, m, 3-H and 6-H) and 1.80-1.73 (1H, m, 3-H<sub>B</sub> or 6-H<sub>B</sub>);  $\delta_C$  (125 MHz, CDCl<sub>3</sub>) 165.7, 165.3, 164.9 (C=O), 138.6, 137.9 (*o*-Ph), 133.7, 133.6, 133.4 (*o*-Bz), 129.9, 129.8, 129.7, 128.6, 128.5, 128.4, 128.3, 128.0, 127.9, 127.8, 127.6 (Ph), 100.6 (1''-C), 95.0 (1'-C), 81.5 (3'-C), 79.7 (2'-C), 78.1 (4'-C), 76.3 (1-C or

4-C), 75.7 ( $C_AH_2Ph$ ), 75.0 ( $C_BH_2Ph$ ), 74.3 (5''-C), 73.7 ( $C_C H_2Ph$ ), 73.2 (1-C or 4-C), 72.4 (3''-C), 71.8 (2''-C), 70.6 (5'-C), 70.1 (4''-C), 59.6, 59.4 (2-C and 5-C), 51.3, 51.2 (6'-H and 6''-C), 30.5 and 29.1 (3-C and 6-C) (eight aromatic peaks overlapped or missing);  $m/z$  (ES) 1177.8 (69,  $MNa^+$ ) and 430.2 (100); (Found:  $MNa^+$ , 1177.4167.  $C_{60}H_{58}O_{13}N_{12}$  requires  $MNa$ , 1177.4144).

Also obtained was (1*R*,2*R*,4*R*,5*R*)-1-*O*-(6'-Azido-6'-deoxy-2',3',4'-tri-*O*-benzyl- $\beta$ -D-glucopyranosyl)-4-*O*-(6''-Azido-6''-deoxy-2'',3'',4''-tri-*O*-benzoyl- $\beta$ -L-glucopyranosyl)-2,5-diazido-cyclohexane-1,4-diol **28bB'** (36.3 mg, 9%; 90:10 mixture of diastereomers) as a yellow oil,  $R_f$  0.52 (7:3 petrol-EtOAc);  $[\alpha]_D +5.8$  (c. 1.04 in  $CHCl_3$ );  $\nu_{max}/cm^{-1}$  (film) 2923, 2103, 1733, 1260 and 1070;  $\delta_H$  (500 MHz,  $CDCl_3$ ) 7.98-7.89 (4H, m, Bz), 7.83-7.78 (2H, m, Bz), 7.56-7.20 (24H, m, Ph), 5.88 (1H, t,  $J$  9.7, 3''-H), 5.56-5.47 (2H, m, 2''-H and 4''-H), 5.04 (1H, d,  $J$  7.9, 1''-H), 4.93 (1H, d,  $J$  10.9,  $CH_A HPh$ ), 4.85 (1H, d,  $J$  11.1,  $CH_B HPh$ ), 4.80 (1H, d,  $J$  10.9,  $CHH_A Ph$ ), 4.76 (1H d,  $J$  10.9,  $CH_C HPh$ ), 4.70 (1H, d,  $J$  10.9,  $CHH_C Ph$ ), 4.56 (1H, d,  $J$  11.1,  $CHH_B Ph$ ), 4.44 (1H, d,  $J$  7.7, 1'-H), 4.01-3.95 (2H, m, 5''-H and 2-H or 5-H), 3.87-3.82 (1H, m, 1-H or 4-H), 3.78-3.70 (1H, m, 1-H or 4-H), 3.64-3.58 (1H, m, 3'-H), 3.52-3.46 (3H, m, 2-H or 5-H, 6''-H), 3.46-3.38 (4H, m, 2'-H, 4'-H, 5'-H and 6'- $H_A$ ), 3.27 (1H, dd,  $J$  12.7 and 4.3, 6'- $H_B$ ), 2.28-2.18 (1H, m, 3- $H_A$  or 6- $H_A$ ), 2.15-2.06 (1H, m, 3- $H_B$  or 6- $H_B$ ), 1.97-1.90 (1H, m, 3- $H_A$  or 6- $H_A$ ) and 1.80-1.71 (1H, m, 3- $H_B$  or 6- $H_B$ );  $\delta_C$  (125 MHz,  $CDCl_3$ ) 165.7, 165.3, 165.1 ( $C=O$ ), 138.2, 137.7, 137.6 (*o*-Ph), 133.7, 133.3, 133.2 (OBz), 129.9, 129.7, 128.7, 128.6, 128.5, 128.4, 128.3, 128.1, 127.9, 127.8 (Ph), 102.4, 102.1 (1''-C and 1'-C), 84.5 (3'-C), 81.9 (2'-C), 78.1, 77.9 (4'-C and 1-C or 4-C), 75.7 ( $C_A H_2Ph$ ), 75.3, 75.2, 75.0 ( $C_B H_2Ph$ ,  $C_C H_2Ph$  and 1-C or 4-C), 74.6 (5'-C), 73.7 (5''-C), 72.7 (3''-C), 71.8 (2''-C), 70.0 (4''-C), 60.2, 60.0 (2-C and 5-C), 51.3 (6'-H and 6''-C), 31.8 and 30.2 (3-C and 6-C) (eight aromatic peaks overlapped or missing);  $m/z$  (ES) 1177.5 (57,  $MNa^+$ ), 760.3 (22) and 430.2 (100); (Found:  $MNa^+$ , 1177.4175.  $C_{60}H_{58}O_{13}N_{12}$  requires  $MNa$ , 1177.4144).

**(1*R*,2*R*,4*R*,5*R*)-1-*O*-(6'-Azido-6'-deoxy-2',3',4'-tri-*O*-benzyl- $\alpha$ -D-glucopyranosyl)-4-*O*-(3''-Azido-3''-deoxy-2'',4'',6''-tri-*O*-benzyl- $\alpha$ -D-glucopyranosyl)-2,5-diazido-cyclohexane-1,4-diol **28AC****

By method A, the glycosyl donor **21C** (242 mg, 1.2 eq., 0.43 mmol) and the acceptor **28A** (233 mg, 1.0 eq., 0.36 mmol; *ca.* 70:15:15 **28A** : **28b** : **28'A**) gave a crude mixture which was purified by flash chromatography on silica gel (8:2 petrol–EtOAc) and preparative HPLC to give **28AC** (117.2 mg, 30%) as a yellow oil,  $R_f$  0.43 (8:2 petrol–EtOAc);  $[\alpha]_D +58.0$  (c. 1.00 in  $\text{CHCl}_3$ );  $\nu_{\text{max}}/\text{cm}^{-1}$  (film) 3031, 2924, 2106, 1254 and 1073;  $\delta_{\text{H}}$  (500 MHz,  $\text{CDCl}_3$ ) 7.40–7.25 (30H, m, Ph), 5.00 (1H, d,  $J$  10.9, 3'C- $\text{CH}_A\text{HPh}$ ), 4.91 (1H, d,  $J$  10.9, 2"C- $\text{CH}_B\text{HPh}$ ), 4.89 (2H, br s, 1'-H and 1"-H), 4.82 (1H, d,  $J$  10.9, 3'C- $\text{CHH}_A\text{Ph}$ ), 4.81 (1H, d,  $J$  10.5, 4"C- $\text{CH}_C\text{HPh}$ ), 4.77 (1H, d,  $J$  11.9,  $\text{CH}_D\text{HPh}$ ), 4.74 (1H, d,  $J$  11.8,  $\text{CH}_E\text{HPh}$ ), 4.66 (1H, d,  $J$  11.9,  $\text{CHH}_D\text{Ph}$ ), 4.65 (1H, d,  $J$  11.8,  $\text{CHH}_E\text{Ph}$ ), 4.61 (1H, d,  $J$  12.1, 6"C- $\text{CH}_F\text{HPh}$ ), 4.57 (1H, d,  $J$  10.9, 2"C- $\text{CHH}_B\text{Ph}$ ), 4.47 (1H, d,  $J$  12.1, 6"C- $\text{CHH}_F\text{Ph}$ ), 4.44 (1H, d,  $J$  10.5, 4"C- $\text{CHH}_C\text{Ph}$ ), 3.95 (1H, t,  $J$  9.3, 3'-H), 3.89 (1H, t,  $J$  9.9, 3"-H), 3.85–3.81 (1H, m, 5'-H), 3.81–3.77 (1H, m, 5"-H), 3.72 (1H, dd,  $J$  10.6 and 3.5, 6"- $\text{H}_A$ ), 3.66–3.59 (4H, m, 1-H, 2-H, 4-H and 5-H), 3.60 (1H, dd,  $J$  10.6 and 2.0, 6"- $\text{H}_B$ ), 3.51 (1H, dd,  $J$  9.3 and 3.6, 2'-H), 3.47–3.40 (3H, m, 4'-H, 4"-H and 6'- $\text{H}_A$ ), 3.37 (1H, dd,  $J$  10.0 and 3.6, 2"-H), 3.32 (1H, dd,  $J$  13.1 and 5.7, 6'- $\text{H}_B$ ), 2.07–1.98 (2H, m, 3- $\text{H}_A$  and 6- $\text{H}_A$ ) and 1.95–1.84 (2H, m, 3- $\text{H}_B$  and 6- $\text{H}_B$ );  $\delta_{\text{C}}$  (125 MHz,  $\text{CDCl}_3$ ) 138.6, 138.1, 137.8, 137.7, 136.6, 137.5 (*o*-Ph), 128.6, 128.5, 128.4, 128.3, 128.2, 128.1, 128.0, 127.9, 127.7 (Ph), 97.7, 97.2 (1'-C and 1"-C), 81.4 (3'-C), 79.9 (2'-C), 78.3 (4'-C), 77.8 (2"-C), 76.3 (4"-C), 75.7 ( $\text{C}_A\text{H}_2\text{Ph}$ ), 75.3, 75.1, 74.8 ( $\text{C}_B\text{H}_2\text{Ph}$ , 1-C, 4-C and  $\text{C}_C\text{H}_2\text{Ph}$ ), 73.7, 73.5, 73.4 ( $\text{C}_D\text{H}_2\text{Ph}$ ,  $\text{C}_E\text{H}_2\text{Ph}$  and  $\text{C}_F\text{H}_2\text{Ph}$ ), 70.9, 70.8 (5'-C and 5"-C), 68.1 (6"-C), 65.2 (3"-C), 59.5 (2-C and 5-C), 51.4 (6'-H), 31.3 and 31.3 (3-C and 6-C) (nine aromatic peaks overlapped or missing);  $m/z$  (ES) 1135.5 (38,  $\text{MNa}^+$ ) and 430.2 (100); (Found:  $\text{MNa}^+$ , 1135.4814.  $\text{C}_{60}\text{H}_{64}\text{O}_{10}\text{N}_{12}$  requires  $\text{MNa}$ , 1135.4766).

Also obtained was (*1S,2S,4S,5S*)-1-*O*-(6'-Azido-6'-deoxy-2',3',4'-tri-*O*-benzyl- $\alpha$ -D-glucopyranosyl)-4-*O*-(3''-Azido-3''-deoxy-2'',4'',6''-tri-*O*-benzyl- $\alpha$ -D-glucopyranosyl)-2,5-diazido-cyclohexane-1,4-diol **28'AC** (15.3 mg, 4%; 90:10 mixture of diastereomers) as a yellow oil,  $R_f$  0.43 (8:2 petrol–EtOAc);  $[\alpha]_D +60.8$  (c. 1.00 in  $\text{CHCl}_3$ );  $\nu_{\text{max}}/\text{cm}^{-1}$  (film) 2924, 2105, 1255 and 1073;  $\delta_{\text{H}}$  (500 MHz,  $\text{CDCl}_3$ ) 7.40–7.20 (30H, m, Ph), 5.00 (1H, d,  $J$  10.9,  $\text{CH}_A\text{HPh}$ ), 4.92 (1H, d,  $J$  11.1,  $\text{CH}_B\text{HPh}$ ), 4.84 (1H, d,  $J$  9.9,  $\text{CH}_C\text{HPh}$ ), 4.82 (1H, d,  $J$  10.9,  $\text{CHH}_A\text{Ph}$ ), 4.81 (1H, d,  $J$  12.0,  $\text{CH}_D\text{HPh}$ ), 4.78 (1H, d,  $J$  12.0,  $\text{CH}_E\text{HPh}$ ), 4.77 (2H, d,  $J$  2.7,

1'-H and 1''-H), 4.65-4.57 (4H, m,  $CHH_B$ -Ph,  $CHH_C$ -Ph,  $CHH_E$ -Ph and  $CH_F$ HPh), 4.48-4.43 (2H, m,  $CHH_C$ -Ph and  $CHH_F$ -Ph), 3.97 (1H, t,  $J$  9.3, 3'-H), 3.90 (1H, t,  $J$  10.0, 3''-H), 3.89-3.84 (1H, m, 5'-H), 3.83-3.76 (2H, m, 1-H or 4-H and 2-H and 5-H), 3.73 (1H, dd,  $J$  10.7 and 3.5, 6''-H<sub>A</sub>), 3.71-3.65 (2H, m, 1-H or 4-H and 2-H or 5-H), 3.63 (1H, dd,  $J$  10.7 and 1.9, 6''-H<sub>B</sub>), 3.61-3.55 (1H, m, 5''-H), 3.53 (1H, m, 2'-H), 3.50-3.42 (3H, m, 4'-H, 4''-H, 6'-H<sub>A</sub>), 3.39 (1H, m, 2''-H), 3.33 (1H, dd,  $J$  13.2 and 5.5, 6'-H<sub>B</sub>), 1.95-1.88 (2H, m, 3-H<sub>A</sub> and 6-H<sub>A</sub>) and 1.84-1.76 (2H, m, 3-H<sub>B</sub> and 6-H<sub>B</sub>);  $\delta_C$  (125 MHz, CDCl<sub>3</sub>) 138.4, 137.9 (*o*-Ph), 128.9, 128.4, 128.3, 128.1, 127.9, 127.8 (Ph), 96.1, 94.1 (1'-C and 1''-C), 81.5 (3'-C), 79.6 (2'-C), 78.2 (4'-C), 77.9 (2''-C), 76.2 (4''-C), 75.7 ( $C_A$ H<sub>2</sub>Ph), 75.3 ( $C_C$ H<sub>2</sub>Ph), 75.1 ( $C_B$ H<sub>2</sub>Ph), 74.8, 74.1, 73.8 ( $C_D$ H<sub>2</sub>Ph,  $C_E$ H<sub>2</sub>Ph and  $C_F$ H<sub>2</sub>Ph), 73.4 (1-C and 4-C), 70.7 (5'-C), 68.5 (5''-C), 68.3 (6''-C), 65.2 (3''-C), 59.7 (2-C and 5-C), 51.4 (6'-H), 29.7 and 29.4 (3-C and 6-C) (sixteen aromatic peaks overlapped or missing);  $m/z$  (ES) 1135.5 (30, MNa<sup>+</sup>), 955.4 (25) and 430.2 (100); (Found: MNa<sup>+</sup>, 1135.4783. C<sub>60</sub>H<sub>64</sub>O<sub>10</sub>N<sub>12</sub> requires MNa, 1135.4766).

Also obtained was (*1R,2R,4R,5R*)-1-*O*-(6'-Azido-6'-deoxy-2',3',4'-tri-*O*-benzyl- $\beta$ -D-glucopyranosyl)-4-*O*-(3''-Azido-3''-deoxy-2'',4'',6''-tri-*O*-benzyl- $\alpha$ -D-glucopyranosyl)-2,5-diazido-cyclohexane-1,4-diol **28bC** (29.7 mg, 8%; *ca.* 90:10 mixture of diastereomers) as a yellow oil,  $R_f$  0.43 (8:2 petrol-EtOAc);  $[\alpha]_D$  +24.0 (c. 1.00 in CHCl<sub>3</sub>);  $\nu_{max}/cm^{-1}$  (film) 3031, 2920, 2105, 1255 and 1072;  $\delta_H$  (500 MHz, CDCl<sub>3</sub>) 7.45-7.25 (30H, m, Ph), 4.99 (1H, d,  $J$  3.4, 1''-H), 4.94 (1H, d,  $J$  10.9), 4.86 (1H, d,  $J$  11.8), 4.85 (1H, d,  $J$  10.9), 4.81 (1H, d,  $J$  10.9), 4.79 (1H, d,  $J$  10.5), 4.75 (1H, d,  $J$  10.9), 4.73-4.72 (2H, m), 4.62 (1H, d,  $J$  12.1), 4.57 (1H, d,  $J$  11.8), 4.49 (1H, d,  $J$  7.7, 1'-H), 4.46 (1H, d,  $J$  12.1), 4.41 (1H, d,  $J$  10.5), 3.92-3.82 (3H, m, 3'-H, 1-H or 4-H and 2-H or 5-H), 3.82-3.76 (1H, m, 5'-H), 3.70 (1H, dd,  $J$  10.6 and 3.5, 6''-H<sub>A</sub>), 3.66-3.62 (1H, m, 3''-H), 3.62-3.56 (3H, m, 6''-H<sub>B</sub>, 1-H or 4-H and 2-H or 5-H), 3.50-3.40 (5H, m, 2'-H, 5''-H, 4'-H, 4''-H and 6'-H<sub>A</sub>), 3.37 (1H, dd,  $J$  10.0 and 3.4, 2''-H), 3.27 (1H, dd,  $J$  12.3 and 5.0, 6'-H<sub>B</sub>), 2.06-1.90 (3H, m, 3-H and 6-H) and 1.86-1.78 (1H, m, 3-H or 6-H);  $\delta_C$  (125 MHz, CDCl<sub>3</sub>) 137.8, 137.7, 137.5 (*o*-Ph), 128.2, 128.1, 128.0, 127.9, 127.6, 127.5 (Ph), 102.5 (1'-C), 97.5 (1''-C), 84.4 (3'-C), 82.1 (2'-C), 78.1 (4'-C), 77.7 (2''-C), 76.3 (4''-C and 1-C or 4-C), 75.3 ( $C_A$ H<sub>2</sub>Ph,  $C_B$ H<sub>2</sub>Ph,  $C_C$ H<sub>2</sub>Ph,  $C_D$ H<sub>2</sub>Ph and 1-C or 4-C), 74.7 (5''-C), 73.6 ( $C_F$ H<sub>2</sub>Ph), 72.9 ( $C_E$ H<sub>2</sub>Ph), 70.6 (5'-C), 68.2 (6''-C), 65.3 (3''-C), 59.8 (2-C and 5-C), 51.3 (6'-

H), 31.5 and 30.6 (3-C and 6-C) (15 aromatic peaks overlapped or missing);  $m/z$  (ES) 1135.6 (100,  $MNa^+$ ), 575.1 (27) and 430.2 (98); (Found:  $MNa^+$ , 1135.4783.  $C_{60}H_{64}O_{10}N_{12}$  requires  $MNa$ , 1135.4766).

Also obtained was (1*R*,2*R*,4*R*,5*R*)-1-*O*-(6'-Azido-6'-deoxy-2',3',4'-tri-*O*-benzyl- $\alpha$ -D-glucopyranosyl)-4-*O*-(3''-Azido-3''-deoxy-2'',4'',6''-tri-*O*-benzyl- $\beta$ -D-glucopyranosyl)-2,5-diazido-cyclohexane-1,4-diol **28Ad** (42.4 mg, 11%) as a yellow oil,  $R_f$  0.43 (8:2 petrol-EtOAc);  $[\alpha]_D +4.00$  (c. 1.00 in  $CHCl_3$ );  $\nu_{max}/cm^{-1}$  (film) 2918, 2104, 1256 and 1072;  $\delta_H$  (500 MHz,  $CDCl_3$ ) 7.45-7.25 (30H, m, Ph), 5.03 (1H, d,  $J$  3.5, 1'-H), 5.00 (1H, d,  $J$  10.9, 3'-C- $CH_A$ HPh), 4.91 (1H, d,  $J$  10.9, 4'-C- $CH_B$ HPh), 4.85 (1H, d,  $J$  10.8,  $CH_C$ HPh), 4.81 (1H, d,  $J$  10.6, 4''-C- $CH_D$ HPh), 4.80 (1H, d,  $J$  10.9, 3'-C- $CHH_A$ Ph), 4.77 (1H, d,  $J$  10.8,  $CHH_C$ Ph), 4.75 (2H, d,  $J$  11.8,  $CH_E$ HPh), 4.59 (1H, d,  $J$  12.0, 6''-C- $CH_F$ HPh), 4.57 (1H, d,  $J$  10.9, 4'-C- $CHH_B$ Ph), 4.55 (1H, d,  $J$  10.6, 4''-C- $CHH_D$ Ph), 4.54 (1H, d,  $J$  12.0, 6''-C- $CHH_F$ Ph), 4.60 (1H, d,  $J$  7.7, 1''-H), 4.00-3.94 (2H, m, 3'-H and 2-H or 5-H), 3.91-3.84 (2H, m, 5'-H and 1-H or 4-H), 3.69-3.63 (4H, m, 2-H or 5-H, 1-H or 4-H and 6''-H), 3.56 (1H, dd,  $J$  9.7 and 3.6, 2'-H), 3.55 (1H, t,  $J$  9.5, 3''-H), 3.48-3.41 (4H, m, 4'-H, 4''-H, 6'- $H_A$  and 5''-H), 3.33 (1H, dd,  $J$  10.6 and 5.8, 6'- $H_B$ ), 3.28 (1H, dd,  $J$  9.7 and 7.7, 2''-H), 2.12-2.00 (3H, m, 3-H and 6-H) and 1.87-1.79 (1H, m, 3- $H_B$  or 6- $H_B$ );  $\delta_C$  (125 MHz,  $CDCl_3$ ) 138.4, 137.4 (*o*-Ph), 128.4, 128.3, 128.2, 128.1, 128.0, 127.9 (Ph), 102.5 (1''-C), 98.0 (1'-C), 81.5 (3'-C), 80.1 (2'-C and 2''-C), 78.3 (4'-C), 76.1 (1-C or 4-C), 76.1 (4''-C,  $C_AH_2$ Ph and  $C_DH_2$ Ph), 75.3 (1-C or 4-C,  $C_BH_2$ Ph, and  $C_CH_2$ Ph), 73.4 ( $C_FH_2$ Ph), 73.1 ( $C_EH_2$ Ph), 70.9 (5'-C), 68.7 (5''-C), 68.6 (6''-C), 68.5 (3''-C), 60.0 (2-C and 5-C), 51.6 (6'-H), 30.8 and 30.2 (3-C and 6-C) (16 aromatic peaks overlapped or missing);  $m/z$  (ES) 1135.6 (100,  $MNa^+$ ), 575.1 (27) and 430.2 (98); (Found:  $MNa^+$ , 1135.4782.  $C_{60}H_{64}O_{10}N_{12}$  requires  $MNa$ , 1135.4766).

**(1*R*,2*R*,4*R*,5*R*)-1-*O*-(6'-Azido-6'-deoxy-2',3',4'-tri-*O*-benzyl- $\alpha$ -D-glucopyranosyl)-4-*O*-(3''-Azido-3''-deoxy-2'',4'',6''-tri-*O*-acetoxy- $\beta$ -D-glucopyranosyl)-2,5-diazido-cyclohexane-1,4-diol **28AD****

By method A, the glycosyl donor **21D** (181 mg, 1.2 eq., 0.43 mmol) and the acceptor **28A** (233 mg, 1.0 eq., 0.36 mmol; *ca.* 70:15:15 **28A** : **28b** : **28'A**) gave a crude product which

was purified by flash chromatography on silica gel (gradient elution: 9:1 → 7:3 petrol–EtOAc) and preparative HPLC to give **28AD** (29.0 mg, 8%) as a yellow oil,  $R_f$  0.10 (8:2 petrol–EtOAc);  $[\alpha]_D^{20} +13.7$  ( $c$  0.99 in  $\text{CHCl}_3$ );  $\nu_{\text{max}}/\text{cm}^{-1}$  (film) 2929, 2106, 1752, 1218 and 1040;  $\delta_{\text{H}}$  (500 MHz,  $\text{CDCl}_3$ ) 7.40–7.25 (15H, m, Ph), 5.01–4.99 (1H, m, 1'-H), 4.98 (1H, dd,  $J$  10.2 and 9.5, 4''-H), 4.97 (1H, d,  $J$  10.9,  $\text{CH}_A\text{HPh}$ ), 4.91 (1H, dd,  $J$  11.1,  $\text{CH}_B\text{HPh}$ ), 4.90 (1H, dd,  $J$  10.2 and 7.9, 2''-H), 4.82 (1H, d,  $J$  10.9,  $\text{CH}_A\text{HPh}$ ), 4.75 (1H, d,  $J$  11.8,  $\text{CH}_C\text{HPh}$ ), 4.71 (1H, d,  $J$  11.8,  $\text{CH}_C\text{HPh}$ ), 4.57 (1H, dd,  $J$  11.1,  $\text{CH}_B\text{HPh}$ ), 4.56 (1H, dd,  $J$  7.9, 1''-H), 4.20 (1H, dd,  $J$  12.6 and 5.1, 6''-H<sub>A</sub>), 4.15 (1H, dd,  $J$  12.6 and 2.6, 6''-H<sub>B</sub>), 3.96 (1H, t,  $J$  9.3, 3'-H), 3.89–3.82 (2H, m, 5'-H and 2-H or 5-H), 3.80–3.75 (1H, m, 1-H or 4-H), 3.70–3.63 (1H, m, 5''-H), 3.63 (1H, t,  $J$  10.2, 3''-H), 3.63–3.60 (1H, m, 1-H or 4-H), 3.60–3.55 (1H, m, 2-H or 5-H), 3.53 (1H, dd,  $J$  9.3 and 3.6, 2'-H), 3.50–3.40 (2H, m, 4'-H and 6'-H<sub>A</sub>), 3.34 (1H, dd,  $J$  13.1 and 5.7, 6'-H<sub>B</sub>), 2.17 (3H, s, Me), 2.12 (6H, s, Me), 2.06–1.94 (3H, m, 3-H and 6-H) and 1.83–1.76 (1H, m, 3-H<sub>B</sub> or 6-H<sub>B</sub>);  $\delta_{\text{C}}$  (125 MHz,  $\text{CDCl}_3$ ) 138.6, 138.1, 137.8 (*o*-Ph), 128.5, 128.3, 128.0, 127.9, 127.5 (Ph), 100.3 (1''-C), 97.8 (1'-C), 81.3 (3'-C), 80.1 (2'-C), 78.1 (4'-C), 75.8, 75.6 (1-C and 4-C), 75.5 ( $\text{C}_A\text{H}_2\text{Ph}$ ), 75.1 ( $\text{C}_B\text{H}_2\text{Ph}$ ), 73.1 ( $\text{C}_C\text{H}_2\text{Ph}$ ), 72.8 (5''-C), 71.1 (2''-C), 70.9 (5'-C), 68.5 (4''-C), 64.2 (3''-C), 61.9 (6''-C), 59.8 (2-C and 5-C), 51.3 (6'-H), 30.7, 30.4 (3-C and 6-C), 20.6 and 20.5 (Me) (7 peaks overlapped or missing);  $m/z$  (ES) 991.7 (100,  $\text{MNa}^+$ ) and 430.3 (82); (Found:  $\text{MNa}^+$ , 991.3668.  $\text{C}_{45}\text{H}_{52}\text{O}_{13}\text{N}_{12}$  requires  $\text{MNa}$ , 991.3675).

**(1S,3S,4S,6S)-1-O-(6'-Azido-6'-deoxy-2',3',4'-tri-O-benzyl- $\alpha$ -D-glucopyranosyl)-4,6-diazido-cyclohexane-1,3-diol 29A**

By method B, the glycosyl donor **21A** (551 mg, 1.0 eq., 0.97 mmol) and the acceptor **15** (192 mg, 1.0 eq., 0.97 mmol) gave a crude product, which was purified by flash chromatography (gradient elution 9:1 → 7:3 petrol–EtOAc) to give the *glycosidated product* **29A** (179.6 mg, 29%) as a colourless oil,  $R_f$  0.15 (7:3 petrol–EtOAc);  $[\alpha]_D^{20} +54.3$  ( $c$  2.07 in  $\text{CH}_2\text{Cl}_2$ );  $\nu_{\text{max}}/\text{cm}^{-1}$  (thin film) 3445, 3031, 2928 and 2105;  $\delta_{\text{H}}$  (500 MHz;  $\text{CDCl}_3$ ) 7.49–7.23 (15H, m, PhH), 4.97 (1H, d,  $^2J$  10.8,  $\text{CH}_2\text{Ph}$ ), 4.90 (1H, d,  $^2J$  10.9,  $\text{CH}_2\text{Ph}$ ), 4.85 (1H, d,  $J$  3.6, 1'-H), 4.82 (1H, d,  $^2J$  10.8,  $\text{CH}_2\text{Ph}$ ), 4.77 (1H, d,  $^2J$  11.6,  $\text{CH}_2\text{Ph}$ ), 4.59 (1H, d,  $^2J$  10.9,  $\text{CH}_2\text{Ph}$ ), 4.57

(1H, d,  $^2J$  11.6,  $CH_2Ph$ ), 3.91 (1H, t,  $J$  9.3, 3'-H), 3.84-3.42 (9H, m, 1-H, 3-H, 4-H, 6-H, 6'-H, 5'-H, 4'-H and 2'-H) and 2.13-1.70 (4H, m, 5-H<sub>2</sub> and 2-H<sub>2</sub>);  $\delta_C$  (75 MHz,  $CDCl_3$ ) 138.9, 138.4, 138.2, 130.4, 129.4, 129.1, 129.0, 128.8, 128.6, 128.5, 128.4, 128.2, 95.7, 81.9, 80.3, 78.7, 78.6, 76.2, 75.7, 74.1, 71.4, 69.1, 62.1, 51.7, 32.2 and 30.0 (1 carbon signal missing or overlapped);  $m/z$  (ES) 674 (100%,  $MNH_4^+$ ) and 679 (40,  $MNa^+$ ); (Found:  $MNa^+$  678.2741;  $C_{33}H_{37}N_9O_6$  requires  $MNa$  678.2765).

**(1R,3R,4R,6R)-1-O-(6'-Azido-6'-deoxy-2',3',4'-tri-O-benzyl- $\alpha$ -D-glucopyranosyl)-4,6-diazido-cyclohexane-1,3-diol 29'A**

By method B, the diol **15'** (1.07 g, 5.39 mmol) and the donor **21A** (2.55 g, 4.49 mmol) gave a crude product, which was pre-absorbed onto silica and purified by flash chromatography (gradient elution 9:1  $\rightarrow$  6:4 petrol–EtOAc) to give the *glycosidated product* **29'A** (429.4 mg, 15%) as a colourless oil,  $R_f$  0.15 (8:2 petrol–EtOAc);  $[\alpha]_D^{20} + 28.1$  ( $c$  2.05 in  $CH_2Cl_2$ );  $\nu_{max}/cm^{-1}$  (thin film) 3448, 3031, 2927 and 2103;  $\delta_H$  (500 MHz;  $CDCl_3$ ) 7.37-7.24 (15H, m, PhH), 4.97 (1H, d,  $^2J$  10.9,  $CH_2Ph$ ), 4.90 (1H, d,  $^2J$  11.0,  $CH_2Ph$ ), 4.83 (1H, d,  $J$  3.6, 1'-H), 4.81 (1H, d,  $^2J$  10.9,  $CH_2Ph$ ), 4.78 (1H, d,  $^2J$  11.7,  $CH_2Ph$ ), 4.61 (1H,  $^2J$  11.7,  $CH_2Ph$ ), 4.57 (1H,  $^2J$  11.0,  $CH_2Ph$ ), 3.90 (1H, t,  $J$  9.2, 3'-H), 3.86-3.82 (2H, m, 4'-H and 1-H), 3.81-3.74 (2H, m, 5'-H and 3-H), 3.59 (1H, dd,  $J$  9.2 and 4.7, 6-H), 3.54-3.50 (2H, m, 2'-H and 4-H), 3.44 (1H, dd,  $^2J$  13.1 and  $J$  5.5, 6'-H), 3.31 (1H, dd,  $^2J$  13.1 and  $J$  5.9, 6'-H), 2.13 (1H, br s, OH), 2.01-1.95 (3H, m, 2-H<sub>a</sub> and 5-H<sub>2</sub>) and 1.87 (1H, m, 2-H<sub>b</sub>);  $\delta_C$  (75 MHz,  $CDCl_3$ ) 138.4, 138.1, 137.6, 128.6, 128.5, 128.5, 128.4, 128.2, 128.1, 128.0, 127.9, 127.7, 97.4, 81.4, 80.2, 78.2, 75.7, 75.3, 75.1, 73.8, 70.9, 69.0, 61.5, 58.8, 51.3, 34.0 and 29.2;  $m/z$  (ES) 679 (100%,  $MNa^+$ ); (Found:  $MNa^+$  678.2739;  $C_{33}H_{37}N_9O_6$  requires  $MNa$ , 678.2765).

Also obtained (1R,3R,4R,6R)-1,3-O-(6'-Azido-6'-deoxy-2',3',4'-tri-O-benzyl- $\alpha$ -D-glucopyranosyl)-4,6-diazido-cyclohexane-1,3-diol **29'AA** (73.7 mg, 2%) as a colourless amorphous solid,  $R_f$  0.20 (8:2 petrol–Et<sub>2</sub>O);  $[\alpha]_D^{20} + 49.3$  ( $c$  2.02 in  $CH_2Cl_2$ );  $\nu_{max}/cm^{-1}$  (thin film) 3064, 3031, 2917 and 2102;  $\delta_H$  (500 MHz;  $CDCl_3$ ) 7.34-7.24 (30H, m, PhH), 4.98 (2H, d,  $^2J$  10.9,  $CH_2Ph$ ), 4.93 (2H, d,  $^2J$  3.6, 1'-H), 4.89 (2H, d,  $^2J$  11.0,  $CH_2Ph$ ), 4.81 (2H, d,  $^2J$  10.9,  $CH_2Ph$ ), 4.77 (2H, d,  $^2J$  11.7,  $CH_2Ph$ ), 4.67 (2H, d,  $^2J$  11.7,  $CH_2Ph$ ), 4.57 (2H,  $^2J$  11.0,

$CH_2Ph$ ), 3.94 (2H, t,  $J$  9.1, 3'-H), 3.85-3.82 (2H, m, 5'-H), 3.72 (2H, app. q,  $J$  5.9, 1-H and 3-H), 3.58 (2H, app. q,  $J$  5.9, 6-H and 4-H), 3.52 (2H, dd,  $J$  9.1 and 3.6, 2'-H), 3.44 (2H, t,  $J$  9.1, 4-H), 3.42 (2H, dd,  $^2J$  13.1 and  $J$  4.9, 6'<sub>a</sub>-H), 3.29 (2H, dd,  $^2J$  13.1 and  $J$  5.5, 6'<sub>b</sub>-H), 2.01 (2H, app. t,  $J$  5.9, 2-H) and 1.96 (2H, app. t,  $J$  5.9, 5-H);  $\delta_C$  (75 MHz,  $CDCl_3$ ) 139.0, 138.5, 138.3, 129.0, 128.9, 128.8, 128.6, 128.5, 128.4, 128.3, 128.1, 98.0, 81.9, 80.5, 78.6, 76.1, 75.7, 74.0, 71.5, 59.5, 51.8, 33.5 and 29.9 (2 carbon missing or overlapped);  $m/z$  (ES) 1135 (100%,  $MNH_4^+$ ); (Found:  $MNa^+$  1135.4719;  $C_{60}H_{64}N_{12}O_{10}$  requires  $MNa$ , 1135.4766).

Also obtained (1*R*,3*R*,4*R*,6*R*)-1-*O*-(6'-Azido-6'-deoxy-2',3',4'-tri-*O*-benzyl- $\alpha$ -D-glucopyranosyl)-3-*O*-(6''-Azido-6''-deoxy-2'',3'',4''-tri-*O*-benzyl- $\beta$ -D-glucopyranosyl)-4,6-diazido-cyclohexane-1,3-diol **29'Ab** (42.5 mg, 1%) as a colourless amorphous solid,  $R_f$  0.20 (8:2 petrol-Et<sub>2</sub>O);  $[\alpha]_D^{20} + 28.2$  ( $c$  2.13 in  $CH_2Cl_2$ );  $\nu_{max}/cm^{-1}$  (thin film) 3064, 3031, 2917 and 2102;  $\delta_H$  (500 MHz;  $CDCl_3$ ) 7.33-7.25 (30H, m, Ph), 4.96 (1H, d,  $^2J$  10.7,  $CH_2Ph$ ), 4.90 (1H, d,  $^2J$  11.1,  $CH_2Ph$ ), 4.88 (1H, d,  $^2J$  10.7,  $CH_2Ph$ ), 4.87 (1H, d,  $^2J$  10.7,  $CH_2Ph$ ), 4.85 (1H, d,  $^2J$  11.1,  $CH_2Ph$ ), 4.83 (1H, d,  $J$  3.6, 1'-H), 4.78 (1H,  $^2J$  10.7,  $CH_2Ph$ ), 4.77 (1H, d,  $^2J$  10.7,  $CH_2Ph$ ), 4.73 (1H, d,  $^2J$  11.4,  $CH_2Ph$ ), 4.62 (1H, d,  $^2J$  11.4,  $CH_2Ph$ ), 4.59 (1H, d,  $^2J$  11.4,  $CH_2Ph$ ), 4.56 (1H, d,  $^2J$  11.4,  $CH_2Ph$ ), 4.55 (1H, d,  $^2J$  10.7,  $CH_2Ph$ ), 4.54 (1H, d,  $J$  7.7, 1''-H), 4.02-3.99 (1H, m, 1-H or 3-H), 3.94 (2H, t,  $J$  9.3, 3''-H and 3'-H), 3.87-3.81 (3H, m, 3-H or 1-H, 5''-H and 5'-H), 3.67-3.62 (4H, m, 6-H, 4-H, 4''-H and 4'-H), 3.47-3.38 (4H, m, 2'-H, 2''-H, 6<sub>a</sub>''-H and 6<sub>b</sub>''-H, or 6<sub>a</sub>'-H and 6<sub>b</sub>'-H), 3.36 (1H, dd,  $^2J$  13.1 and  $J$  2.2, 6<sub>a</sub>''-H or 6<sub>a</sub>'-H), 3.26 (1H, dd,  $^2J$  13.1 and  $J$  5.6, 6<sub>b</sub>''-H or 6<sub>b</sub>'-H), 2.16-2.12 (1H, m, 2-H<sub>a</sub>), 2.06-2.02 (1H, m, 2-H<sub>b</sub>) and 1.98-1.90 (2H, m, 5-H<sub>2</sub>);  $\delta_C$  (75 MHz,  $CDCl_3$ ) 139.0, 138.7, 138.6, 138.5, 138.3, 138.1, 129.0, 128.8, 128.6, 128.5, 128.4, 128.4, 128.3, 128.2, 128.1, 101.8, 98.6, 84.8, 82.4, 81.7, 80.5, 78.6, 78.4, 76.2, 76.0, 75.7, 75.6, 75.4, 75.0, 73.5, 71.3, 60.2, 59.7, 52.0, 51.6, 31.7 and 30.2 (11 signals missing or overlapped);  $m/z$  (ES) 1131 (100%,  $MNH_4^+$ ); (Found:  $MNH_4^+$  1130.5013;  $C_{60}H_{64}N_{12}O_{10}$  requires  $MNH_4^+$ , 1130.5212).

**(1*R*,2*R*,4*R*,5*R*)-1-*O*-(6'-Azido-6'-deoxy-2',3',4'-tri-*O*-benzoyl- $\beta$ -D-glucopyranosyl)-2,4-diazido-cyclohexane-1,5-diol **29'B****



By method A, the diol **15'** (313 mg, 1.58 mmol) and the donor **21B** (481.8 mg, 0.79 mmol) gave a crude product, which was pre-absorbed onto silica and purified by flash chromatography (gradient elution 9:1 → 7:3 petrol–EtOAc) and then by LC-MS to give the *glycosidated product* **29'B** (46.8 mg, 8%) as a yellow oil,  $R_f$  0.10 (7:3 petrol–EtOAc);  $[\alpha]_D^{20} -41.7$  ( $c$  1.17 in  $\text{CH}_2\text{Cl}_2$ );  $\nu_{\text{max}}/\text{cm}^{-1}$  (thin film) 3496, 2925, 2103, 1733 and 1601;  $\delta_{\text{H}}$  (500 MHz;  $\text{CDCl}_3$ ) 7.95 (2H, d,  $J$  7.2, Ph), 7.91 (2H, d,  $J$  7.4, Ph), 7.82 (2H, d,  $J$  7.3, Ph), 7.53 (2H, dd,  $J$  7.4 and 6.6, Ph), 7.45–7.35 (4H, m, Ph), 7.30–7.24 (2H, m, Ph), 7.18–7.14 (1H, m, Ph), 5.89 (1H, t,  $J$  8.1, 3'-H), 5.49 (1H, t,  $J$  8.1, 4'-H or 2'-H), 5.47 (1H, t,  $J$  8.1, 4'-H or 2'-H), 4.93 (1H, d,  $J$  8.1, 1'-H), 4.03–3.98 (4H, m, 5'-H, 5-H, 1-H and OH), 3.56 (1H, dd,  $^2J$  13.7 and  $J$  7.7, 6'-a-H), 3.42–3.38 (2H, m, 4-H and 2-H), 3.34 (1H, dd,  $^2J$  13.7 and  $J$  2.3, 6'-a-H), 2.01 (1H, dt,  $J$  13.9 and 3.7, 6a-H), 1.90–1.84 (2H, m, 6b-H and 3a-H) and 1.72–1.64 (1H, m, 3b-H);  $\delta_{\text{C}}$  (75 MHz,  $\text{CDCl}_3$ ) 165.7, 165.3, 165.0, 133.8, 133.6, 133.4, 129.9, 129.8, 129.7, 128.9, 128.7, 128.6, 128.5, 128.4, 128.2, 100.1, 75.6, 74.3, 72.2, 71.7, 70.3, 68.8, 61.7, 59.4, 51.2, 32.3 and 29.2;  $m/z$  (ES) 715 (100%,  $\text{MNH}_4^+$ ); (Found:  $\text{MNH}_4^+$  715.2588;  $\text{C}_{33}\text{H}_{31}\text{N}_9\text{O}_9$  requires  $\text{MNH}_4$ , 715.2556).

**(1R,3R,4R,6R)-1-O-(2'-Phthalimido-2'-deoxy-3',4',6'-tri-O-benzyl-β-D-glucopyranosyl)-4,6-diazido-cyclohexane-1,3-diol 29'F**

By method A, the diol **15'** (33 mg, 0.17 mmol), the donor **21F** (128 mg, 0.19 mmol) gave a crude product, which was pre-absorbed onto silica and purified by flash chromatography eluting with 7:3 petrol–EtOAc to give the *glycosidated product* **29'F** (65 mg, 45%) as a yellow oil,  $R_f$  0.15 (7:3 petrol–EtOAc);  $[\alpha]_D^{20} -9.6$  ( $c$  1.8 in  $\text{CH}_2\text{Cl}_2$ );  $\nu_{\text{max}}/\text{cm}^{-1}$  (thin film) 3468, 2930, 2102, 1775 and 1712;  $\delta_{\text{H}}$  (500 MHz;  $\text{CDCl}_3$ ) 7.77–7.59 (2H, m, phthal-H), 7.39–7.22 (12H, m, phthal-H and Ph), 7.01–6.95 (2H, m, Ph), 6.91–6.81 (3H, m, Ph), 5.23 (1H, d,  $J$  8.4, 1'-H), 4.84 (1H, d,  $^2J$  10.8,  $\text{CHPh}$ ), 4.79 (1H, d,  $^2J$  12.1,  $\text{CHPh}$ ), 4.64 (1H, d,  $^2J$  10.8,  $\text{CHPh}$ ), 4.62 (1H, d,  $^2J$  12.1,  $\text{CHPh}$ ), 4.60 (1H, d,  $^2J$  12.1,  $\text{CHPh}$ ), 4.44 (1H, d,  $^2J$  12.1,  $\text{CHPh}$ ), 4.32 (1H, dd,  $J$  10.7 and 8.7, 3'-H), 4.14 (1H, dd,  $J$  10.7 and 8.4, 2'-H), 3.92–3.83 (2H, m, 6'-H<sub>a</sub> and 1-H), 3.78–3.71 (3H, m, 4'-H, 5'-H and 3-H), 3.64 (1H, dd,  $^2J$  9.9 and  $J$  3.7, 6'-H<sub>b</sub>), 3.31 (1H, app td,  $J$  10.9 and 4.1, 4-H), 3.21 (1H, app td,  $J$  9.9 and 4.1, 6-H), 2.10

(1H, br s, OH), 1.93-1.86 (1H, m, 5-H<sub>a</sub>), 1.74 (1H, app dd, *J* 10.5 and 4.1, 5-H<sub>b</sub>), 1.71-1.62 (1H, m, 2-H<sub>a</sub>) and 1.61-1.49 (1H, m, 2-H<sub>b</sub>);  $\delta_{\text{C}}$  (75 MHz, CDCl<sub>3</sub>) 138.3, 134.4, 131.7, 128.9, 128.5, 128.4, 128.2, 127.8, 123.8, 97.6, 79.9, 75.5, 75.4, 73.9, 69.1, 68.9, 62.0, 59.8, 56.3, 35.6, 32.7, 29.4 and 29.3 (seven carbon signals missing or overlapped); *m/z* (ES) 778 (100%, MNH<sub>4</sub><sup>+</sup>); (Found: MNH<sub>4</sub><sup>+</sup> 777.3376; C<sub>41</sub>H<sub>41</sub>N<sub>7</sub>O<sub>8</sub> requires MNH<sub>4</sub>, 777.3360).

**(1S,3S,4S,6S)-1-O-(2',6'-Azido-2',6'-deoxy-3',4'-di-O-benzyl- $\alpha$ -D-glucopyranosyl)-4,6-diazido-cyclohexane-1,3-diol 29G**

By Method B, the acceptor **15** (113 mg, 0.57 mmol) and the donor **21G** (191.2 mg, 0.381 mmol) gave a crude product, which was purified by flash chromatography (gradient elution 9:1→8:2 petrol–EtOAc) to give the *glycosidated product* **29G** (31.8 mg, 14%) as a colourless oil, *R<sub>f</sub>* 0.15 (8:2 petrol–Et<sub>2</sub>O);  $[\alpha]_{\text{D}}^{20} + 18.9$  (*c* 1.4 in MeOH);  $\nu_{\text{max}}/\text{cm}^{-1}$  (thin film) 3379, 2923, 2104 and 1448;  $\delta_{\text{H}}$  (500 MHz; CDCl<sub>3</sub>) 7.39-7.25 (10H, m, Ph), 5.00 (1H, d, *J* 3.6, 1'-H), 4.91-4.85 (3H, m, CH<sub>2</sub>Ph), 4.59 (1H, d, <sup>2</sup>*J* 11.0, CH<sub>2</sub>Ph), 3.92 (1H, dd, *J* 10.2 and 9.1, 3'-H), 3.89-3.86 (2H, m, 5'-H and 1-H), 3.83-3.73 (2H, m, 3-H and 4-H or 6-H), 3.57 (1H, dt, *J* 13.0 and 4.1, 4-H or 6-H), 3.51 (1H, app t, *J* 9.1, 4'-H), 3.47 (1H, dd, <sup>2</sup>*J* 13.1 and *J* 2.4, 6'<sub>a</sub>-H), 3.40 (1H, dd, *J* 10.2 and 3.6, 2'-H), 3.33 (1H, dd, <sup>2</sup>*J* 13.1 and *J* 5.7, 6'<sub>b</sub>-H), 2.19 (1H, br s, OH), 2.09 (1H, dt, <sup>2</sup>*J* 13.9 and *J* 4.9, 2-H<sub>a</sub>), 2.04-1.97 (2H, m, 2-H<sub>b</sub> and 5-H<sub>a</sub>) and 1.89 (1H, ddd, <sup>2</sup>*J* 12.8, and *J* 9.3 and 3.3, 5-H<sub>b</sub>);  $\delta_{\text{C}}$  (75 MHz, CDCl<sub>3</sub>) 137.6, 137.3, 129.3, 128.6, 128.5, 128.2, 128.1, 124.9, 102.1, 82.6, 77.9, 76.7, 75.7, 75.2, 74.8, 69.0, 66.4, 61.4, 59.7, 51.1, 34.5 and 29.5; *m/z* (ES) 563 (100%, M<sup>+</sup>–N<sub>2</sub>) and 613 (60, MNa<sup>+</sup>); (Found: MNa<sup>+</sup> 613.2361; C<sub>26</sub>H<sub>30</sub>N<sub>12</sub>O<sub>5</sub> requires MNa, 613.2360).

**(1R,3R,4R,6R)-1-O-(2',6'-Azido-2',6'-deoxy-3',4'-di-O-benzyl- $\alpha$ -D-glucopyranosyl)-4,6-diazido-cyclohexane-1,3-diol 29'G**

By Method B, the acceptor **15'** (113 mg, 0.57 mmol) and the donor **21G** (191.2 mg, 0.381 mmol) gave a crude product, which was purified by flash chromatography (gradient elution 9:1→8:2 petrol–EtOAc) to give the *glycosidated product* **29'G** (58.7 mg, 26%) as a colourless oil, *R<sub>f</sub>* 0.15 (8:2 petrol–Et<sub>2</sub>O);  $[\alpha]_{\text{D}}^{20} + 57.4$  (*c* 2.3 in MeOH);  $\nu_{\text{max}}/\text{cm}^{-1}$  (thin film)

3379, 2923, 2104 and 1448;  $\delta_{\text{H}}$  (500 MHz;  $\text{CDCl}_3$ ) 7.39-7.25 (10H, m, Ph), 5.00 (1H, d, 3.6, 1'-H), 4.91-4.85 (3H, m,  $\text{CH}_2\text{Ph}$ ), 4.59 (1H, d,  $^2J$  11.0,  $\text{CH}_2\text{Ph}$ ), 3.92 (1H, dd,  $J$  10.2 and 9.1, 3'-H), 3.89-3.86 (2H, m, 5'-H and 1-H), 3.83-3.73 (2H, m, 6-H or 4-H and 3-H), 3.57 (1H, dt,  $^2J$  13.0 and  $J$  4.1, 6-H or 4-H), 3.51 (1H, d,  $J$  9.1, 4'-H), 3.47 (1H, dd,  $^2J$  13.1 and  $J$  2.4, 6'-<sub>a</sub>-H), 3.40 (1H, dd,  $J$  10.2 and 3.6, 2'-H), 3.33 (1H, dd,  $^2J$  13.1 and  $J$  5.7, 6'-<sub>b</sub>-H), 2.19 (1H, br s, OH), 2.09 (1H, dt,  $^2J$  13.9 and  $J$  4.9, 2- $\text{H}_a$ ), 2.04-1.97 (2H, m, 5- $\text{H}_a$  and 2- $\text{H}_b$ ) and 1.89 (1H, ddd,  $^2J$  12.8, and  $J$  9.3 and 3.3, 5- $\text{H}_b$ );  $\delta_{\text{C}}$  (75 MHz,  $\text{CDCl}_3$ ) 137.9, 137.7, 129.1, 129.0, 128.8, 128.7, 128.5, 128.4, 98.3, 80.3, 79.2, 75.9, 71.9, 69.4, 63.8, 61.9, 59.3, 51.5, 34.3 and 29.8 (5 missing or overlapped);  $m/z$  (ES) 613 (100%,  $\text{MNa}^+$ ) and 563 (80, ( $\text{M}^+ - \text{N}_2$ )); (Found:  $\text{MNa}^+$  613.2369;  $\text{C}_{26}\text{H}_{30}\text{N}_{12}\text{O}_5$  requires  $\text{MNa}$ , 613.2360).

**5'-(2''-Phthalimido-2''-deoxy-3'',4'',6''-tri-*O*-benzyl- $\beta$ -D-glucopyranosyl)-1',3',2,6-tetraazido-6',3,4-tri-*O*-benzyl Neamine 30GF**

By Method A, the donor **21F** (103 mg, 0.15 mmol) and the acceptor **30G** (106 mg, 0.15 mmol) gave a crude product which was purified by column chromatography (gradient elution: 0 : 10  $\rightarrow$  2 : 8 EtOAc–petrol) to yield **30GF** (31 mg, 16%) as a yellow oil,  $R_f$  0.4 (2 : 8 EtOAc–petrol);  $[\alpha]_{\text{D}} +83.1$  (c. 0.52,  $\text{CHCl}_3$ );  $\nu_{\text{max}}/\text{cm}^{-1}$  (thin film) 3031, 2924, 2103 (azide), 1775 (C=O) and 1713 (C=O);  $\delta_{\text{H}}$  (500 MHz;  $\text{CDCl}_3$ ) 7.79-7.77 (1H, m, Phth), 7.68-7.63 (3H, m, Phth), 7.50-7.48 (2H, m, Ph), 7.39-7.16 (23H, m, Ph), 6.99-6.97 (2H, m, Ph), 6.92-6.86 (3H, m, Ph), 5.66 (1H, d,  $J$  7.4, 1''-H), 5.45 (1H, d,  $J$  3.8, 1-H), 4.86-4.76 (5H, m,  $\text{PhCH} \times 5$ ), 4.68-4.47 (6H, m,  $\text{PhCH} \times 6$ ), 4.43-4.38 (3H, m,  $\text{PhCH}$ , 3''- and 2''-H), 4.27 (1H, t,  $J$  8.8, 5'-H), 4.21-4.20 (1H, m, 5-H), 3.98 (1H, t,  $J$  9.2, 3-H), 3.83-3.70 (2H, m, 4''- and 6''<sub>A</sub>-H), 3.72 (1H, dd,  $J$ , 6''<sub>B</sub>-H), 3.55 (1H, t,  $J$  9.2, 4-H), 3.45-3.31 (7H, m, 5''-, 2-, 4'-, 1'-, 3'-, 6<sub>A</sub>- and 6<sub>B</sub>-H), 3.14 (1H, t,  $J$  9.1, 6'-H), 2.22 (1H, app dt,  $J$  13.0 and 4.3, 2'<sub>A</sub>-H) and 1.41 (1H, app q,  $J$  13.0, 2'<sub>B</sub>-H);  $\delta_{\text{C}}$  (125 MHz;  $\text{CDCl}_3$ ) 168.2 (C=O), 167.7, 138.4, 138.1, 138.1, 138.0, 137.8, 137.4, 133.8, 133.7, 131.9, 131.5, 128.4, 128.4, 128.4, 128.3, 128.2, 128.2, 128.0, 127.9, 127.9, 127.9, 127.8, 127.8, 127.6, 127.5, 127.5, 123.6, 123.1, 98.8 (1-C), 95.6 (1'-C), 83.8 (6'-C), 79.9 (4''-C), 79.1, 78.5 (4-C), 76.7 (4'-C), 75.6 (5'-C), 75.1 (5''-C), 74.9 ( $\text{CH}_2$ ), 74.9 ( $\text{CH}_2$ ), 74.7 ( $\text{CH}_2$ ), 74.7 ( $\text{CH}_2$ ), 74.4 ( $\text{CH}_2$ ), 72.8 ( $\text{CH}_2$ ), 70.9 (5-C), 68.9 (6''-C), 62.5 (2-C), 60.7 (1'-

C), 58.8 (6'-C), 56.3 (2'-C), 51.1 (6-C) and 31.8 (2'-C);  $m/z$  (ES) 1280.3 (100%,  $MNa^+$ ); Found  $MNa^+$  1280.4944;  $C_{68}H_{67}N_{13}O_{12}$  requires  $MNa^+$  1280.4930.

**4'-(2'',3'',4'',6''-tetra-*O*-acetyl- $\beta$ -D-glucopyranosyl)-1',3',2,6,-tetraazido-6',3,4-tri-*O*-benzyl Neamine 30GH**

By Method C, the trichloroacetimidate **21H** (90 mg, 0.18 mmol) and the acceptor **30G** (152 mg, 0.21 mmol) gave a crude product which was purified by column chromatography (gradient elution: 1 : 9  $\rightarrow$  3 : 7 EtOAc–petrol) to yield **30GH** (40 mg, 22%) as a colourless oil,  $R_f$  0.15 (2 : 8 EtOAc–petrol);  $[\alpha]_D^{+98.5}$  ( $c$  0.28,  $CHCl_3$ );  $\nu_{max}/cm^{-1}$  (Thin film) 3031, 2936, 2105 (azide), 1758 (C=O) and 1366;  $\delta_H$  (500 MHz;  $CDCl_3$ ) 7.53–7.25 (15H, m, Ph  $\times$  3), 5.68 (1H, d,  $J$  3.8, 1-H), 5.22 (1H, d,  $J$  7.6, 1''-H), 5.14 (1H, dd,  $J$  9.5 and 8.9, 4''-H), 5.08 (1H, dd,  $J$  9.5 and 9.3, 3''-H), 5.04 (1H, dd,  $J$  9.3 and 7.6, 2''-H), 4.95 (1H, d,  $J$  9.6,  $PhCH_A$ ), 4.89 (1H, d,  $J$  11.4,  $PhCH_B$ ), 4.88–4.83 (2H, m,  $PhCH \times 2$ ), 4.68 (1H, d,  $J$  9.6,  $PhCH_A$ ), 4.61 (1H, d,  $J$  11.4,  $PhCH_B$ ), 4.28 (1H, dd,  $J$  12.5 and 4.2, 6''<sub>A</sub>-H), 4.24–4.21 (1H, m, 5-H), 4.12 (1H, app t,  $J$  9.4, 5'-H), 4.10–4.01 (2H, m, 6''<sub>B</sub>- and 3-H), 3.57 (1H, dd,  $J$  9.8 and 9.4, 4'-H), 3.51–3.41 (4H, m, 1'-, 3'-, 6<sub>A</sub>- and 4-H), 3.38–3.34 (3H, m, 6'-, 6<sub>B</sub> and 5''-H), 3.22 (1H, dd,  $J$  10.3 and 3.8, 2-H), 2.73 (1H, app dt,  $J$  12.7 and 4.5, 2''<sub>B</sub>-H), 2.11 (3H, s, *OAc*), 2.02 (3H, s, *OAc*), 2.01 (3H, s, *OAc*), 2.00 (3H, s, *OAc*) and 1.50 (1H, app q,  $J$  12.7, 2''<sub>A</sub>-H);  $\delta_C$  (125 MHz;  $CDCl_3$ ) 170.7 (C=O), 170.2 (C=O), 169.3 (C=O), 168.9 (C=O), 137.7, 137.7, 136.7, 128.9, 128.7, 128.6, 128.5, 128.4, 128.2, 128.0, 127.9, 127.8, 98.9 (1''-C), 97.8 (1-C), 85.0, 79.2, 78.6, 77.8, 75.8 ( $PhCH_2$ ), 75.7, 75.2 ( $PhCH_2$ ), 75.0 ( $PhCH_2$ ), 72.8, 72.2, 71.6, 71.0, 68.0, 62.7 (2-C), 61.7 (6''-C), 60.7, 59.4, 51.1 (6-C), 32.4 (2'-C), 21.0 ( $CH_3$ ), 20.9 ( $CH_3$ ), 20.6 ( $CH_3$ ) and 20.5 ( $CH_3$ );  $m/z$  (ES) 1049.3 (100%,  $MNa^+$ ); Found  $MNa^+$  1049.3770;  $C_{47}H_{54}N_{12}O_{15}$  requires  $MNa^+$  1049.3729.

**5'-(2'',3'',4'',6''-tetra-*O*-acetyl- $\beta$ -L-glucopyranosyl)-1',3',2,6,-tetraazido-6',3,4-tri-*O*-benzyl Neamine 30GH'**

By Method C, the trichloroacetimidate donor **21H'** (176 mg, 0.36 mmol) and the acceptor **30G** (300 mg, 0.43 mmol) gave a crude product which was purified by column

chromatography (gradient elution: 1 : 9 → 3 : 7 EtOAc–petrol) to yield **30GH'** (0.141 g, 38%) as a colourless oil,  $R_f$  0.15 (2 : 8 EtOAc–petrol);  $[\alpha]_D +84.7$  ( $c$  0.67,  $\text{CHCl}_3$ );  $\nu_{\text{max}}/\text{cm}^{-1}$  (Thin film) 3032, 2939, 2105 (azide), 1758 (C=O) and 1367;  $\delta_{\text{H}}$  (500 MHz;  $\text{CDCl}_3$ ) 7.41-7.25 (15H, m, Ph  $\times$  3), 5.53 (1H, d,  $J$  3.9, 1-H), 5.34 (1H, d,  $J$  8.0, 1''-H), 5.19 (1H, t,  $J$  9.5, 3''-H), 5.05 (1H, dd,  $J$  9.5 and 8.0, 2''-H), 5.03 (1H, dd,  $J$  9.5 and 9.2, 4''-H), 4.95 (1H, d,  $J$  11.1, PhCH<sub>A</sub>), 4.93 (1H, d,  $J$  12.2, PhCH<sub>B</sub>), 4.90 (1H, d,  $J$  12.2, PhCH<sub>B</sub>), 4.88 (1 H, d,  $J$  11.2, PhCH<sub>C</sub>), 4.68 (1H, d,  $J$  11.1, PhCH<sub>A</sub>), 4.64 (1H, d,  $J$  11.2, PhCH<sub>C</sub>), 4.37-4.34 (1H, m, 5-H), 4.06 (1H, dd,  $J$  12.2 and 4.7, 6''<sub>A</sub>-H), 4.00-3.94 (3H, m, 5'-, 3- and 6''<sub>B</sub>-H), 3.70-3.66 (1H, m, 5''-H), 3.64 (1H, t,  $J$  9.5, 4-H), 3.61 (1H, t,  $J$  9.7, 4'-H), 3.54 (1H, dd,  $J$  10.0 and 3.9, 2-H), 3.55-3.52 (1H, m, 6<sub>A</sub>-H), 3.44-3.40 (1H, m, 1'-H), 3.39-3.36 (1H, m, 3-H'), 3.33-3.32 (1H, m, 6<sub>B</sub>-H), 3.30 (1H, t,  $J$  9.5, 6'-H), 2.26 (1H, app dt,  $J$  13.0, 4.5, 2'<sub>A</sub>-H), 2.06 (3H, s, OAc), 2.01 (3H, s, OAc), 2.00 (3H, s, OAc), 1.96 (3H, s, OAc) and 1.42 (1H, app q,  $J$  13.0, 2'<sub>B</sub>-H);  $\delta_{\text{C}}$  (75 MHz;  $\text{CDCl}_3$ ) 170.5 (CH<sub>3</sub>CO), 169.9 (CH<sub>3</sub>CO), 169.4 (CH<sub>3</sub>CO), 169.0 (CH<sub>3</sub>CO), 137.9, 137.5, 137.4, 128.5, 128.5, 128.2, 128.1, 128.0, 127.8, 127.7, 99.3 (1''-C), 96.8 (1-C), 81.7, 81.5, 80.2, 78.5, 78.2, 75.7, 75.5, 75.2, 72.9, 72.1, 71.9, 71.6, 68.7, 63.7 (2-C), 62.0 (6''-C), 59.5, 59.0, 50.7 (6-C), 32.2 (2'-C), 20.6 (CH<sub>3</sub>CO), 20.6 (CH<sub>3</sub>CO), 20.6 (CH<sub>3</sub>CO) and 20.5 (CH<sub>3</sub>CO) (two aromatic peaks overlapped or missing);  $m/z$  (ES) 1049.2 (100%,  $\text{MNa}^+$ ); Found  $\text{MNa}^+$  1049.3710;  $\text{C}_{47}\text{H}_{54}\text{N}_{12}\text{O}_{15}$  requires  $\text{MNa}^+$  1049.3729.

### General procedure for the deprotection of benzylated aminoglycoside derivatives (Method D)

The perbenzylated azidoaminoglycoside (0.12 mmol) was dissolved in a solution of THF (3.6 mL), and 0.1 M aqueous sodium hydroxide solution (0.3 mL) and trimethylphosphine (0.82 mL, 1 M in THF, 6 eq., 0.82 mmol) were added. The reaction was stirred at 50 °C for 2 h and followed by TLC (elution: 2:1 *i*PrOH–NH<sub>4</sub>OH). The reaction mixture was cooled to room temperature and loaded onto a short column (4 cm silica and 1 cm of celite) and eluted (gradient elution 1:0:0 → 1:1:0 → 0:1:0 → 0:2:1 THF–MeOH–NH<sub>4</sub>OH). The fractions containing required product were collected, concentrated under reduced pressure, dissolved in a degassed solution of 1:1 AcOH–H<sub>2</sub>O (4 mL) and Pd(OH)<sub>2</sub>/C (20% Degussa type) was

added. The reaction was stirred at room temperature under atmospheric pressure of hydrogen. After 2 days, the reaction mixture was filtered through a short pad of celite, eluted with water, and the filtrate was concentrated under reduced pressure.

#### **General procedure for the debenzoylation (Method E)**

Sodium methoxide (0.5 eq.) was added to a solution of benzylated aminoglycoside (0.22 mmol) in dry MeOH (1.4 mL). The reaction mixture was stirred at room temperature for 18h and concentrated under reduced pressure.

#### **General procedure for the removal of a phthalimide group (Methods F)**

Hydrazine acetate (83.0 mg, 0.90 mmol) was added in one portion to a stirred solution of the protected aminoglycoside (55.6 mg, 0.45 mmol) in toluene (0.8 ml) and ethanol (1.2 ml). The reaction mixture was heated at reflux at 110 °C for 5 days. The reaction was allowed to cool to room temperature and the solvent was removed under reduced pressure. The resulting residue was redissolved in 1:1 dichloromethane–ethanol (1:1) and washed with water (20 ml), and the aqueous layer was back-washed with dichloromethane–ethanol (10 ml, 1:1). The combined organic fractions were dried (Na<sub>2</sub>SO<sub>4</sub>) and the solvent removed under reduced pressure to give the crude product which was purified by column chromatography (elution: 7:3 petrol–EtOAc) to yield a solution of the crude product which was evaporated under reduced pressure.

#### **Alternative procedure for the deprotection of benzylated aminoglycosides (Method G)**

The perbenzylated azidoaminoglycoside (142.4 mg, 0.12 mmol) was dissolved in 1:1:1 EtOAc–MeOH–H<sub>2</sub>O (6 mL), Pd(OH)<sub>2</sub>/C (150 mg) was added and the reaction was stirred under an atmospheric pressure of hydrogen. After two days, the reaction mixture was filtered through a short pad of celite, eluting sequentially with ethyl acetate, methanol and water. The filtrate was concentrated under reduced pressure, redissolved in a degassed solution of 1:1 AcOH–H<sub>2</sub>O (4 mL), Pd(OH)<sub>2</sub>/C (20% Degussa type) added and the reaction mixture stirred under an atmospheric of hydrogen. After 2 days, the reaction mixture was filtered under a

short pad of celite, eluting with water. The filtrate was concentrated under reduced pressure to give a crude product.

**(1*R*,2*S*,3*S*,4*R*,6*S*)-1-*O*-(6'-Amino-6'-deoxy-2',3',4'-triol- $\alpha$ -D-glucopyranosyl)-4,6-diamino-cyclohexan-2,3-ol, tri-acetate salt 6A**

By method D, **31A** (78.7 mg, 0.12 mmol) gave the aminoglycoside **6A** (51.9 mg, 86%) as an orange oil,  $[\alpha]_D +13.3$  (c. 0.15 in H<sub>2</sub>O);  $\delta_H$  (500 MHz, D<sub>2</sub>O) 5.46 (1H, d, *J* 3.1, 1'-H), 3.96 (1H, t, *J* 8.2, 1-H), 3.69 (1H, dd, *J* 9.7 and 9.2, 4'-H), 3.64-3.24 (6H, m, 2'-H, 3'-H, 5'-H, 6'-H, 4-H and 6-H), 3.18-3.00 (3H, m, 6'-H, 2-H and 3-H), 2.21 (1H, broad d, *J* 12.3, 5-H<sub>A</sub>), 1.85 (9H, s, 3 OCOCH<sub>3</sub>) and 1.51-1.40 (1H, m, 5-H<sub>B</sub>);  $\delta_C$  (75 MHz, D<sub>2</sub>O) 182 (C=O), 97.9 (1'-C), 82.6 (1-C), 75.2 (2'-C), 74.3 (3'-C), 72.6 (4'-C), 71.5-71.4 (2-C and 3-C), 61.3 (5'-C), 50.7, 48.7 (4-C and 6-C), 40.8 (6'-C), 31.8 (5-C), 23.7, 23.2 (CH<sub>3</sub>); *m/z* (ES) 324.3 (40%, MH<sup>+</sup>), 203.7 (100); (Found: MNa<sup>+</sup>, 346.1588. C<sub>12</sub>H<sub>25</sub>O<sub>7</sub>N<sub>3</sub> requires MNa, 346.1590).

**(1*R*,2*S*,3*S*,4*R*,6*S*)-1-*O*-(6'-Amino-6'-deoxy-2',3',4'-triol- $\alpha$ -L-glucopyranosyl)-4,6-diamino-cyclohexan-2,3-ol, tri-acetate salts 6A'**

By method D, **31A'** (57.9 mg, 0.09 mmol) gave the aminoglycoside **6A'** (23.3 mg, 51%) as an orange oil,  $[\alpha]_D -26.7$  (c. 0.15 in H<sub>2</sub>O);  $\delta_H$  (500 MHz, D<sub>2</sub>O) 5.03 (1H, s, 1'-H), 4.07 (1H, m, 1-H), 3.68-3.55 (3H, m, 4'-H, 2'-H and 3'-H), 3.47-3.35 (5H, m, 5'-H, 6'-H, 2-H, 4-H and 6-H), 3.18-3.00 (2H, m, 6'-H and 3-H), 2.18 (1H, broad d, *J* 13.0, 5-H<sub>A</sub>), 1.88 (9H, s, OCOCH<sub>3</sub>) and 1.54-1.45 (1H, m, 5-H<sub>B</sub>);  $\delta_C$  (75 MHz, D<sub>2</sub>O) 181.0 (C=O), 101.4 (1'-C), 85.6 (1-C), 74.7 (2'-C), 74.3 (3'-C), 73.1 (4'-C), 71.9, 71.2 (3-C and 2-C), 68.4 (5'-C), 51.1, 50.7 (4-C and 6-C), 40.6 (6'-C), 31.8 (5-C), 23.6, 23.1 (CH<sub>3</sub>); *m/z* (ES) 324.3 (40%, MH<sup>+</sup>) and 203.7 (100); (Found: MNa<sup>+</sup>, 346.1584. C<sub>12</sub>H<sub>25</sub>O<sub>7</sub>N<sub>3</sub> requires MNa, 346.1590).

**(1*R*,2*S*,3*S*,4*R*,6*S*)-1-*O*-(6'-Amino-6'-deoxy-2',3',4'-triol- $\alpha$ -L-glucopyranosyl)-3-*O*-(6''-Amino-6''-deoxy-2'',3'',4''-triol- $\alpha$ -L-glucopyranosyl)-4,6-diamino-cyclohexan-1,2,3-ol, tetra-acetate salt 6A'A'**

By method D, **27 A'A'** (142 mg, 0.13 mmol) gave the aminoglycoside **6A'A'** (37.3 mg, 41%) as an orange oil;  $[\alpha]_D -26.7$  (c. 0.18 in H<sub>2</sub>O);  $\delta_H$  (500 MHz, D<sub>2</sub>O) 5.51 (1H, br s, 1''-H), 5.06 (1H, br s, 1'-H), 4.11 (1H, m, 1-H), 3.92 (1H, m, 2'-H), 3.75-3.50 (10H, m, 2''-H, 3'-H, 3''-H, 4'-H, 4''-H, 5'-H, 5''-H, 3-H, 4-H and 6-H), 3.40-3.25 (4H, m, 6'-H, 6''-H and 2-H), 3.20-3.15 (1H, br m, 6'-H), 2.20-2.35 (1H, br m, 5-H<sub>A</sub>), 1.88 (12H, s, OCOCH<sub>3</sub>) and 1.60-1.50 (1H, m, 5-H<sub>B</sub>);  $m/z$  (ES) 506.9 (100%, MNa<sup>+</sup>), 484.9 (70, MH<sup>+</sup>); (Found: MNa<sup>+</sup>, 507.2272. C<sub>18</sub>H<sub>36</sub>O<sub>11</sub>N<sub>4</sub> requires MNa, 507.2278).

**(1R,2S,3S,4R,6S)-1-O-(6'-Amino-6'-deoxy-2',3',4'-triol- $\alpha$ -D-glucopyranosyl)-3-O-(6''-Amino-6''-deoxy-2'',3'',4''-triol- $\alpha$ -D-glucopyranosyl)-4,6-diamino-cyclohexan-1,2,3-ol, tetra-acetate salt **6AA****

By method D, **27AA** (135 mg, 0.12 mmol) gave the aminoglycoside **6AA** (21.7 mg, 25%) as a brown oil,  $[\alpha]_D +20.2$  (c. 0.21 in H<sub>2</sub>O), spectroscopically identical to the enantiomer (**27A'A'**) prepared previously.

**(1R,2S,3S,4R,6S)-1-O-(6'-Amino-6'-deoxy-2',3',4'-triol- $\alpha$ -D-glucopyranosyl)-3-O-(6''-Amino-6''-deoxy-2'',3'',4''-triol- $\alpha$ -L-glucopyranosyl)-4,6-diamino-cyclohexan-1,2,3-ol, tetra-acetate salt **6AA'****

By method D, **27AA'** (130 mg, 0.12 mmol) gave the aminoglycoside **6AA'** (66.8 mg, 77%) as a brown oil,  $\delta_H$  (500 MHz, D<sub>2</sub>O) 5.50 (2H, broad s, 1'-H and 1''-H), 3.91 (1H, broad s, 1-H), 3.71-3.51 (7H, m, 2'-H, 2''-H, 3'-H, 3''-H, 4'-H, 4''-H, and 2-H), 3.45-3.20 (8H, m, 5'-H, 5''-H, 6'-H, 6''-H, 4-H and 6-H), 3.18-3.00 (1H, m, 3-H), 2.40-2.30 (1H, m, 5-H<sub>A</sub>), 1.82 (12H, s, OCOCH<sub>3</sub>) and 1.70-1.60 (1H, m, 5-H<sub>B</sub>);  $\delta_C$  (75 MHz, D<sub>2</sub>O) 181.9 (C=O), 103.9 (1'-C), 80.6 (1-C), 75.6, 73.7, 72.7 (2'-C, 3'-C and 4'-C), 71.2, 71.1 (3-C and 2-C), 69.1 (5'-C), 48.2 (4-C and 6-C), 40.6 (6'-C), 29.4 (5-C) and 23.5 (CH<sub>3</sub>);  $m/z$  (ES) 485.5 (60%, MH<sup>+</sup>), 324.3 (53), 203.7 (100) and 143.1 (84); (Found: MNa<sup>+</sup>, 507.2153. C<sub>18</sub>H<sub>36</sub>O<sub>11</sub>N<sub>4</sub> requires MNa, 507.2150).



**(1R,2S,3S,4R,6S)-1-O-(6'-Amino-6'-deoxy-2',3',4'-triol- $\alpha$ -L-glucopyranosyl)-3-O-(6''-Amino-6''-deoxy-2'',3'',4''-triol- $\alpha$ -D-glucopyranosyl)-4,6-diamino-cyclohexan-1,2,3-ol, tetra-acetate salt 6A'A**

By method D, **27A'A** (101 mg, 0.09 mmol) gave the aminoglycoside **6A'A** (29.6 mg, 46%) as an orange oil,  $\delta_{\text{H}}$  (500 MHz, D<sub>2</sub>O) 5.07 (2H, br s, 1'-H and 1''-H), 4.06 (1H, m, 1-H), 3.88-3.60 (8H, m, 3'-H, 3''-H, 4'-H, 4''-H, 5'-H, 5''-H, 4-H and 6-H), 3.50-3.10 (7H, m, 2'-H, 2''-H, 6'-H, 6''-H and 2-H), 2.20-2.30 (1H, br m, 5-H<sub>A</sub>), 1.90 (12H, s, OCOCH<sub>3</sub>) and 1.60-1.50 (1H, m, 5-H<sub>B</sub>);  $m/z$  (ES) 506.9 (100%, MNa<sup>+</sup>), 484.9 (85, MH<sup>+</sup>) and 298.9 (68); (Found: MH<sup>+</sup>, 485.2473. C<sub>18</sub>H<sub>36</sub>O<sub>11</sub>N<sub>4</sub> requires *MH*, 485.2459).

**(1R,2S,3S,4R,6S)-1-O-(6'-Amino-6'-deoxy-2',3',4'-triol- $\alpha$ -D-glucopyranosyl)-3-O-(6''-Amino-6''-deoxy-2'',3'',4''-triol- $\beta$ -D-glucopyranosyl)-4,6-diamino-cyclohexan-1,2,3-ol, tetra-acetate salt 6AB**

By methods E and D, **27AB** (69 mg, 0.06 mmol) gave the aminoglycoside **6AB** (16 mg, 37%) as a brown oil,  $[\alpha]_{\text{D}}$  -126 (c. 1.00 in H<sub>2</sub>O);  $\delta_{\text{H}}$  (500 MHz, D<sub>2</sub>O) 5.40 (1H, broad s, 1'-H or 1''-H), 4.75 (1H, broad s, 1'-H or 1''-H), 3.95-3.20 (10H, m), 3.20-3.05 (1H, m), 2.40-2.30 (1H, m, 5-H<sub>A</sub>), 2.20 (12H, s, CH<sub>3</sub>) and 1.80-1.70 (1H, m, 5-H<sub>B</sub>);  $m/z$  (ES) 485.1 (10%, MH<sup>+</sup>), 177.7 (60) and 141.7 (100); (Found: MH<sup>+</sup>, 485.2452. C<sub>18</sub>H<sub>36</sub>O<sub>11</sub>N<sub>4</sub> requires *MH*, 485.2459).

**(1R,2S,3S,4R,6S)-1-O-(6'-Amino-6'-deoxy-2',3',4'-triol- $\alpha$ -D-glucopyranosyl)-3-O-(6''-Amino-6''-deoxy-2'',3'',4''-triol- $\beta$ -L-glucopyranosyl)-4,6-diamino-cyclohexan-1,2,3-ol tetra-acetate salt 6AB'**

By methods E and D, **27AB'** (51 mg, 0.04 mmol) gave the aminoglycoside **6AB'** (16.9 mg, 58%) as a brown oil,  $[\alpha]_{\text{D}}$  20.0 (c. 0.58 in H<sub>2</sub>O);  $\delta_{\text{H}}$  (500 MHz, D<sub>2</sub>O) 4.80-4.65 (2H, broad m, 1'-H and 1''-H), 3.90-3.10 (11H, m), 2.50-2.40 (1H, m, 5-H<sub>A</sub>), 2.01 (12H, s, CH<sub>3</sub>) and 1.60-1.50 (1H, m, 5-H<sub>B</sub>);  $m/z$  (ES) 485.1 (8%, MH<sup>+</sup>), 346.7 (25) and 231.7 (50); (Found: MH<sup>+</sup>, 485.2456. C<sub>18</sub>H<sub>36</sub>O<sub>11</sub>N<sub>4</sub> requires *MH*, 485.2459).

**(1*R*,2*S*,3*S*,4*R*,6*S*)-1-*O*-(6'-Amino-6'-deoxy-2',3',4'-triol- $\alpha$ -L-glucopyranosyl)-3-*O*-(6''-Amino-6''-deoxy-2'',3'',4''-triol- $\beta$ -D-glucopyranosyl)-4,6-diamino-cyclohexan-1,2,3-ol tetra-acetate salt 6A'B**

By methods E and D, 27A'B (45 mg, 0.04 mmol) gave the aminoglycoside 6A'B (14 mg, 48%) as a brown oil;  $[\alpha]_D -40.0$  (c. 1.3 in H<sub>2</sub>O);  $\delta_H$  (500 MHz, D<sub>2</sub>O) 4.75 (1H, broad s, 1'-H), 4.52 (1H, d, *J* 7.2, 1''-H), 3.79-3.50 (2H, m), 3.50-3.28 (5H, m), 3.28-2.78 (10H, m), 2.23-2.09 (1H, m, 5-H<sub>A</sub>), 1.63 (12H, s, CH<sub>3</sub>) and 1.53-1.38 (1H, m, 5-H<sub>B</sub>);  $\delta_C$  (75 MHz, D<sub>2</sub>O) 183.0 (C=O), 102.8, 101.3 (1'-C and 1''-C), 83.8, 75.3, 74.0, 73.3, 73.0, 71.9, 71.0, 68.8, 50.8, 49.2, 40.6 (CH<sub>2</sub>), 30.6 and 23.6 (CH<sub>3</sub>); *m/z* (ES) 485.1 (32%, MH<sup>+</sup>); (Found: MH<sup>+</sup>, 485.2455. C<sub>18</sub>H<sub>37</sub>O<sub>11</sub>N<sub>4</sub> requires *MH*, 485.2459).

**(1*R*,2*S*,3*S*,4*R*,6*S*)-1-*O*-(6'-Amino-6'-deoxy-2',3',4'-triol- $\alpha$ -L-glucopyranosyl)-3-*O*-(6''-Amino-6''-deoxy-2'',3'',4''-triol- $\beta$ -L-glucopyranosyl)-4,6-diamino-cyclohexan-1,2,3-ol tetra-acetate salt 6A'B'**

By methods E and D, 27A'B' (36 mg, 0.03 mmol) gave the aminoglycoside 6A'B' (7.2 mg, 33%) as a brown oil,  $[\alpha]_D -57.2$  (c. 0.72 in H<sub>2</sub>O);  $\delta_H$  (500 MHz, D<sub>2</sub>O) 5.25-5.11 (1H, m, 1'-H or 1''-H), 4.86-4.75 (1H, m, 1'-H or 1''-H), 4.19-3.69 (4H, m), 3.69-3.25 (13H, m), 2.59-2.50 (1H, m, 5-H), 2.13 (12H, s, CH<sub>3</sub>) and 2.13-1.90 (1H, m, 5-H); *m/z* (ES) 485.1 (10%, MH<sup>+</sup>) and 143.0 (100); (Found: MH<sup>+</sup>, 485.2463. C<sub>18</sub>H<sub>36</sub>O<sub>11</sub>N<sub>4</sub> requires *MH*, 485.2459).

**(1*R*,2*S*,3*S*,4*R*,6*S*)-1-*O*-(6'-Amino-6'-deoxy-2',3',4'-triol- $\alpha$ -D-glucopyranosyl)-3-*O*-(3''-Amino-3''-deoxy-2'',4'',6''-triol- $\beta$ -D-glucopyranosyl)-4,6-diamino-cyclohexan-1,2,3-ol tetra-acetate salt 6AD**

By methods E and D, 27AD (61.2 mg, 0.06 mmol) gave the aminoglycoside 6AD (22 mg, 51%) as a brown oil,  $[\alpha]_D -43.3$  (c. 0.12 in H<sub>2</sub>O);  $\delta_H$  (500 MHz, D<sub>2</sub>O) 5.58-5.48 (1H, m, 1''-H), 5.00-4.88 (1H, m, 1'-H), 4.00-3.48 (12H, m), 3.48-3.29 (3H, m), 3.29-3.08 (2H, m, 3''-H and 6''-H<sub>A</sub>), 2.55-2.39 (1H, m, 5-H<sub>A</sub>), 2.05-1.81 (1H, m, 5-H<sub>B</sub>) and 1.93 (12H, s, CH<sub>3</sub>);  $\delta_C$  (75 MHz, D<sub>2</sub>O) 180.0 (C=O), 106.1-103.9 (1''-C and 1'-C), 77.2, 71.1, 69.9, 66.1, 60.4, 57.9

(CH<sub>2</sub>), 49.2, 40.7 (CH<sub>2</sub>), 27.5 (CH<sub>2</sub>) and 22.8 (CH<sub>3</sub>); *m/z* (ES) 507.2 (50%, MNa<sup>+</sup>) and 485.1 (100%, M<sup>+</sup>+H); (Found: MNa<sup>+</sup>, 507.2300. C<sub>18</sub>H<sub>36</sub>O<sub>11</sub>N<sub>4</sub> requires *MNa*, 507.2278).

**(1*R*,2*S*,3*S*,4*R*,6*S*)-1-*O*-(6'-Amino-6'-deoxy-2',3',4'-triol- $\alpha$ -L-glucopyranosyl)-3-*O*-(3''-Amino-3''-deoxy-2'',4'',6''-triol- $\beta$ -D-glucopyranosyl)-4,6-diamino-cyclohexan-1,2,3-ol tetra-acetate salt 6A'D**

By methods E and D, 27A'D (43.6 mg, 0.04 mmol) gave the aminoglycoside 6A'D (19.4 mg, 67%) as a brown oil, [ $\alpha$ ]<sub>D</sub> -32.8 (c. 1.28 in H<sub>2</sub>O);  $\delta$ <sub>H</sub> (500 MHz, D<sub>2</sub>O) 5.07-5.00 (1H, m, 1''-H), 4.85-4.75 (1H, m, 1'-H), 4.07-3.96 (1H, m), 3.96-3.42 (12H, m), 3.42-3.25 (2H, m), 3.25-3.10 (2H, m), 2.50-2.38 (1H, m, 5-H<sub>A</sub>), 2.00 (12H, s, CH<sub>3</sub>) and 2.00-1.83 (1H, m, 5-H<sub>B</sub>); *m/z* (ES) 507.1 (23%, MNa<sup>+</sup>) and 485.1 (65%, MH<sup>+</sup>); (Found: MH<sup>+</sup>, 485.2467. C<sub>18</sub>H<sub>37</sub>O<sub>11</sub>N<sub>4</sub> requires *MH*, 485.2459).

**(1*R*,2*S*,3*S*,4*R*,6*S*)-1-*O*-(6'-Amino-6'-deoxy-2',3',4'-triol- $\alpha$ -L-glucopyranosyl)-3-*O*-(3''-Amino-3''-deoxy-2'',4'',6''-triol- $\alpha$ -D-glucopyranosyl)-4,6-diamino-cyclohexan-1,2,3-ol tetra-acetate salt 6A'C**

By method D, 27A'C (54.9 mg, 0.05 mmol) gave the aminoglycoside 6A'C (31.9 mg, 88%) as a brown oil; [ $\alpha$ ]<sub>D</sub> +10.0 (c. 0.84 in H<sub>2</sub>O);  $\delta$ <sub>H</sub> (500 MHz, D<sub>2</sub>O) 5.01 (1H, d, *J* 3.2, 1''-H), 5.00 (1H, broad s, 1'-H), 4.05-3.95 (1H, m), 3.90-3.80 (1H, m, 2''-H), 3.80-3.50 (7H, m), 3.50-3.05 (8H, m), 2.45-2.38 (1H, m, 5-H<sub>A</sub>), 1.99 (12H, s, CH<sub>3</sub>) and 1.99-1.80 (1H, m, 5-H<sub>B</sub>);  $\delta$ <sub>C</sub> (75 MHz, D<sub>2</sub>O) 180.7 (C=O), 102.1, 99.2 (1'-C and 1''-C), 83.8, 73.2, 72.0, 70.9, 68.5, 65.9, 60.4 (CH<sub>2</sub>), 50.3, 40.5 (CH<sub>2</sub>), 27.9 (CH<sub>2</sub>) and 22.9 (CH<sub>3</sub>); *m/z* (ES) 485.3 (100%, MH<sup>+</sup>), 396.3 (50) and 324.2 (40); (Found: MH<sup>+</sup>, 485.2482. C<sub>18</sub>H<sub>36</sub>O<sub>11</sub>N<sub>4</sub> requires *MH*, 485.2459).

**(1*R*,2*S*,3*S*,4*R*,6*S*)-1-*O*-(6'-Amino-6'-deoxy-2',3',4'-triol- $\alpha$ -D-glucopyranosyl)-3-*O*-(2''-Amino-2''-deoxy-3'',4'',6''-triol- $\alpha$ -D-glucopyranosyl)-4,6-diamino-cyclohexan-1,2,3-ol tetra-acetate salt 6AE**

By method D, 27AE (29 mg, 0.03 mmol) gave the aminoglycoside 6AE (13.8 mg, 63%) as a brown oil; [ $\alpha$ ]<sub>D</sub> +34.8 (c. 1.38 in H<sub>2</sub>O);  $\delta$ <sub>H</sub> (500 MHz, D<sub>2</sub>O) 5.51-5.50 (1H, m, 1'-H), 4.80-

4.72 (1H, m, 1''-H), 4.12-3.37 (14H, m), 3.36-3.10 (3H, m), 2.61-2.50 (1H, m, 5-H<sub>A</sub>), 1.98 (12H, s, CH<sub>3</sub>) and 1.77-1.65 (1H, m, 5-H<sub>B</sub>); δ<sub>C</sub> (75 MHz, D<sub>2</sub>O) 181.7, 180.5 (C=O), 104.2 (1''-C), 95.9 (1'-C), 79.4, 73.6, 72.7, 72.1, 69.1, 60.8 (CH<sub>2</sub>), 54.4, 50.0, 40.7 (CH<sub>2</sub>), 22.6 (CH<sub>2</sub>) and 20.7 (CH<sub>3</sub>); *m/z* (ES) 507.1 (20%, MNa<sup>+</sup>), 485.1 (100%, MH<sup>+</sup>) and 324.1 (60); (Found: MH<sup>+</sup>, 485.2451. C<sub>18</sub>H<sub>36</sub>O<sub>11</sub>N<sub>4</sub> requires *MH*, 485.2459).

**(1*R*,2*S*,3*S*,4*R*,6*S*)-1-*O*-(6'-Amino-6'-deoxy-2',3',4'-triol-α-L-glucopyranosyl)-3-*O*-(2''-Amino-2''-deoxy-3'',4'',6''-triol-α-D-glucopyranosyl)-4,6-diamino-cyclohexan-1,2,3-ol tetra-acetate salt 6A'E**

By method D, 27A'E (36.2 mg, 0.32 mmol) gave the aminoglycoside 6A'E (12.9 mg, 6%) as a brown oil; [α]<sub>D</sub>, 204.4 (c. 0.64 in H<sub>2</sub>O); δ<sub>H</sub> (500 MHz, D<sub>2</sub>O) 5.42-5.37 (1H, m, 1'-H), 5.04-5.00 (1H, m, 1''-H), 4.00-3.53 (7H, m), 3.53-3.25 (5H, m), 3.17-3.05 (1H, m, 2''-H), 2.43-2.30 (1H, m, 5-H<sub>A</sub>), 1.93 (12H, s, CH<sub>3</sub>) and 1.80-1.68 (1H, m, 5-H<sub>B</sub>); *m/z* (ES) 485.2 (100, MH<sup>+</sup>) and 324.2 (40); (Found: MH<sup>+</sup>, 485.2459. C<sub>18</sub>H<sub>36</sub>O<sub>11</sub>N<sub>4</sub> requires *MH*, 485.2457).

**(1*R*,2*S*,3*S*,4*R*,6*S*)-1-*O*-(6'-Amino-6'-deoxy-2',3',4'-triol-α-D-glucopyranosyl)-3-*O*-(2''-Amino-2''-deoxy-3'',4'',6''-triol-β-D-glucopyranosyl)-4,6-diamino-cyclohexan-1,2,3-ol tetra-acetate salt 6AF**

By methods F and D, 27AF (55.6 mg, 0.45 mmol) gave the aminoglycoside 6AF (13.2 mg, 4%) as a brown oil; [α]<sub>D</sub> +15.7 (c. 1.32 in H<sub>2</sub>O); δ<sub>H</sub> (500 MHz, D<sub>2</sub>O) 5.45 (1H, d, *J* 3.3, 1'-H), 4.91 (1H, d, *J* 8.3, 1''-H), 3.96-3.79 (4H, m), 3.71-3.25 (11H, m), 3.14-3.03 (2H, m, 6'-H and 2''-H), 2.50-2.40 (1H, m, 5-H<sub>A</sub>), 1.96 (12H, s, CH<sub>3</sub>) and 1.89-1.79 (1H, m, 5-H<sub>B</sub>); *m/z* (ES) 485.1 (18%, MH<sup>+</sup>) and 101.0 (100); (Found: MH<sup>+</sup>, 485.2446. C<sub>18</sub>H<sub>36</sub>O<sub>11</sub>N<sub>4</sub> requires *MH*, 485.2459).

**(1*R*,2*S*,3*S*,4*R*,6*S*)-1-*O*-(6'-Amino-6'-deoxy-2',3',4'-triol-α-L-glucopyranosyl)-3-*O*-(2''-Amino-2''-deoxy-3'',4'',6''-triol-β-D-glucopyranosyl)-4,6-diamino-cyclohexan-1,2,3-ol tetra-acetate salt 6A'F**

By methods F and D, **27A'F** (62.4 mg, 0.51 mmol) gave the aminoglycoside **6A'F** (13.2 mg, 4%) as a brown oil,  $[\alpha]_D -53.9$  (c. 0.75 in H<sub>2</sub>O);  $\delta_H$  (500 MHz, D<sub>2</sub>O) 5.00 (1H, d, *J* 2.5, 1'-H), 4.93 (1H, d, *J* 8.4, 1''-H), 4.08-3.96 (1H, m, 6''-H<sub>A</sub>), 3.96-3.55 (7H, m, 2-H, 2'-H, 6'-H, 4''-H, 5''-H and 6''-H), 3.55-3.04 (6H, m, 1-H, 3-H, 4-H, 6-H, 3'-H and 4'-H), 2.53-2.39 (1H, m, 5-H<sub>A</sub>), 1.98-1.75 (1H, m, 5-H<sub>B</sub>) and 1.90 (12H, s, CH<sub>3</sub>);  $\delta_C$  (75 MHz, D<sub>2</sub>O) 180.9 (C=O), 102.2, 99.8 (1'-C and 1''-C), 83.8, 79.8, 76.9, 73.5, 73.0, 72.1, 71.9, 70.8, 69.8, 68.9, 60.7 (CH<sub>2</sub>), 56.0, 50.6, 48.7, 40.5 (CH<sub>2</sub>), 30.6, 27.9 (CH<sub>2</sub>) and 23.1 (CH<sub>3</sub>); *m/z* (ES) 507.2 (16%, MNa<sup>+</sup>), 485.1 (88%, MH<sup>+</sup>), 284.2 (78) and 263.7 (100); (Found: MH<sup>+</sup>, 485.2448. C<sub>18</sub>H<sub>36</sub>O<sub>11</sub>N<sub>4</sub> requires *MH*, 485.2459).

**(1R,2R,4R,5R)-1-O-(6'-Amino-6'-deoxy-2',3',4'-triol- $\alpha$ -D-glucopyranosyl)-4-O-(6''-Amino-6''-deoxy-2'',3'',4''-triol- $\alpha$ -D-glucopyranosyl)-2,5-diamino-cyclohexanol, tetra-acetate salt **7AA****

By method G, **28AA** (142.4 mg, 0.12 mmol) gave the aminoglycoside **7AA** (77.0 mg, 85% after two steps) as an orange oil,  $[\alpha]_D +47.6$  (c. 1.10 in H<sub>2</sub>O);  $\delta_H$  (300 MHz, D<sub>2</sub>O) 5.00 (2H, d, *J* 2.9, 1'-H and 1''-H), 4.08-3.96 (2H, m, 1-H or 4-H and 2-H or 5-H), 3.88-3.76 (2H, m, 5'-H and 5''-H), 3.69-3.56 (4H, m, 3'-H, 3''-H, 1-H or 4-H and 2-H or 5-H), 3.56-3.46 (2H, m, 2'-H and 2''-H), 3.35-3.21 (4H, m, 4'-H, 4''-H, 6'-H<sub>A</sub> and 6''-H<sub>A</sub>), 3.14-3.02 (2H, m, 6'-H<sub>B</sub> and 6''-H<sub>B</sub>), 2.34-2.10 (4H, m, 3-H and 6-H) and 1.88 (12H, s, 4 OCOCH<sub>3</sub>);  $\delta_C$  (75 MHz, D<sub>2</sub>O) 180.0 (C=O), 99.5 (1'-C and 1''-C), 73.4, 72.4, 71.3, 71.2, 68.9 (5'-C and 5''-C), 49.1 (2-C and 5-C), 40.6 (6'-C and 6''-C), 29.9 (3-C and 6-C) and 22.7 (CH<sub>3</sub>); *m/z* (ES) 469 (100%, MH<sup>+</sup>); (Found: MH<sup>+</sup> 469.2535; C<sub>18</sub>H<sub>37</sub>N<sub>4</sub>O<sub>10</sub> requires *MH*, 469.2510).

**(1S,2S,4S,5S)-1-O-(6'-Amino-6'-deoxy-2',3',4'-triol- $\alpha$ -D-glucopyranosyl)-4-O-(6''-Amino-6''-deoxy-2'',3'',4''-triol- $\alpha$ -D-glucopyranosyl)-2,5-diamino-cyclohexane-1,4-diol, tetra-acetate salt **7'AA****

By method G, **28'AA** (93.0 mg, 0.08 mmol) gave the aminoglycoside **7'AA** (50.0 mg, 84% after two steps) as an orange oil;  $[\alpha]_D +91.2$  (c. 1.00 in H<sub>2</sub>O);  $\delta_H$  (300 MHz, D<sub>2</sub>O) 5.03 (2H, d, *J* 2.9, 1'-H and 1''-H), 4.09-3.94 (2H, m, 1-H or 4-H and 2-H or 5-H), 3.75-3.66 (2H, m, 5'-

H and 5''-H), 3.66-3.54 (4H, m, 3'-H, 3''-H, 1-H or 3-H and 2-H or 5-H), 3.54-3.40 (2H, m, 2'-H and 2''-H), 3.31-3.16 (4H, m, 4'-H, 4''-H, 6'-H<sub>A</sub> and 6''-H<sub>A</sub>), 3.11-3.00 (2H, m, 6'-H<sub>B</sub> and 6''-H<sub>B</sub>), 2.25-2.00 (4H, m, 3-H and 6-H) and 1.92 (12H, s, 4 OCOCH<sub>3</sub>); δ<sub>C</sub> (75 MHz, D<sub>2</sub>O) 180.0 (C=O), 95.9 (1'-C and 1''-C), 72.2, 71.3, 70.9, 70.3, 68.8, 49.5 (2-C and 5-C), 40.6 (6'-C and 6''-C), 27.5 (3-C and 6-C) and 24.4 (CH<sub>3</sub>); *m/z* (ES) 469 (100%, MH<sup>+</sup>); (Found: MH<sup>+</sup> 469.2534; C<sub>18</sub>H<sub>37</sub>N<sub>4</sub>O<sub>10</sub> requires *MH*, 469.2510).

**(1*S*,2*S*,4*S*,5*S*)-1-*O*-(6'-Amino-6'-deoxy-2',3',4'-triol-α-D-glucopyranosyl)-4-*O*-(6''-Amino-6''-deoxy-2'',3'',4''-triol-α-L-glucopyranosyl)-2,5-diamino-cyclohexane-1,4-diol, tetra-acetate salt 7'AA'**

By method G, **28'AA'** (40.3 mg, 36.14 μmol) was converted into the *acetate salt of aminoglycoside 7'AA'* (17.3 mg, 68%) as a colourless amorphous solid; [α]<sub>D</sub><sup>20</sup> +12.7 (*c* 1.23 in H<sub>2</sub>O); δ<sub>H</sub> (500 MHz; D<sub>2</sub>O) 5.05-2.12 (20H, m) and 1.95 (12H, s, OAc); *m/z* (ES) 469 (100%, MH<sup>+</sup>); (Found: MH<sup>+</sup> 469.2534; C<sub>18</sub>H<sub>37</sub>N<sub>4</sub>O<sub>10</sub> requires *MH*, 469.2510).

**(1*R*,2*R*,4*R*,5*R*)-1-*O*-(6'-Amino-6'-deoxy-2',3',4'-triol-α-D-glucopyranosyl)-4-*O*-(6''-Amino-6''-deoxy-2'',3'',4''-triol-β-D-glucopyranosyl)-2,5-diamino-cyclohexane-1,4-diol, tetraacetate salt 7AB**

By methods E and G, **28AB** (185.0 mg, 0.16 mmol) gave the aminoglycoside **7AB** (87.6 mg, 77% after two steps) as an orange oil, [α]<sub>D</sub> +11.9 (*c* 0.97 in H<sub>2</sub>O); δ<sub>H</sub> (300 MHz, D<sub>2</sub>O) 5.08-5.00 (2H, m, 1'-H or 1''-H and H), 4.64-4.35 (2H, m, 1'-H or 1''-H and H), 4.35-4.00 (2H, m), 4.00-3.00 (12H, m), 3.00-2.50 (4H, m), 2.34-2.03 (2H, m), 1.91 (12H, s, 4 OCOCH<sub>3</sub>), 1.91-1.75 (2H, m, 3-H and 6-H) and 1.36-1.09 (2H, m, 3-H and 6-H); δ<sub>C</sub> (75 MHz, D<sub>2</sub>O) 180.6-180.3-179.8 (C=O), 100.2-98.0 (1'-C and 1''-C), 75.2, 72.7, 72.4, 71.4, 70.9, 50.1, 49.6, 33.7 (3-C and 6-C) and 22.6 (CH<sub>3</sub>); *m/z* (ES) 469 (100%, MH<sup>+</sup>); (Found: MH<sup>+</sup> 469.2503; C<sub>18</sub>H<sub>36</sub>N<sub>4</sub>O<sub>10</sub> requires *MH*, 469.2504).

**(1R,2R,4R,5R)-1-O-(6'-Amino-6'-deoxy-2',3',4'-triol- $\alpha$ -D-glucopyranosyl)-4-O-(6''-Amino-6''-deoxy-2'',3'',4''-triol- $\beta$ -L-glucopyranosyl)-2,5-diamino-cyclohexane-1,4-diol, tetraacetate salt 7AB'**

By methods E and G, **28AB'** (171.0 mg, 0.15 mmol) gave the aminoglycoside **7AB'** (87.8 mg, 83% over two steps) as an orange oil,  $[\alpha]_D +38.4$  (c. 0.97 in H<sub>2</sub>O);  $\delta_H$  (300 MHz, D<sub>2</sub>O) 5.04 (1H, br s, 1'-H), 4.56 (1H, d, *J* 7.7, 1''-H), 4.21-4.08 (1H, m, 1-H or 2-H or 4-H or 5-H), 4.08-3.97 (1H, m, 1-H or 2-H or 4-H or 5-H), 3.89-3.78 (2H, m, 5'-H and 5''-H), 3.71-3.43 (5H, m, 1-H or 2-H or 4-H or 5-H, 2'-H, 3'-H and 3''-H), 3.43-3.19 (5H, m, 2''-H, 4'-H, 4''-H, 6'-H<sub>A</sub> and 6''-H<sub>A</sub>), 3.19-3.00 (2H, m, 6'-H<sub>B</sub> and 6''-H<sub>B</sub>), 2.37-2.07 (4H, m, 3-H and 6-H) and 1.89 (12H, s, 4 OCOCH<sub>3</sub>);  $\delta_C$  (75 MHz, D<sub>2</sub>O) 180.1 (C=O), 102.6, 99.7 (1'-C and 1-C), 75.3, 73.8, 73.0, 72.4, 72.3, 71.3, 69.9, 49.2, 40.6, 29.9 and 22.6 (CH<sub>3</sub>); *m/z* (ES) 469 (100%, MH<sup>+</sup>); (Found: MH<sup>+</sup> 469.2503; C<sub>18</sub>H<sub>36</sub>N<sub>4</sub>O<sub>10</sub> requires *MH*, 469.2504).

**(1S,2S,4S,5S)-1-O-(6'-Amino-6'-deoxy-2',3',4'-triol- $\alpha$ -D-glucopyranosyl)-4-O-(6''-Amino-6''-deoxy-2'',3'',4''-triol- $\beta$ -L-glucopyranosyl)-2,5-diamino-cyclohexane-1,4-diol, tetraacetate salt 7'AB'**

By method E and G, **28'AB'** (12.2 mg, 10.56  $\mu$ mol) was converted into the *acetate salt of aminoglycoside 7'AB'* (7.3 mg, 98%) as a colourless amorphous solid;  $[\alpha]_D^{20} +36.3$  (c 0.39 in H<sub>2</sub>O);  $\delta_H$  (500 MHz; CDCl<sub>3</sub>) 5.18-1.14 (34H, m); *m/z* (ES) 469 (100%, MH<sup>+</sup>); (Found: MH<sup>+</sup> 469.2503; C<sub>18</sub>H<sub>36</sub>N<sub>4</sub>O<sub>10</sub> requires *MH*, 469.2504).

**(1R,2R,4R,5R)-1-O-(6'-Amino-6'-deoxy-2',3',4'-triol- $\alpha$ -D-glucopyranosyl)-4-O-(3''-Amino-3''-deoxy-2'',4'',6''-triol- $\alpha$ -D-glucopyranosyl)-2,5-diamino-cyclohexane-1,4-diol, tetraacetate salt 7AC**

By method G, **28AC** (117.2 mg, 0.11 mmol) gave **7AC** (59.0 mg, 79% over two steps) as an orange oil,  $[\alpha]_D +65.0$  (c. 0.84 in H<sub>2</sub>O);  $\delta_H$  (300 MHz, D<sub>2</sub>O) 5.16-5.00 (2H, m, 1'-H and 1''-H), 4.25-4.00 (2H, m), 3.94-3.44 (8H, m, 2'-H, 3'-H, 4'-H, 5'-H, 2''-H, 3''-H, 4''-H and 5''-H), 3.44-3.00 (4H, m, 6'-H, and 6''-H), 3.00-2.59 (2H, m), 2.41-2.15 (3H, m, 3-H and 6-H), 1.96 (12H, s, 4 OCOCH<sub>3</sub>) and 1.30-1.34 (1H, m, 3-H<sub>B</sub> or 6-H<sub>B</sub>);  $\delta_C$  (75 MHz, D<sub>2</sub>O) 179.4 (C=O),

99.3, 98.8 (1'-C and 1''-C), 74.0, 72.9, 72.4, 71.2, 68.8, 68.1, 66.0, 60.2, 55.2, 49.3, 49.1, 40.6, 30.0, 29.8, 27.2 and 22.4 (CH<sub>3</sub>); *m/z* (ES) 469 (100%, MH<sup>+</sup>); (Found: MH<sup>+</sup>, 469.2499; C<sub>18</sub>H<sub>36</sub>N<sub>4</sub>O<sub>10</sub> requires *MH*, 469.2510).

**(1*S*,2*S*,4*S*,5*S*)-1-*O*-(6'-Amino-6'-deoxy-2',3',4'-triol- $\alpha$ -D-glucopyranosyl)-4-*O*-(3''-Amino-3''-deoxy-2'',4'',6''-triol- $\alpha$ -D-glucopyranosyl)-2,5-diamino-cyclohexane-1,4-diol, tetraacetate salt 7'AC**

By method G, **28'AC** (15.3 mg, 13.75  $\mu$ mol) was converted into the *acetate salt of aminoglycoside 7'AC* (7.1 mg, 73%) as a colourless amorphous solid;  $[\alpha]_D^{20} + 3.4$  (*c* 0.37 in H<sub>2</sub>O);  $\delta_H$  (500 MHz; CDCl<sub>3</sub>) 5.15-1.11 (32H, m); *m/z* (ES) 469 (100%, MH<sup>+</sup>); (Found: MH<sup>+</sup> 469.2505; C<sub>18</sub>H<sub>36</sub>N<sub>4</sub>O<sub>10</sub> requires *MH*, 469.2504).

**(1*S*,3*S*,4*S*,6*S*)-1-*O*-(6'-Amino-6'-deoxy- $\alpha$ -D-glucopyranosyl)-4,6-diamino-cyclohexane-1,3-diol 8A**

By method G, **29A** (124.1 mg, 0.189 mmol) was converted into the *acetate salt of aminoglycoside 8A* (38.2 mg, 42%) as a colourless amorphous solid;  $[\alpha]_D^{20} + 20.0$  (*c* 0.96 in H<sub>2</sub>O);  $\delta_H$  (500 MHz; D<sub>2</sub>O) 5.11 (1H, d, *J* 3.1, 1'-H), 4.12-3.05 (10H, m, 6'-H, 5'-H, 4'-H, 3'-H, 2'-H, 1-H, 3-H, 4-H and 6-H), 2.72-2.67 (1H, m, 5-H or 2-H), 2.22-2.15 (3H, m, 5-H and 2-H) and 1.84 (9H, s, OAc); *m/z* (ES) 307 (100%, MH<sup>+</sup>); (Found: MH<sup>+</sup> 307.1817; C<sub>12</sub>H<sub>26</sub>N<sub>4</sub>O<sub>5</sub> requires *MH*, 307.1981).

**(1*R*,3*R*,4*R*,6*R*)-1-*O*-(6'-Amino-6'-deoxy- $\alpha$ -D-glucopyranosyl)-4,6-diamino-cyclohexane-1,3-diol 8'A**

By method G, **29'A** (22.1 mg, 33.7  $\mu$ mol) was converted into the *acetate salt of aminoglycoside 8'A* (16.8 mg, 100%) as a colourless amorphous solid;  $[\alpha]_D^{20} + 50.5$  (*c* 1.68 in H<sub>2</sub>O);  $\delta_H$  (500 MHz; D<sub>2</sub>O) 5.31 (1H, br s, 1'-H), 4.24 (1H, br s, 3'-H) 4.00-3.96 (1H, m, 5'-H), 3.87-3.80 (3H, m, 3-H, 1-H and 4-H or 6-H), 3.73-3.71 (1H, m, 4-H or 6-H), 3.45-3.32 (3H, m, 6<sub>a</sub>'-H, 4'-H and 2'-H), 3.21 (1H, dd, <sup>2</sup>*J* 13.5 and *J* 6.9, 6<sub>b</sub>'-H), 2.27-2.15 (4H, m, 5-H



and 2-H) and 1.96 (9H, s, OAc);  $m/z$  (ES) 307 (100%,  $MH^+$ ); (Found:  $MH^+$  307.1813;  $C_{12}H_{26}N_4O_5$  requires  $MH$ , 307.1981).

**(1R,3R,4R,6R)-1-O-(2',6'-Amino-2',6'-deoxy- $\alpha$ -D-glucopyranosyl)-4,6-diamino-cyclohexane-1,3-diol 8G**

By method G, **29G** (31.8 mg, 53.84  $\mu$ mol) was converted into the *acetate salt of aminoglycoside 8G* (29 mg, 100%) as a colourless amorphous solid;  $[\alpha]_D^{20} + 10.4$  ( $c$  1.31 in  $H_2O$ );  $\delta_H$  (500 MHz;  $D_2O$ ) 4.70-1.25 (15H, m) and 1.77 (12H, s, OAc);  $m/z$  (ES) 307 (100%,  $MH^+$ ); (Found:  $MH^+$  307.1823;  $C_{12}H_{26}N_4O_5$  requires  $MH$ , 307.1981).

**(1S,3S,4S,6S)-1-O-(2',6'-Amino-2',6'-deoxy- $\alpha$ -D-glucopyranosyl)-4,6-diamino-cyclohexane-1,3-diol 8'G**

By method G, **29'G** (57.8 mg, 97.9  $\mu$ mol) was converted into the *acetate salt of aminoglycoside 8'G* (35.9 mg, 67%) as a colourless amorphous solid;  $[\alpha]_D^{20} + 18.5$  ( $c$  1.64 in  $H_2O$ );  $\delta_H$  (500 MHz;  $D_2O$ ) 5.03 (1H, d,  $J$  3.1, 1'-H), 4.14-4.12 (1H, m, 3'-H), 4.07-4.01 (1H, m, 5'-H), 3.88-3.83 (1H, m, 1-H), 3.69-3.63 (2H, m, 3-H and 4-H or 6-H), 3.56 (1H, dd,  $^2J$  11.1 and  $J$  3.6, 6<sub>a</sub>'-H), 3.42-3.30 (3H, m, 4'H, 2'-H and 4-H or 6-H), 3.15 (1H, dd,  $^2J$  11.1 and  $J$  7.6, 6<sub>b</sub>'-H), 2.26-2.24 (2H, m, 5-H or 2-H), 2.16-2.12 (1H, m, 5-H or 2-H), 2.06-2.03 (1H, m, 5-H or 2-H) and 1.99 (12H, s, OAc);  $\delta_C$  (75 MHz,  $D_2O$ ) 178.0, 95.6, 73.6, 71.0, 69.4, 65.9, 53.6, 50.5, 47.9, 40.3, 33.7, 26.9 and 21.4 (one carbon signal missing or overlapped);  $m/z$  (ES) 307.4 (100%,  $MH^+$ ); (Found:  $MH^+$  307.1969;  $C_{12}H_{26}N_4O_5$  requires  $MH$ , 307.1981).

**(1S,3S,4S,6S)-1-O-(6'-Amino-6'-deoxy- $\alpha$ -D-glucopyranosyl)-3-O-(6''-amino-6''-deoxy- $\alpha$ -D-glucopyranosyl)-4,6-diamino-cyclohexane-1,3-diol 8AA**

By method G, **29AA** (26 mg, 22.5  $\mu$ mol) was converted into the *acetate salt of aminoglycoside 8AA* (15.7 mg, 98%) as a colourless amorphous solid;  $[\alpha]_D^{20} + 2.3$  ( $c$  1.57 in  $H_2O$ );  $\delta_H$  (500 MHz;  $D_2O$ ) 5.09-1.14 (34H, m);  $m/z$  (ES) 469 (100%,  $M^+$ ); (Found:  $MH^+$  469.2512;  $C_{18}H_{36}N_4O_{10}$  requires  $MH$ , 469.2510).

**(1R,3R,4R,6R)-1,3-O-(6'-Amino-6'-deoxy- $\alpha$ -D-glucopyranosyl)-4,6-diamino-cyclohexane-1,3-diol 8'AA**

By method G, **29'AA** (70.8 mg, 63.61  $\mu$ mol) was converted into the *acetate salt of aminoglycoside 8'AA* (26 mg, 58%) as a colourless amorphous solid;  $[\alpha]_D^{20} + 77.5$  (*c* 0.96 in H<sub>2</sub>O);  $\delta_H$  (500 MHz; D<sub>2</sub>O) 5.05 (2H, br s, 1'-H), 4.22-2.23 (20H, m) and 1.87 (12H, s, OAc); *m/z* (ES) 469 (100%, M<sup>+</sup>); (Found: MH<sup>+</sup> 469.2513; C<sub>18</sub>H<sub>36</sub>N<sub>4</sub>O<sub>10</sub> requires *MH*, 469.2510).

**(1R,3R,4R,6R)-1-O-(6'-Amino-6'-deoxy- $\alpha$ -D-glucopyranosyl)-3-O-(6''-amino-6''-deoxy- $\alpha$ -L-glucopyranosyl)-4,6-diamino-cyclohexane-1,3-diol 8'AA'**

By method G, **29'AA'** (45.8 mg, 0.041 mmol) was converted into the *acetate salt of aminoglycoside 8'AA'* (22.4 mg, 77%) as a colourless amorphous solid;  $[\alpha]_D^{20} - 3.8$  (*c* 0.85 in H<sub>2</sub>O);  $\delta_H$  (500 MHz; D<sub>2</sub>O) 5.24 (1H, d, *J* 3.9, 1'-H or 1''-H), 5.16 (1H, *J* d, 3.9, 1'-H or 1''-H), 4.42-1.31 (32H, m, 6''-H, 6'-H, 6-H, 5''-H, 5'-H, 5-H, 4''-H, 4'-H, 4-H, 3''-H, 3'-H, 3-H, 2''-H, 2'-H, 2-H, 1-H and OAc); *m/z* (ES) 469.5 (100%, MH<sup>+</sup>); *m/z* (ES) 469 (100%, M<sup>+</sup>); (Found: MH<sup>+</sup> 469.2513; C<sub>18</sub>H<sub>36</sub>N<sub>4</sub>O<sub>10</sub> requires *MH*, 469.2510).

**(1R,3R,4R,6R)-1-O-(6'-Amino-6'-deoxy- $\alpha$ -D-glucopyranosyl)-3-O-(6''-amino-6''-deoxy- $\beta$ -D-glucopyranosyl)-4,6-diamino-cyclohexane-1,3-diol 8'AB**

By method E and G, **29'AB** (22.9 mg, 19.8  $\mu$ mol) was converted into the *acetate salt of aminoglycoside 8'AB* (8.3 mg, 59%) as a colourless amorphous solid;  $[\alpha]_D^{20} + 10.6$  (*c* 0.83 in H<sub>2</sub>O);  $\delta_H$  (500 MHz; D<sub>2</sub>O) 5.09 (2H, br s, 1'-H and 1''-H), 4.46-2.03 (20H, m) and 1.93 (12H, s, OAc); *m/z* (ES) 469 (100%, M<sup>+</sup>); (Found: MH<sup>+</sup> 469.2513; C<sub>18</sub>H<sub>36</sub>N<sub>4</sub>O<sub>10</sub> requires *MH*, 469.2510).

**(1R,3R,4R,6R)-1-O-(6'-Amino-6'-deoxy- $\alpha$ -D-glucopyranosyl)-3-O-(6''-amino-6''-deoxy- $\beta$ -L-glucopyranosyl)-4,6-diamino-cyclohexane-1,3-diol 8'AB'**

By method E and G, **29'AB'** (67.3 mg, 58.3  $\mu$ mol) was converted into the *acetate salt of aminoglycoside 8'AB'* (40.3 mg, 97%) as a colourless amorphous solid;  $[\alpha]_D^{20} + 8.09$  (*c* 0.89

in H<sub>2</sub>O);  $\delta_{\text{H}}$  (500 MHz; D<sub>2</sub>O) 5.18-1.75 (34H, m);  $m/z$  (ES) 469 (100%, M<sup>+</sup>); (Found: MH<sup>+</sup> 469.2510; C<sub>18</sub>H<sub>36</sub>N<sub>4</sub>O<sub>10</sub> requires MH, 469.2510).

**(1R,3R,4R,6R)-1-O-(6'-Amino-6'-deoxy- $\alpha$ -D-glucopyranosyl)-3-O-(3''-amino-3''-deoxy- $\beta$ -D-glucopyranosyl)-4,6-diamino-cyclohexane-1,3-diol 8'AC**

By method G, **29'AC** (79.9 mg, 0.072 mmol) was converted into the *acetate salt of aminoglycoside 8'AC* (30.3 mg, 59%) as a colourless amorphous solid;  $[\alpha]_{\text{D}}^{20} + 63.9$  (*c* 1.1 in H<sub>2</sub>O);  $\delta_{\text{H}}$  (500 MHz; D<sub>2</sub>O) 5.20-5.11 (2H, m, 1'-H and 1''-H), 4.42-2.79 (14H, m, 6''-H, 6'-H, 6-H, 5''-H, 5'-H, 4''-H, 4'-H, 4-H, 3''-H, 3'-H, 3-H, 2''-H, 2'-H and 1-H), 2.45-2.31 (4H, m, 5-H and 2-H) and 2.01 (12H, s, OAc);  $m/z$  (ES) 469 (100%, M<sup>+</sup>); (Found: MH<sup>+</sup> 469.2515; C<sub>18</sub>H<sub>36</sub>N<sub>4</sub>O<sub>10</sub> requires MH, 469.2510).

**5'-( $\beta$ -D-Glucopyranosyl)-Neamine, tetraacetate salt 9GH**

By Methods E and D, **30GH** (57 mg, 0.056 mmol) gave the aminoglycoside **9GH** (19 mg, 48%) as a yellow-brown oil,  $R_{\text{f}}$  0.05 (2:1 <sup>i</sup>PrOH–NH<sub>4</sub>OH);  $[\alpha]_{\text{D}} + 37.7$  (*c* 0.35, H<sub>2</sub>O);  $\delta_{\text{H}}$  (500 MHz; D<sub>2</sub>O) 5.92 (1H, br s, 1-H), 5.01 (1H, d, *J* 8.9, 1''-H), 4.04 (1H, t, *J* 8.9, 5'-H), 3.94 (1H, t, *J* 8.9, 3-H), 3.92 (1H, t, *J* 8.9, 4'-H), 3.89-3.84 (1H, m, 5-H), 3.83 (1H, br d, *J* 12.3, 6''<sub>B</sub>-H), 3.76 (1H, dd, *J* 9.4 and 8.9, 6'-H), 3.72 (1H, br d, *J* 12.3, 6''<sub>A</sub>-H), 3.46 (1H, br dd, *J* 9.4, 3''-H), 3.43 (1H, m, 3'-H), 3.42-3.40 (4H, m, 4-, 2-, 4''- and 5''-H), 3.39-3.35 (1H, m, 6<sub>B</sub>-H), 3.31 (1H, br dd, *J* 9.4 and 8.9, 2''-H), 3.27-3.24 (1H, m, 1'-H), 3.22 (1H, br dd, *J* 13.7 and 4.7, 6<sub>A</sub>-H), 2.41-2.36 (1H, m, 2''<sub>A</sub>-H), 1.89 (12H, br s, OAc × 4) and 1.77 (1H, app q, *J* 12.4, 2''<sub>B</sub>-H);  $\delta_{\text{C}}$  (75 MHz; D<sub>2</sub>O) 180.7 (C=O), 103.0 (1''-C), 95.8 (1-C), 81.0 (5'-C), 76.7, 75.9, 73.7, 73.4, 70.8, 69.6, 69.4, 68.5, 60.0 (6''-C), 53.7, 49.9, 49.0, 40.3 (6-C), 28.8 (2'-C) and 23.0 (CH<sub>3</sub>);  $m/z$  (ES) 485.2 (100%, MH<sup>+</sup>); Found MH<sup>+</sup> 485.2454; C<sub>18</sub>H<sub>36</sub>N<sub>4</sub>O<sub>11</sub> requires MH<sup>+</sup> 485.2459.

**5'-(2''-amino-2''-deoxy- $\beta$ -D-glucopyranosyl)-Neamine, tetraacetate salt 9GF**

By Method F and D, **30GF** (0.128 g, 0.1 mmol) gave the aminoglycoside **9GF** (42 mg, 42%) as a yellow-brown oil;  $R_{\text{f}}$  0.05 (2 : 1 <sup>i</sup>PrOH–NH<sub>4</sub>OH);  $[\alpha]_{\text{D}} + 20.0$  (*c* 0.46, H<sub>2</sub>O);  $\delta_{\text{H}}$  (500 MHz; D<sub>2</sub>O) 5.84 (1H, d, *J* 3.4, 1-H), 5.16 (1H, d, *J* 8.1, 1''-H), 4.05 (1H, t, *J* 9.1, 5'-H), 3.97

(1H, t,  $J$  9.1, 4'-H), 3.90 (1H, t,  $J$  9.1, 3-H), 3.79-3.68 (4H, m, 5-, 6'-, 6''<sub>A</sub>- and 6''<sub>B</sub>-H), 3.60 (1H, t,  $J$  8.7, 3''-H), 3.46-3.41 (2H, m, 4''- and 3'-H), 3.40-3.34 (3H, m, 2-, 4- and 5''-H), 3.31 (1H, dd,  $J$  13.6 and 3.1, 6<sub>A</sub>-H), 3.24 (1H, m, 1'-H), 3.19 (1H, dd,  $J$  13.6 and 5.8, 6<sub>B</sub>-H), 3.11 (1H, dd,  $J$  8.7 and 8.1, 2''-H), 2.36-2.33 (1H, m, 2'<sub>A</sub>-H), 1.92 (15H, s, AcO × 5) and 1.76 (1H, app q,  $J$  12.2, 2'<sub>B</sub>-H);  $\delta_C$  (125 MHz; D<sub>2</sub>O) 179.7 (CH<sub>3</sub>CO), 102.3 (1''-C), 97.8 (1-C), 82.9 (5'-C), 79.2 (5''-C), 77.1 (4'-C), 75.3 (6'-C), 74.4 (3''-C), 72.0 (5-C), 71.7 (4''-C), 70.6 (3-C), 61.8 (6''-C), 58.3 (2''-C), 55.8 (2-C), 52.5 (1'-C), 51.2 (3'-C), 42.5 (6-C), 30.7 (2'-C) and 23.2 (CH<sub>3</sub>CO);  $m/z$  (ES) 485.2 (100%, MH<sup>+</sup>); Found MH<sup>+</sup> 485.2474; C<sub>18</sub>H<sub>36</sub>N<sub>4</sub>O<sub>11</sub> requires MH<sup>+</sup> 485.2459.

### 5'-( $\beta$ -L-glucopyranosyl)-Neamine, tetraacetate salt **9GH'**

By Methods E and D, **30GH'** (129 mg, 0.13 mmol) gave the aminoglycoside **9GH'** (44 mg, 61%) as a yellow-brown oil,  $R_f$  0.05 (2:1 *i*PrOH–NH<sub>4</sub>OH);  $[\alpha]_D +45.0$  ( $c$  0.4 in H<sub>2</sub>O);  $\delta_H$  (500 MHz; D<sub>2</sub>O) 5.92 (1H, d,  $J$  3.6, 1-H), 4.71 (1H, d,  $J$  7.9, 1''-H), 3.98 (1H, t,  $J$  9.5, 4'-H), 3.94-3.91 (1H, m, 5-H), 3.92-3.89 (1H, m 5'-H), 3.89-3.86 (1H, m, 6''<sub>A</sub>-H), 3.71 (1H, t,  $J$  9.7, 6'-H), 3.58 (1H, dd,  $J$  8.4 and 4.9, 6''<sub>B</sub>-H), 3.47 (1H, t,  $J$  9.2, 3''-H), 3.48-3.45 (1H, m, 5''-H), 3.42 (1H, t,  $J$  9.1, 4-H), 3.39-3.34 (5H, m, 2-, 2''-, 3'-, 6<sub>A</sub>- and 3-H), 3.31 (1H, t,  $J$  9.2, 4''-H), 3.29-3.26 (1H, m, 1'-H), 3.22 (1H, dd,  $J$  13.7 and 6.8, 6<sub>B</sub>-H), 2.35-2.32 (1H, m, 2'<sub>A</sub>-H), 1.89 (12H, s, AcO × 4) and 1.77 (1H, app q,  $J$  12.5, 2'<sub>B</sub>-H);  $\delta_C$  (125 MHz; D<sub>2</sub>O) 181.2 (CH<sub>3</sub>CO), 102.3 (1''-C), 95.7 (1-C), 86.2 (5'-C), 77.4 (4'-C), 76.7 (5''-C), 76.2 (3''-C), 73.8 (2''-C), 72.0 (6'-C), 70.7 (4-C), 69.9 (2-C), 69.8 (4''-C), 68.6 (5-C), 61.0 (6''-C), 53.6 (3-C), 50.1 (1'-C), 48.9 (3'-C), 40.3 (6-C), 29.1 (2'-C) and 23.9 (CH<sub>3</sub>CO);  $m/z$  (ES) 484.2 (100%, MH<sup>+</sup>); Found MH<sup>+</sup> 484.2639; C<sub>18</sub>H<sub>37</sub>N<sub>5</sub>O<sub>10</sub> requires MH<sup>+</sup> 484.2619.

1. R. Hodgson, T. Majid and A. Nelson, *J. Chem. Soc., Perkin Trans. 1* 2002, 1444.
2. (a) G. Kavadias, B. Belleau, U.S. patent 1977, 4003922; (b) J. Rudolph, K. L. Reddy, J. P. Chaing and K. B. Sharpless, *J. Am. Chem. Soc.* 1997, **119**, 6189.
3. H. C. Kolb, M. G. Finn, and K. B. Sharpless, *Angew. Chem., Int. Ed. Engl.* 2001, **40**, 2004.

4. P. Konradsson, P. J. Garegg, J.-L. Maloisel, and T. Buskas, *Tetrahedron: Asymmetry* 1994, **5**, 2187.
5. D. Vourloumis, G. C. Winters, M. Takahashi, K. B. Simonsen, B. K. Ayida, S. Shandrick, Q. Zhao, and T. Hermann, *ChemBioChem* 2003, **4**, 879.
6. T. W. Craig, G. R. Harvey, G. A. Berchtold, *J. Org. Chem.*, **1967**, 32, 3745.
